# Supplementary material for: A comprehensive AI‐driven analysis of large‐scale omic datasets reveals novel dual‐purpose targets for the treatment of cancer and aging
Source: PubMed Central journal article supplement (PMC10726874; doi:10.1111/acel.14017), 2023-10-27
Supplement: ACEL-22-e14017-s002.pdf [file ACEL-22-e14017-s002.pdf]

**Table S1. Disease and dataset selection**

| <b>Solid cancers (n = 11)</b> | <b>Number of dataset comparison:</b> | <b>Number of cases</b> | <b>Number of controls</b> | <b>Dataset identifiers</b>                                                                                                                                                                                            |
|-------------------------------|--------------------------------------|------------------------|---------------------------|-----------------------------------------------------------------------------------------------------------------------------------------------------------------------------------------------------------------------|
| Adrenal cortex carcinoma      | 6                                    | 198                    | 42                        | GSE10927, GSE12368, GSE19750, GSE33371, GSE75415, GSE90713<br>GSE10780, GSE115144, GSE120129, GSE17907, GSE31448, GSE36295                                                                                            |
| Breast carcinoma              | 19                                   | 2,424                  | 739                       | GSE38959, GSE57297, GSE5764, GSE58135, GSE59246, GSE61304,<br>GSE61723, GSE65212, GSE70905, GSE70947, GSE71651, GSE83591,<br>TCGA-BRCA<br>E-MTAB-57, GSE123390, GSE18105, GSE20842, GSE21510, GSE22598                |
| Colorectal carcinoma          | 19                                   | 1,211                  | 523                       | GSE28866, GSE32323, GSE41657, GSE4183, GSE44076, GSE62932<br>GSE68468, GSE75548, GSE76855, GSE77199, GSE89076, PDC000116<br>TCGA-COADREAD                                                                             |
| Endometrial cancer            | 7                                    | 786                    | 102                       | GSE115810, GSE17025, GSE36389, GSE56087, GSE63678, PDC000125<br>TCGA-UCEC                                                                                                                                             |
| Esophageal carcinoma          | 8                                    | 473                    | 188                       | GSE1420, GSE161533, GSE20347, GSE23400, GSE70409, GSE74553<br>GSE75241, TCGA-ESCA<br>E-MTAB-1440, GSE103236, GSE118897, GSE122401, GSE13195,<br>GSE13911                                                              |
| Gastric carcinoma             | 20                                   | 1,111                  | 698                       | GSE19826, GSE27342, GSE29272, GSE29998, GSE30727, GSE33335<br>GSE37023, GSE37023, GSE51575, GSE56807, GSE63089, GSE79973<br>GSE85465, TCGA-STAD<br>E-MTAB-5905, GSE102079, GSE107170, GSE19665, GSE36376,<br>GSE45267 |
| Hepatocellular carcinoma      | 13                                   | 1,118                  | 651                       | GSE59259, GSE60502, GSE6764, GSE67764, GSE82177, PDC000198<br>TCGA-LIHC<br>E-MEXP-231, E-MTAB-1690, E-MTAB-3950, E-MTAB-5231, GSE104854                                                                               |
| Lung cancer                   | 23                                   | 2,457                  | 1,012                     | GSE18842, GSE19188, GSE19804, GSE28866, GSE30219, GSE40791<br>GSE43458, GSE44077, GSE63459, GSE74706, GSE75324, GSE83227<br>GSE84776, PDC000153, PDC000219, PDC000234, TCGA-LUAD, TCGA-<br>LUSC                       |
| Ovarian carcinoma             | 5                                    | 112                    | 28                        | GSE10971, GSE124766, GSE146553, GSE27651, GSE36668                                                                                                                                                                    |
| Pancreatic carcinoma          | 15                                   | 595                    | 301                       | GSE136569, GSE141873, GSE143754, GSE15471, GSE16515, GSE18670<br>GSE22780, GSE28735, GSE55643, GSE56560, GSE60646, GSE62165<br>GSE62452, GSE63111, PDC000270                                                          |
| Prostate adenocarcinoma       | 6                                    | 818                    | 147                       | E-MTAB-6128, GSE111320, GSE68555, GSE6956, PXD010744, TCGA-<br>PRAD                                                                                                                                                   |

| TOTAL                                | 141                          | 11,303                    | 4,431                                   |
|--------------------------------------|------------------------------|---------------------------|-----------------------------------------|
| <b>GTEEx healthy tissue (n = 47)</b> | <b>Number of all samples</b> | <b>Number of young gr</b> | <b>Number of old group (aged 60-79)</b> |
| Adipose subcutaneous                 | 663                          | 213                       | 237                                     |
| Adipose visceral omentum             | 541                          | 175                       | 182                                     |
| Adrenal gland*                       | 258                          | 88                        | 81                                      |
| Artery aorta                         | 432                          | 143                       | 140                                     |
| Artery coronary                      | 240                          | 63                        | 82                                      |
| Artery tibial                        | 663                          | 232                       | 215                                     |
| Brain amygdala                       | 152                          | 22                        | 85                                      |
| Brain anterior cingulate corte       | 176                          | 32                        | 103                                     |
| Brain caudate basal ganglia          | 246                          | 38                        | 135                                     |
| Brain cerebellar hemisphere          | 215                          | 31                        | 119                                     |
| Brain cerebellum                     | 241                          | 39                        | 127                                     |
| Brain cortex                         | 255                          | 42                        | 136                                     |
| Brain frontal cortex ba9             | 209                          | 26                        | 120                                     |
| Brain hippocampus                    | 197                          | 31                        | 114                                     |
| Brain hypothalamus                   | 202                          | 25                        | 117                                     |
| Brain nucleus accumbens bas          | 246                          | 36                        | 135                                     |
| Brain putamen basal ganglia          | 205                          | 29                        | 109                                     |
| Brain spinal cord cervical c-1       | 159                          | 22                        | 90                                      |
| Brain substantia nigra               | 139                          | 23                        | 81                                      |
| Breast mammary tissue*               | 459                          | 165                       | 155                                     |
| Cells ebv-Transformed lymph          | 174                          | 70                        | 50                                      |
| Colon sigmoid*^                      | 373                          | 129                       | 135                                     |
| Colon transverse                     | 406                          | 165                       | 105                                     |
| Esophagus gastroesophageal           | 375                          | 135                       | 103                                     |
| Esophagus mucosa*^                   | 555                          | 208                       | 166                                     |
| Esophagus muscularis                 | 515                          | 206                       | 143                                     |
| Heart atrial appendage               | 429                          | 95                        | 180                                     |
| Heart left ventricle                 | 432                          | 114                       | 164                                     |
| Liver*                               | 226                          | 59                        | 84                                      |
| Lung*                                | 578                          | 166                       | 212                                     |
| Minor salivary gland                 | 162                          | 60                        | 52                                      |
| Muscle skeletal                      | 803                          | 256                       | 292                                     |
| Nerve tibial                         | 619                          | 200                       | 229                                     |
| Ovary*                               | 180                          | 73                        | 46                                      |
| Pancreas*                            | 328                          | 126                       | 84                                      |

|                                |               |              |              |
|--------------------------------|---------------|--------------|--------------|
| Pituitary                      | 283           | 41           | 155          |
| Prostate*                      | 245           | 93           | 80           |
| Skin not sun exposed suprapu   | 604           | 188          | 226          |
| Skin sun exposed lower leg     | 701           | 223          | 260          |
| Small intestine terminal ileun | 187           | 85           | 46           |
| Spleen                         | 241           | 101          | 54           |
| Stomach*                       | 359           | 147          | 84           |
| Testis                         | 361           | 119          | 125          |
| Thyroid                        | 653           | 208          | 234          |
| Uterus*                        | 142           | 69           | 28           |
| Vagina                         | 156           | 64           | 42           |
| Whole blood                    | 755           | 249          | 272          |
| <b>TOTAL</b>                   | <b>16,740</b> | <b>5,124</b> | <b>6,214</b> |

\* Tissues corresponding to the 11 studied cancers

^ Colon sigmoid and esophagus mucosa were selected as they are the prevalent primary sites for the corresponding cancers

**Table S2. Age-associated expression changes in protein-coding genes and cancer-related genes in 47 GTEx tissues**

| GTEx healthy tissues[1]               | Protein-coding genes[2]   |                         |                        |                          | Tumor suppressor genes[3] |                         |                        |                          |
|---------------------------------------|---------------------------|-------------------------|------------------------|--------------------------|---------------------------|-------------------------|------------------------|--------------------------|
|                                       | Number of genes sequenced | Number of dysregulation | Number of upregulation | Number of downregulation | Number of genes sequenced | Number of dysregulation | Number of upregulation | Number of downregulation |
| Adrenal gland*                        | 15,690                    | 4,406 (28.08%)          | 948                    | 3,458                    | 247                       | 85 (34.41%)             | 17                     | 68                       |
| Breast mammary tissue*                | 15,939                    | 4,321 (27.11%)          | 1,525                  | 2,796                    | 245                       | 65 (26.53%)             | 34                     | 31                       |
| Colon sigmoid*^                       | 15,865                    | 6,185 (38.99%)          | 2,453                  | 3,732                    | 250                       | 112 (44.8%)             | 24                     | 88                       |
| Esophagus mucosa*^                    | 15,796                    | 9,436 (59.74%)          | 2,500                  | 6,936                    | 246                       | 168 (68.29%)            | 24                     | 144                      |
| Liver*                                | 15,483                    | 1,482 (9.57%)           | 503                    | 979                      | 247                       | 12 (4.86%)              | 3                      | 9                        |
| Lung*                                 | 16,104                    | 8,495 (52.75%)          | 4,009                  | 4,486                    | 250                       | 143 (57.2%)             | 82                     | 61                       |
| Ovary*                                | 15,757                    | 4,519 (28.68%)          | 2,163                  | 2,356                    | 246                       | 82 (33.33%)             | 25                     | 57                       |
| Pancreas*                             | 15,702                    | 1,770 (11.27%)          | 339                    | 1,431                    | 248                       | 34 (13.71%)             | 5                      | 29                       |
| Prostate*                             | 16,203                    | 5,048 (31.15%)          | 2,713                  | 2,335                    | 251                       | 74 (29.48%)             | 48                     | 26                       |
| Stomach*                              | 15,860                    | 2,393 (15.09%)          | 376                    | 2,017                    | 250                       | 45 (18%)                | 6                      | 39                       |
| Uterus*                               | 15,766                    | 6,944 (44.04%)          | 1,777                  | 5,167                    | 244                       | 116 (47.54%)            | 26                     | 90                       |
| Adipose subcutaneous                  | 15,697                    | 8,598 (54.77%)          | 1,952                  | 6,646                    | 245                       | 145 (59.18%)            | 29                     | 116                      |
| Adipose visceral omentum              | 15,786                    | 8,470 (53.66%)          | 3,227                  | 5,243                    | 245                       | 141 (57.55%)            | 45                     | 96                       |
| Artery aorta                          | 15,547                    | 8,177 (52.6%)           | 1,875                  | 6,302                    | 246                       | 152 (61.79%)            | 27                     | 125                      |
| Artery coronary                       | 15,703                    | 2,309 (14.7%)           | 391                    | 1,918                    | 247                       | 41 (16.6%)              | 7                      | 34                       |
| Artery tibial                         | 15,345                    | 11,245 (73.28%)         | 1,662                  | 9,583                    | 245                       | 202 (82.45%)            | 25                     | 177                      |
| Brain amygdala                        | 15,953                    | 5,489 (34.41%)          | 1,368                  | 4,121                    | 248                       | 88 (35.48%)             | 35                     | 53                       |
| Brain anterior cingulate cortex ba24  | 16,068                    | 3,598 (22.39%)          | 682                    | 2,916                    | 248                       | 58 (23.39%)             | 15                     | 43                       |
| Brain caudate basal ganglia           | 16,068                    | 3,093 (19.25%)          | 697                    | 2,396                    | 249                       | 42 (16.87%)             | 7                      | 35                       |
| Brain cerebellar hemisphere           | 15,896                    | 2,652 (16.68%)          | 746                    | 1,906                    | 249                       | 42 (16.87%)             | 12                     | 30                       |
| Brain cerebellum                      | 16,008                    | 3,240 (20.24%)          | 1,026                  | 2,214                    | 251                       | 51 (20.32%)             | 16                     | 35                       |
| Brain cortex                          | 16,150                    | 4,672 (28.93%)          | 1,501                  | 3,171                    | 249                       | 68 (27.31%)             | 21                     | 47                       |
| Brain frontal cortex ba9              | 16,070                    | 5,742 (35.73%)          | 1,941                  | 3,801                    | 249                       | 93 (37.35%)             | 33                     | 60                       |
| Brain hippocampus                     | 15,996                    | 4,841 (30.26%)          | 1,082                  | 3,759                    | 248                       | 71 (28.63%)             | 23                     | 48                       |
| Brain hypothalamus                    | 16,194                    | 4,356 (26.9%)           | 822                    | 3,534                    | 249                       | 76 (30.52%)             | 15                     | 61                       |
| Brain nucleus accumbens basal ganglia | 16,071                    | 2,234 (13.9%)           | 838                    | 1,396                    | 249                       | 37 (14.86%)             | 7                      | 30                       |
| Brain putamen basal ganglia           | 15,930                    | 1,371 (8.61%)           | 396                    | 975                      | 248                       | 12 (4.84%)              | 2                      | 10                       |
| Brain spinal cord cervical c-1        | 15,924                    | 416 (2.61%)             | 278                    | 138                      | 248                       | 9 (3.63%)               | 7                      | 2                        |
| Brain substantia nigra                | 15,905                    | 1040 (6.54%)            | 288                    | 752                      | 248                       | 16 (6.45%)              | 4                      | 12                       |
| Cells ebv-Transformed lymphocytes     | 15,037                    | 1092 (7.26%)            | 967                    | 125                      | 244                       | 13 (5.33%)              | 13                     | 0                        |
| Colon transverse                      | 16,099                    | 10,040 (62.36%)         | 6,254                  | 3,786                    | 251                       | 141 (56.18%)            | 77                     | 64                       |
| Esophagus gastroesophageal junction   | 15,695                    | 6,817 (43.43%)          | 1,377                  | 5,440                    | 249                       | 127 (51%)               | 19                     | 108                      |
| Esophagus muscularis                  | 15,686                    | 8,008 (51.05%)          | 1,539                  | 6,469                    | 249                       | 143 (57.43%)            | 18                     | 125                      |
| Heart atrial appendage                | 15,576                    | 4,561 (29.28%)          | 1,257                  | 3,304                    | 247                       | 76 (30.77%)             | 22                     | 54                       |
| Heart left ventricle                  | 15,194                    | 6,920 (45.54%)          | 1,811                  | 5,109                    | 244                       | 113 (46.31%)            | 25                     | 88                       |
| Minor salivary gland                  | 16,094                    | 4,925 (30.6%)           | 1,198                  | 3,727                    | 247                       | 77 (31.17%)             | 8                      | 69                       |
| Muscle skeletal                       | 15,090                    | 9,728 (64.47%)          | 1,923                  | 7,805                    | 241                       | 169 (70.12%)            | 31                     | 138                      |
| Nerve tibial                          | 15,917                    | 8,537 (53.63%)          | 2,253                  | 6,284                    | 246                       | 129 (52.44%)            | 42                     | 87                       |
| Pituitary                             | 16,376                    | 1,408 (8.6%)            | 827                    | 581                      | 248                       | 18 (7.26%)              | 15                     | 3                        |
| Skin not sun exposed suprapubic       | 16,067                    | 6,100 (37.97%)          | 3,235                  | 2,865                    | 247                       | 102 (41.3%)             | 71                     | 31                       |
| Skin sun exposed lower leg            | 16,085                    | 6,269 (38.97%)          | 1,706                  | 4,563                    | 248                       | 111 (44.76%)            | 34                     | 77                       |

|                                |        |                |       |       |     |              |    |     |
|--------------------------------|--------|----------------|-------|-------|-----|--------------|----|-----|
| Small intestine terminal ileum | 16,179 | 1,852 (11.45%) | 1,226 | 626   | 250 | 35 (14%)     | 15 | 20  |
| Spleen                         | 15,873 | 2,514 (15.84%) | 1,226 | 1,288 | 245 | 40 (16.33%)  | 18 | 22  |
| Testis                         | 17,631 | 3,075 (17.44%) | 995   | 2,080 | 252 | 54 (21.43%)  | 9  | 45  |
| Thyroid                        | 15,955 | 6,759 (42.36%) | 1,689 | 5,070 | 245 | 127 (51.84%) | 22 | 105 |
| Vagina                         | 15,955 | 5,724 (35.88%) | 1,400 | 4,324 | 249 | 98 (39.36%)  | 9  | 89  |
| Whole blood                    | 14,375 | 9,464 (65.84%) | 3,955 | 5,509 | 239 | 161 (67.36%) | 82 | 79  |

[1] Tissues corresponding to the 11 studied cancers were marked with an asterisk. ^ Colon sigmoid and esophagus mucosa were selected as they are the prevalent primary sites for the corresponding cancers

[2] A total of 19,334 protein coding genes

[3] A total of 252 tumor suppressor genes

**Table S3. The list of tumor suppressor genes analyzed**

ABI1  
ACVR1B  
ACVR2A  
AMER1  
APC  
ARHGAP26  
ARHGEF10  
ARHGEF10L  
ARHGEF12  
ARID1A  
ARID1B  
ARID2  
ASXL1  
ASXL2  
ATM  
ATP2B3  
ATR  
ATRX  
AXIN1  
AXIN2  
B2M  
BAP1  
BARD1  
BAX  
BAZ1A  
BCL10  
BCOR  
BLM  
BRCA1  
BRCA2

BRIP1  
BTG1  
BUB1B  
CAMTA1  
CASP3  
CASP8  
CASP9  
CBFA2T3  
CBFB  
CBLB  
CCDC6  
CCNB1IP1  
CCNC  
CD274  
CDC73  
CDH1  
CDH10  
CDH11  
CDK12  
CDKN1B  
CDKN2A  
CDKN2C  
CDX2  
CEBPA  
CHD2  
CHEK2  
CIC  
CIITA  
CLTC  
CLTCL1  
CNBP

CNOT3  
CPEB3  
CREB3L1  
CREBBP  
CTCF  
CUL3  
CYLD  
DAXX  
DDX10  
DDX3X  
DICER1  
DNM2  
DROSHA  
EBF1  
EED  
EIF3E  
ELF3  
ELL  
EP300  
EPS15  
ERCC2  
ERCC3  
ERCC4  
ERCC5  
ETNK1  
ETV6  
EXT1  
EXT2  
FANCA  
FANCC  
FANCD2



FANCE  
FANCF  
FANCG  
FAS  
FAT1  
FAT4  
FBLN2  
FBXO11  
FBXW7  
FEN1  
FH  
FHIT  
FLCN  
FUBP1  
FUS  
GATA1  
GATA3  
GPC5  
GRIN2A  
HNF1A  
ID3  
IGF2BP2  
IKZF1  
KAT6B  
KDM5C  
KDM6A  
KEAP1  
KLF6  
KMT2C  
KMT2D  
KNL1

LARP4B  
LATS1  
LATS2  
LEPROTL1  
LRIG3  
LRP1B  
LZTR1  
MAP3K1  
MAX  
MEN1  
MGMT  
MLF1  
MLH1  
MSH2  
MSH6  
MUTYH  
MYH9  
N4BP2  
NAB2  
NBN  
NCOA4  
NCOR1  
NCOR2  
NDRG1  
NF1  
NF2  
NFKBIE  
NOTCH1  
NOTCH2  
NRG1  
NTHL1

PALB2  
PATZ1  
PAX5  
PBRM1  
PER1  
PHF6  
PHOX2B  
PIK3R1  
PML  
PMS2  
POLD1  
POLE  
POLG  
POT1  
PPARG  
PPP6C  
PRDM1  
PRDM2  
PRF1  
PTCH1  
PTEN  
PTPN13  
PTPN6  
PTPRB  
PTPRC  
PTPRD  
PTPRK  
PTPRT  
RAD17  
RAD51B  
RANBP2

RB1  
RBM10  
RFWD3  
RHOH  
RMI2  
RNF43  
ROBO2  
RPL10  
RPL22  
RPL5  
RSPO2  
RUNX1  
SBDS  
SDHA  
SDHAF2  
SDHB  
SDHC  
SDHD  
SETD1B  
SETD2  
SFPQ  
SFRP4  
SH2B3  
SIRPA  
SLC34A2  
SMAD2  
SMAD3  
SMAD4  
SMARCA4  
SMARCB1  
SMARCD1

SMARCE1  
SMC1A  
SOCS1  
SOX21  
SOX9  
SPEN  
STAG1  
STAG2  
STK11  
SUFU  
TET2  
TGFB2  
TMEM127  
TNFAIP3  
TNFRSF14  
TP53  
TPM3  
TRAF7  
TRIM33  
TSC1  
TSC2  
USP44  
VHL  
WIF1  
WNK2  
WRN  
WT1  
XPA  
XPC  
YWHAE  
ZBTB16

ZFHX3  
ZMYM3  
ZNF331  
ZNRF3  
ZRSR2

**Table S4. Overlapped pathways dysregulation in aging and cancer**

| Cellular processes                               | The percentage of dysregulated cellular processes[1] |        |               |        |           |         |       |      |       |          |          |         |
|--------------------------------------------------|------------------------------------------------------|--------|---------------|--------|-----------|---------|-------|------|-------|----------|----------|---------|
|                                                  | Adrenal gland                                        | Breast | Colon sigmoid | Uterus | Esophagus | Stomach | Liver | Lung | Ovary | Pancreas | Prostate | Average |
| Upregulation in aging & cancer                   | 2.5                                                  | 11.5   | 5.1           | 1.7    | 6.6       | 4.1     | 0.4   | 11.3 | 3.3   | 0.9      | 5.4      | 4.8     |
| Downregulation in aging & cancer                 | 12.6                                                 | 10.9   | 21.6          | 17.3   | 26.2      | 0.5     | 9.6   | 9.9  | 12    | 0.9      | 10.3     | 12      |
| Upregulation in cancer & downregulation in aging | 9.2                                                  | 8.1    | 21.7          | 16.7   | 41.3      | 23.6    | 6.2   | 24.1 | 41.6  | 4.5      | 7        | 18.5    |
| Dowregulation in cancer & upregulation in aging  | 3.3                                                  | 13.7   | 11.9          | 1      | 6.5       | 0.7     | 1.7   | 30.8 | 4.1   | 0.2      | 21.7     | 8.7     |
| TOTAL                                            | 27.6                                                 | 44.2   | 60.3          | 36.7   | 80.6      | 28.9    | 17.9  | 76.1 | 61    | 6.5      | 44.4     | 44      |

[1] The percentage of dysregulated pathways in all cellular process overlapped in aging and cancer in corresponding tissues.

**Table S5. Overlapped unidirectionally dysregulated pathways in aging and cancer**

| Pathways[1]                          | Upstream signaling pathways | Main cellular processes               | Unidirectional dysregulation in aging and cancer | GTEX tissues  | iPANDA score (aging) | Cancer types             | iPANDA score (cancer) |
|--------------------------------------|-----------------------------|---------------------------------------|--------------------------------------------------|---------------|----------------------|--------------------------|-----------------------|
| Cellular Senescence                  | Cellular Senescence         | Cellular response to external stimuli | Upregulation                                     | Adrenal gland | 0.0102               | Adrenocortical carcinoma | 0.042                 |
| Cellular Senescence                  | Cellular Senescence         | Cellular response to external stimuli | Upregulation                                     | Breast        | 0.0527               | Breast carcinoma         | 0.1831                |
| Cellular Senescence                  | Cellular Senescence         | Cellular response to external stimuli | Upregulation                                     | Lung          | 0.0313               | Lung cancer              | 0.139                 |
| Cellular Senescence                  | Cellular Senescence         | Cellular response to external stimuli | Upregulation                                     | Pancreas      | 0.0174               | Pancreatic carcinoma     | 0.1421                |
| Cellular Senescence                  | Cellular Senescence         | Cellular response to external stimuli | Upregulation                                     | Prostate      | 0.0347               | Prostate adenocarcinoma  | 0.077                 |
| Cellular Senescence                  | Cellular Senescence         | Cellular response to external stimuli | Upregulation                                     | Stomach       | 0.0191               | Gastric carcinoma        | 0.1638                |
| Cellular Senescence                  | Cellular Senescence         | Cellular response to external stimuli | Upregulation                                     | Colon sigmoid | 0.0112               | Colorectal carcinoma     | 0.0715                |
| Oncogene Induced Senescence          | Cellular Senescence         | Cellular response to external stimuli | Upregulation                                     | Stomach       | 0.0506               | Gastric carcinoma        | 0.1495                |
| Oncogene Induced Senescence          | Cellular Senescence         | Cellular response to external stimuli | Upregulation                                     | Lung          | 0.0767               | Lung cancer              | 0.0629                |
| Oncogene Induced Senescence          | Cellular Senescence         | Cellular response to external stimuli | Upregulation                                     | Pancreas      | 0.051                | Pancreatic carcinoma     | 0.1884                |
| Oncogene Induced Senescence          | Cellular Senescence         | Cellular response to external stimuli | Upregulation                                     | Prostate      | 0.0617               | Prostate adenocarcinoma  | 0.0374                |
| Oncogene Induced Senescence          | Cellular Senescence         | Cellular response to external stimuli | Upregulation                                     | Breast        | 0.0761               | Breast carcinoma         | 0.1067                |
| Oncogene Induced Senescence          | Cellular Senescence         | Cellular response to external stimuli | Upregulation                                     | Colon sigmoid | 0.0587               | Colorectal carcinoma     | 0.083                 |
| Oxidative Stress Induced Senescence  | Cellular Senescence         | Cellular response to external stimuli | Upregulation                                     | Breast        | 0.0446               | Breast carcinoma         | 0.2781                |
| Oxidative Stress Induced Senescence  | Cellular Senescence         | Cellular response to external stimuli | Upregulation                                     | Colon sigmoid | 0.0272               | Colorectal carcinoma     | 0.0526                |
| Oxidative Stress Induced Senescence  | Cellular Senescence         | Cellular response to external stimuli | Upregulation                                     | Lung          | 0.051                | Lung cancer              | 0.1834                |
| Oxidative Stress Induced Senescence  | Cellular Senescence         | Cellular response to external stimuli | Upregulation                                     | Pancreas      | 0.0277               | Pancreatic carcinoma     | 0.1415                |
| Oxidative Stress Induced Senescence  | Cellular Senescence         | Cellular response to external stimuli | Upregulation                                     | Prostate      | 0.0419               | Prostate adenocarcinoma  | 0.0938                |
| Oxidative Stress Induced Senescence  | Cellular Senescence         | Cellular response to external stimuli | Upregulation                                     | Stomach       | 0.0343               | Gastric carcinoma        | 0.1726                |
| Adenylate cyclase inhibitory pathway | GPCR downstream signalling  | Signal transduction                   | Downregulation                                   | Adrenal gland | -0.0358              | Adrenocortical carcinoma | -0.0311               |
| Adenylate cyclase inhibitory pathway | GPCR downstream signalling  | Signal transduction                   | Downregulation                                   | Breast        | -0.0313              | Breast carcinoma         | -0.2577               |
| Adenylate cyclase inhibitory pathway | GPCR downstream signalling  | Signal transduction                   | Downregulation                                   | Colon sigmoid | -0.0108              | Colorectal carcinoma     | -0.1508               |
| Adenylate cyclase inhibitory pathway | GPCR downstream signalling  | Signal transduction                   | Downregulation                                   | Esophagus     | -0.0785              | Esophageal carcinoma     | -0.0703               |
| Adenylate cyclase inhibitory pathway | GPCR downstream signalling  | Signal transduction                   | Downregulation                                   | Liver         | -0.0209              | Hepatocellular carcinoma | -0.0156               |
| Adenylate cyclase inhibitory pathway | GPCR downstream signalling  | Signal transduction                   | Downregulation                                   | Ovary         | -0.1015              | Ovarian carcinoma        | -0.0557               |
| Adenylate cyclase inhibitory pathway | GPCR downstream signalling  | Signal transduction                   | Downregulation                                   | Uterus        | -0.1387              | Endometrial cancer       | -0.3542               |
| G-protein mediated events            | GPCR downstream signalling  | Signal transduction                   | Downregulation                                   | Adrenal gland | -0.0259              | Adrenocortical carcinoma | -0.0384               |
| G-protein mediated events            | GPCR downstream signalling  | Signal transduction                   | Downregulation                                   | Breast        | -0.0225              | Breast carcinoma         | -0.1996               |
| G-protein mediated events            | GPCR downstream signalling  | Signal transduction                   | Downregulation                                   | Colon sigmoid | -0.0125              | Colorectal carcinoma     | -0.1505               |
| G-protein mediated events            | GPCR downstream signalling  | Signal transduction                   | Downregulation                                   | Esophagus     | -0.0907              | Esophageal carcinoma     | -0.0604               |
| G-protein mediated events            | GPCR downstream signalling  | Signal transduction                   | Downregulation                                   | Liver         | -0.0145              | Hepatocellular carcinoma | -0.0472               |
| G-protein mediated events            | GPCR downstream signalling  | Signal transduction                   | Downregulation                                   | Ovary         | -0.087               | Ovarian carcinoma        | -0.056                |
| GAB1 signalosome                     | Signaling by EGFR           | Signal transduction                   | Downregulation                                   | Colon sigmoid | -0.0399              | Colorectal carcinoma     | -0.0389               |
| GAB1 signalosome                     | Signaling by EGFR           | Signal transduction                   | Downregulation                                   | Esophagus     | -0.2263              | Esophageal carcinoma     | -0.2972               |
| GAB1 signalosome                     | Signaling by EGFR           | Signal transduction                   | Downregulation                                   | Lung          | -0.0635              | Lung cancer              | -0.1342               |
| GAB1 signalosome                     | Signaling by EGFR           | Signal transduction                   | Downregulation                                   | Ovary         | -0.06                | Ovarian carcinoma        | -0.0135               |
| GAB1 signalosome                     | Signaling by EGFR           | Signal transduction                   | Downregulation                                   | Prostate      | -0.0481              | Prostate adenocarcinoma  | -0.1793               |
| GAB1 signalosome                     | Signaling by EGFR           | Signal transduction                   | Downregulation                                   | Uterus        | -0.2109              | Endometrial cancer       | -0.0737               |
| MAP2K and MAPK activation            | MAPK1/MAPK3 signaling       | Signal transduction                   | Downregulation                                   | Breast        | -0.0132              | Breast carcinoma         | -0.0102               |
| MAP2K and MAPK activation            | MAPK1/MAPK3 signaling       | Signal transduction                   | Downregulation                                   | Colon sigmoid | -0.0405              | Colorectal carcinoma     | -0.0972               |
| MAP2K and MAPK activation            | MAPK1/MAPK3 signalling      | Signal transduction                   | Downregulation                                   | Esophagus     | -0.09                | Esophageal carcinoma     | -0.0466               |
| MAP2K and MAPK activation            | MAPK1/MAPK3 signaling       | Signal transduction                   | Downregulation                                   | Liver         | -0.0105              | Hepatocellular carcinoma | -0.0521               |
| MAP2K and MAPK activation            | MAPK1/MAPK3 signalling      | Signal transduction                   | Downregulation                                   | Lung          | -0.0386              | Lung cancer              | -0.1614               |
| MAP2K and MAPK activation            | MAPK1/MAPK3 signalling      | Signal transduction                   | Downregulation                                   | Prostate      | -0.057               | Prostate adenocarcinoma  | -0.0723               |

[1] Reactome pathways that are dysregulated in a unidirectional manner in more than 5 types of cancer (i.e., 50%) and their corresponding healthy GTEX tissues



Table S6. Top 100 AI-derived common high confidence and novel cancer targets

| Targets | Protein family      | Clinical trial status | Novelty[1] | Ranking         |                                       |              | Aging                        |                                                                                                                                                                                                                                                                                                            |                         | Cancer                 |                          |                               | Therapeutic approach for cancer treatment[6] | Reported in database: Results | Observed effects on longevity[5] | Therapeutic approach for anti-aging | Involved in target wheel[7]     | Aging-association                                                                                                                                                                                                                                                                                                                                            |                        |                          | Remarks | References             |                                                                                                                                                                                                                                                                                                                                                                                                                                                                                      |                                                                                                                                                                                                                             |
|---------|---------------------|-----------------------|------------|-----------------|---------------------------------------|--------------|------------------------------|------------------------------------------------------------------------------------------------------------------------------------------------------------------------------------------------------------------------------------------------------------------------------------------------------------|-------------------------|------------------------|--------------------------|-------------------------------|----------------------------------------------|-------------------------------|----------------------------------|-------------------------------------|---------------------------------|--------------------------------------------------------------------------------------------------------------------------------------------------------------------------------------------------------------------------------------------------------------------------------------------------------------------------------------------------------------|------------------------|--------------------------|---------|------------------------|--------------------------------------------------------------------------------------------------------------------------------------------------------------------------------------------------------------------------------------------------------------------------------------------------------------------------------------------------------------------------------------------------------------------------------------------------------------------------------------|-----------------------------------------------------------------------------------------------------------------------------------------------------------------------------------------------------------------------------|
|         |                     |                       |            | Overall rank[2] | Number of cancers (ranked as top 100) | Average rank | Number of aging hallmarks[3] | Hallmarks of aging                                                                                                                                                                                                                                                                                         | Number of dysregulation | Number of upregulation | Number of downregulation | Number of cancer hallmarks[4] |                                              |                               |                                  |                                     |                                 | Number of dysregulation                                                                                                                                                                                                                                                                                                                                      | Number of upregulation | Number of downregulation |         |                        | Group 1: Evidence in extending lifespan, dual-purpose (same direction of therapeutic inhibition or activation)                                                                                                                                                                                                                                                                                                                                                                       | Group 2: Evidence in extending lifespan, not dual-purpose (opposite direction of therapeutic inhibition or activation)                                                                                                      |
| AKT1    | AGC kinase          | Yes                   | HC         | 1               | 11                                    | 11.5         | 12                           | Atheros intercellular communications, Cellular senescence, Deregulated nutrient signaling, Epigenetic shift, Extracellular matrix stiffness, Genomic instability, Impaired proteostasis, Inflammation, Mitochondrial dysfunction, Retrotranspositions, Stem cell exhaustion                                | 11                      | 1                      | 10                       | 10                            | 8                                            | 5                             | 3                                | Antagonism                          | Reported: Lifespan extension    | Anti-Longevity: Deletion mutation (akt-1 mg306) increased lifespan in <i>C. elegans</i> .<br>Deletion mutation (akt-1 ok525) increased lifespan in <i>C. elegans</i> .<br>Deletion mutation (akt-2 ok393) increased lifespan in <i>C. elegans</i> .<br>Heterogeneous knockout mutants (akt1) increased lifespan in mice.                                     | Antagonism             | Yes                      | Group 1 | SynergyAge/GenAge      | AKT1 as a therapeutic target (antagonist) for cancer.                                                                                                                                                                                                                                                                                                                                                                                                                                | PMID: 2303948, PMID: 3088672, PMID: 19240135, PMID: 16241854, PMID: 23784884, PMID: 16839187, PMID: 25412228, PMID: 20629993, PMID: 21802287, PMID: 15068796, PMID: 21802287, PMID: 21802287, PMID: 25412228, PMID: 2393948 |
| ESR1    | Nuclear receptor    | Yes                   | HC         | 2               | 11                                    | 22.4         | 5                            | Epigenetic shift, Extracellular matrix stiffness, Genomic instability, Inflammation, Stem cell exhaustion                                                                                                                                                                                                  | 18                      | 12                     | 6                        | 5                             | 10                                           | 1                             | 9                                | Antagonism*                         | Reported: Lifespan extension    | Pro-Longevity: 17 $\alpha$ -estradiol (ESR1 agonist) extended lifespan in mice <i>in</i> preferentially in males.<br>Beta-Estradiol (ESR1 agonist) induced the ESR1 translocation to the cell membrane, and was shown to increase lifespan in <i>C. elegans</i> .<br>Estradiol (ESR1 agonist) extended lifespan significantly in <i>C. elegans</i> and mice. | Agonism                | Yes                      | Group 2 | rugAge, GeroProtectors | Antagonist or agonist for cancer. Fulvestrant and anastrozole are used for breast cancer treatment. For instance, fulvestrant, ESR1 inhibitor, used to treat HR+ breast cancer that may also be HR2+, while anastrozole is both an antagonist and an agonist of the estrogen receptor.                                                                                                                                                                                               | PMID: 2424566, PMID: 19262626, PMID: 9465319, PMID: 2413640, PMID: 2173233, PMID: 3372245, PMID: 3378871                                                                                                                    |
| PLK1    | Protein kinase      | Yes                   | HC         | 3               | 11                                    | 29.5         | 4                            | Cellular senescence, Genomic instability, Impaired proteostasis, Inflammation                                                                                                                                                                                                                              | 13                      | 4                      | 9                        | 2                             | 11                                           | 11                            | 0                                | Antagonism                          | Not reported                    | No evidence                                                                                                                                                                                                                                                                                                                                                  | NA                     | Yes                      | Group 4 | -                      | Antagonist for cancer. PLK1 is involved in cell cycle regulation and DNA checkpoint during healthy aging. PLK1 promotes aneuploidy pole loss-of-function increased lifespan of Alzheimer-like <i>Drosophila</i> .<br>Antagonist for cancer. DNMT1 maintains genomic methylation stability and insufficient DNA methylation affects healthy aging and promotes age-related health problems. No difference in longevity was observed between Dnmt1-deficient mice and normal controls. | PMID: 28102733, PMID: 2659721                                                                                                                                                                                               |
| DNMT1   | Methyltransferase   | Yes                   | HC         | 4               | 11                                    | 30.4         | 2                            | Epigenetic shift, Genomic instability                                                                                                                                                                                                                                                                      | 15                      | 1                      | 14                       | 1                             | 10                                           | 10                            | 0                                | Antagonism                          | Not reported                    | No evidence                                                                                                                                                                                                                                                                                                                                                  | NA                     | Yes                      | Group 4 | -                      | Antagonist for cancer. DNMT1 maintains genomic methylation stability and insufficient DNA methylation affects healthy aging and promotes age-related health problems. No difference in longevity was observed between Dnmt1-deficient mice and normal controls.                                                                                                                                                                                                                      | PMID: 22704347, PMID: 1610855                                                                                                                                                                                               |
| CDK1    | CMGC kinase         | Yes                   | HC         | 5               | 11                                    | 31.2         | 6                            | Cellular senescence, Extracellular matrix stiffness, Genomic instability, Impaired proteostasis, Mitochondrial dysfunction, Stem cell exhaustion                                                                                                                                                           | 13                      | 4                      | 9                        | 3                             | 11                                           | 11                            | 0                                | Antagonism                          | Reported: Lifespan extension    | Anti-Longevity: cdk-1 RNAi increased lifespan by 43% in <i>C. elegans</i> .                                                                                                                                                                                                                                                                                  | Antagonism             | Yes                      | Group 1 | -                      | Antagonist for cancer. CDK1 is involved in cell cycle regulation during healthy aging                                                                                                                                                                                                                                                                                                                                                                                                | PMID: 2766845                                                                                                                                                                                                               |
| CHEK1   | Protein kinase      | Yes                   | HC         | 6               | 11                                    | 31.6         | 3                            | Cellular senescence, Epigenetic shift, Genomic instability, Atheros intercellular communications, Cellular senescence, Deregulated nutrient signaling, Epigenetic shift, Extracellular matrix stiffness, Genomic instability, Impaired proteostasis, Inflammation, Stem cell exhaustion, Telomere          | 18                      | 6                      | 12                       | 2                             | 10                                           | 10                            | 0                                | Antagonism                          | Reported: Lifespan extension    | Anti-Longevity: chk-1 (RNAi) increased lifespan by 15% to 25% in <i>C. elegans</i> .                                                                                                                                                                                                                                                                         | Agonism                | Yes                      | Group 2 | GenAge                 | Antagonist for cancer. CHEK1 is involved in DNA damage response and cell cycle checkpoint response during healthy aging                                                                                                                                                                                                                                                                                                                                                              | PMID: 1674121                                                                                                                                                                                                               |
| EGFR    | Receptor kinase     | Yes                   | HC         | 7               | 11                                    | 35.6         | 10                           | Atheros intercellular communications, Cellular senescence, Epigenetic shift, Extracellular matrix stiffness, Genomic instability, Impaired proteostasis, Inflammation, Stem cell exhaustion, Telomere                                                                                                      | 17                      | 0                      | 17                       | 7                             | 8                                            | 2                             | 6                                | Antagonism                          | Reported: Lifespan extension    | Pro-Longevity: let-23 (gain-of-function) mutants lifespan increased by 29%, while let-23 (loss-of-function) mutants lifespan decreased by 19% in <i>C. elegans</i> .                                                                                                                                                                                         | Agonism                | Yes                      | Group 2 | GenAge                 | Antagonist for some cancers but EGFR inhibition results in skin aging and age-related decline. EGFR inhibition was shown to molecular alterations in keratinocytes, likely contributing to the observed skin aging. EGFR activation promoting extended healthspan, while EGFR inactivation associated with age-related decline.                                                                                                                                                      | PMID: 2716055, PMID: 2049712                                                                                                                                                                                                |
| BRCA1   | Acytransferase      | No                    | HC         | 8               | 11                                    | 36.4         | 6                            | Cellular senescence, Epigenetic shift, Genomic instability, Impaired proteostasis, Stem cell exhaustion                                                                                                                                                                                                    | 19                      | 3                      | 16                       | 7                             | 10                                           | 10                            | 0                                | Antagonism                          | Reported: Reduced lifespan only | Pro-Longevity: Heterogeneous BRCA1 mutant lifespan was decreased in mice.                                                                                                                                                                                                                                                                                    | NA                     | Yes                      | Group 3 | GenAge                 | Tumor suppressor gene                                                                                                                                                                                                                                                                                                                                                                                                                                                                | PMID: 13420720                                                                                                                                                                                                              |
| CHEK2   | Protein kinase      | Yes                   | HC         | 9               | 11                                    | 37.9         | 3                            | Cellular senescence, Genomic instability, Impaired proteostasis, Deregulated nutrient signaling, Extracellular matrix stiffness, Genomic instability, Impaired proteostasis, Inflammation, Stem cell exhaustion, Telomere                                                                                  | 15                      | 14                     | 1                        | 2                             | 9                                            | 9                             | 0                                | Antagonism                          | Reported: Lifespan extension    | Anti-Longevity: Lifespan of <i>Brevitarsus</i> (111)Chk2 <sup>-/-</sup> mice longer than <i>Brevitarsus</i> (111)Chk2 <sup>+/+</sup> mice.                                                                                                                                                                                                                   | Antagonism             | Yes                      | Group 1 | GenAge                 | Tumor suppressor gene. CHEK2 inhibitors were investigated in multiple cancers (max p2 completed, NCT0314847)                                                                                                                                                                                                                                                                                                                                                                         | PMID: 1667955                                                                                                                                                                                                               |
| KDR     | Receptor kinase     | Yes                   | HC         | 10              | 11                                    | 42.7         | 8                            | Cellular senescence, Genomic instability, Impaired proteostasis, Mitochondrial dysfunction, Stem cell exhaustion, Telomere, extracellular matrix stiffness, Genomic instability, Impaired proteostasis, Inflammation, Mitochondrial dysfunction                                                            | 12                      | 3                      | 9                        | 7                             | 9                                            | 2                             | 7                                | Antagonism*                         | Not reported                    | No evidence                                                                                                                                                                                                                                                                                                                                                  | NA                     | Yes                      | Group 4 | -                      | KDR antagonists such as Ramucicamab, Cabozantinib approved for cancer treatment but our data showed KDR downregulation in cancers. KDR may be needed for normal angiogenesis, to ensure developing or healing tissues receive an adequate supply of nutrients.                                                                                                                                                                                                                       | PMID: 26619626                                                                                                                                                                                                              |
| MMP2    | Peptidase           | Yes                   | HC         | 11              | 11                                    | 44.5         | 6                            | Atheros intercellular communications, Cellular senescence, Epigenetic shift, Genomic instability, Stem cell exhaustion                                                                                                                                                                                     | 13                      | 11                     | 2                        | 5                             | 9                                            | 4                             | 5                                | Antagonism                          | Not reported                    | No evidence                                                                                                                                                                                                                                                                                                                                                  | NA                     | Yes                      | Group 4 | -                      | Matrix metalloproteinases are involved in cancer invasion and metastasis - advanced stage of cancer. Aging is associated with increased matrix metalloproteinase-2 activity in the human aorta. MMP2 was considered as classical senescence-associated secretory phenotype (SASP).                                                                                                                                                                                                   | PMID: 15831360                                                                                                                                                                                                              |
| SMARCA4 | Hydrolase           | No                    | HC         | 12              | 11                                    | 49.7         | 5                            | Atheros intercellular communications, Cellular senescence, Epigenetic shift, Genomic instability, Stem cell exhaustion                                                                                                                                                                                     | 27                      | 2                      | 25                       | 0                             | 11                                           | 10                            | 1                                | Antagonism                          | Not reported                    | No evidence                                                                                                                                                                                                                                                                                                                                                  | NA                     | Yes                      | Group 4 | -                      | Tumor suppressor gene                                                                                                                                                                                                                                                                                                                                                                                                                                                                |                                                                                                                                                                                                                             |
| CDK4    | CMGC kinase         | Yes                   | HC         | 13              | 10                                    | 16.5         | 4                            | Deregulated nutrient signaling, Epigenetic shift, Extracellular matrix stiffness                                                                                                                                                                                                                           | 17                      | 2                      | 15                       | 6                             | 10                                           | 10                            | 0                                | Antagonism                          | Reported: Lifespan extension    | Pro-Longevity: Overexpression of CyclD/CD4 in <i>Drosophila</i> increased lifespan.                                                                                                                                                                                                                                                                          | Agonism                | Yes                      | Group 2 | -                      | Antagonist for cancer. CDK4 is involved in cell cycle regulation during healthy aging                                                                                                                                                                                                                                                                                                                                                                                                | PMID: 26219626                                                                                                                                                                                                              |
| CDK2    | CMGC kinase         | Yes                   | HC         | 14              | 10                                    | 22.9         | 2                            | Cellular senescence, Genomic instability, Atheros intercellular communications, Cellular senescence, Deregulated nutrient signaling, Epigenetic shift, Extracellular matrix stiffness, Genomic instability, Impaired proteostasis, Inflammation, Mitochondrial dysfunction, Stem cell exhaustion, Telomere | 7                       | 4                      | 3                        | 4                             | 10                                           | 10                            | 0                                | Antagonism                          | Reported: Lifespan extension    | Anti-Longevity: cdk-2 RNAi increased lifespan by 28% in <i>C. elegans</i> .                                                                                                                                                                                                                                                                                  | Antagonism             | Yes                      | Group 1 | -                      | Tumor suppressor gene. CDK2 inhibitors were investigated in multiple cancers (max p2 completed, NCT0314847)                                                                                                                                                                                                                                                                                                                                                                          | PMID: 2766845                                                                                                                                                                                                               |
| PARP1   | Glycosyltransferase | Yes                   | HC         | 15              | 10                                    | 24.6         | 10                           | Cellular senescence, Epigenetic shift, Extracellular matrix stiffness, Genomic instability, Inflammation, Mitochondrial dysfunction, Stem cell exhaustion, Telomere                                                                                                                                        | 32                      | 1                      | 31                       | 3                             | 11                                           | 10                            | 1                                | Antagonism                          | Reported: Lifespan extension    | Anti-Longevity: Overexpression hPARP1 (double knock-in) significantly decreased lifespan in mice. Mutation, RNAi and PARP inhibitors (AZD2281 (ABI-888) extended lifespan by 29%, 20%, 15-22% in <i>C. elegans</i> , respectively. pome-1 mutant increased lifespan in <i>C. elegans</i> . Muscle PARP1 inhibition extends lifespan in <i>Drosophila</i> .   | Antagonism             | Yes                      | Group 1 | GenAge                 | Antagonist for cancer. PARP1 is involved in base excision repair during healthy aging.                                                                                                                                                                                                                                                                                                                                                                                               | PMID: 20641897, PMID: 2387310, PMID: 31878234, PMID: 36947517                                                                                                                                                               |
| AURKA   | Protein kinase      | Yes                   | HC         | 16              | 10                                    | 27.0         | 6                            | Cellular senescence, Genomic instability, Impaired proteostasis, Inflammation, Mitochondrial dysfunction, Stem cell exhaustion                                                                                                                                                                             | 18                      | 2                      | 16                       | 0                             | 11                                           | 11                            | 0                                | Antagonism                          | Not reported                    | No evidence                                                                                                                                                                                                                                                                                                                                                  | NA                     | Yes                      | Group 4 | -                      | Antagonist for cancer. AURKA is involved in cell cycle regulation during healthy aging                                                                                                                                                                                                                                                                                                                                                                                               |                                                                                                                                                                                                                             |

|        |                    |     |    |    |    |      |    |  |  |    |   |    |   |    |    |   |               |                              |                                                                                                                                                                                                                                                                                                                                                                                                                                                                                                                                                                                                                                                                   |               |     |         |                       |                                                                                                                                                                                                                                                                                                                                                                                                                                                                                                                                                                                                                                                                                                                                                                                                                                                                                                                                                                                                                    |                                                                                                                                                                     |
|--------|--------------------|-----|----|----|----|------|----|--|--|----|---|----|---|----|----|---|---------------|------------------------------|-------------------------------------------------------------------------------------------------------------------------------------------------------------------------------------------------------------------------------------------------------------------------------------------------------------------------------------------------------------------------------------------------------------------------------------------------------------------------------------------------------------------------------------------------------------------------------------------------------------------------------------------------------------------|---------------|-----|---------|-----------------------|--------------------------------------------------------------------------------------------------------------------------------------------------------------------------------------------------------------------------------------------------------------------------------------------------------------------------------------------------------------------------------------------------------------------------------------------------------------------------------------------------------------------------------------------------------------------------------------------------------------------------------------------------------------------------------------------------------------------------------------------------------------------------------------------------------------------------------------------------------------------------------------------------------------------------------------------------------------------------------------------------------------------|---------------------------------------------------------------------------------------------------------------------------------------------------------------------|
| VEGFA  | Growth factor      | Yes | HC | 17 | 10 | 29.3 | 8  |  |  | 13 | 9 | 4  | 5 | 11 | 10 | 1 | Antagonism    | Not reported                 | No evidence                                                                                                                                                                                                                                                                                                                                                                                                                                                                                                                                                                                                                                                       | NA            | Yes | Group 4 | -                     | Antagonist for cancer. Counteracting age-related VEGF signaling insufficiency promotes healthy aging and extends lifespan.                                                                                                                                                                                                                                                                                                                                                                                                                                                                                                                                                                                                                                                                                                                                                                                                                                                                                         | PMID:34226210                                                                                                                                                       |
| PPARG  | Nuclear receptor   | Yes | HC | 18 | 10 | 30.1 | 9  |  |  | 13 | 1 | 12 | 3 | 8  | 2  | 6 | Agonism       | Reported: Lifespan extension | Pro-Longevity: Ala/Ala Knock-in lifespan increased by 13%, and hypomorphic mutants decrease lifespan by 11% in mice.<br>Deaflike agonism PPARG extended lifespan significantly in <i>C. elegans</i> .<br>Hypomorphic Pparg12 knockout decreased lifespan in mice.                                                                                                                                                                                                                                                                                                                                                                                                 | Agonism       | Yes | Group 1 | ge.GenAge/Geroprotect | Tumor suppressor gene; Agonist for cancer                                                                                                                                                                                                                                                                                                                                                                                                                                                                                                                                                                                                                                                                                                                                                                                                                                                                                                                                                                          | PMID:19117549<br>PMID:23603800<br>PMID:19997528                                                                                                                     |
| GSK3B  | CMGC kinase        | Yes | HC | 19 | 10 | 30.9 | 9  |  |  | 33 | 0 | 33 | 7 | 9  | 9  | 0 | Antagonism    | Reported: Lifespan extension | Anti-Longevity: agg (GSK3B) RNAi increased the lifespan in <i>Drosophila</i> .<br>Lithium chloride antagonising GSK3B extended lifespan significantly in <i>C. elegans</i> and <i>Drosophila</i> . Worthy note that complete absence of GSK3B in <i>C. elegans</i> , <i>Drosophila</i> , and mice shortened lifespan or prevents development.                                                                                                                                                                                                                                                                                                                     | Antagonism    | Yes | Group 1 | IngAge/Geroprotect    | Adult overexpression of USK-49 in the brain of mice rescues in neurodegeneration.<br>Key mediators of senescence signaling such as p16 and p53 physically interact with GSK3 $\beta$ , and act as its putative substrates.<br>Low dose lithium uptake promoted longevity in human and <i>C. elegans</i> .<br>Lithium chloride antagonising GSK3B extended lifespan significantly in <i>C. elegans</i> and <i>Drosophila</i> .<br>Therapeutic targeting of GSK3 $\beta$ by microdose lithium later in life decreased senescence signaling and delayed kidney aging in mice.<br>Lithium extended lifespan in female and male in <i>Drosophila</i> , when administered throughout adulthood or only later in life.<br>Importantly, although lithium chloride extended lifespan in <i>C. elegans</i> , it could not extend lifespan in male gsk-3 (n2047) mutant (reduction in lifespan instead) compared to wild type <i>C. elegans</i> . The <i>C. elegans</i> mutation has been identified as <i>gsk-3(n2047)</i> . | PMID:27068460<br>PMID:17959600<br>PMID:23301855<br>PMID:24398558<br>PMID:11221512<br>PMID:35162324                                                                  |
| MTOR   | Protein kinase     | Yes | HC | 20 | 10 | 33.4 | 12 |  |  | 32 | 0 | 32 | 6 | 8  | 6  | 2 | Antagonism    | Reported: Lifespan extension | Anti-Longevity: In roundworms, TOR deficiency more than doubled the lifespan.<br>TOR disruption in <i>Drosophila</i> also extended lifespan.<br>Hypomorphic mutation increase lifespan by 20% in mice.<br>Knockdown of TOR increased the longevity of $\delta$ -2 mutants in <i>C. elegans</i> .<br>MTOR inhibitor, rapamycin extends lifespan and delays cancer in mice.<br>Rapamycin inhibiting MTOR extended longevity in <i>Drosophila</i> and mice.                                                                                                                                                                                                          | Antagonism    | Yes | Group 1 | Genoprotect, Synerg   | MTOR inhibitor, everolimus (gastrointestinal or lung origin with unresectable, locally advanced or metastatic disease), temsirolimus (Renal cell carcinoma) were approved drug for cancer treatment.                                                                                                                                                                                                                                                                                                                                                                                                                                                                                                                                                                                                                                                                                                                                                                                                               | PMID:17277769<br>PMID:14668950<br>PMID:15186745<br>PMID:24550224<br>PMID:23994476<br>PMID:23017609<br>PMID:24341993<br>PMID:19587080<br>PMID:24409289               |
| PIK3CA | Non-protein kinase | Yes | HC | 21 | 10 | 33.6 | 9  |  |  | 19 | 3 | 16 | 9 | 6  | 3  | 3 | Antagonism    | Reported: Lifespan extension | Anti-Longevity: ago-1 mutants lifespan increased by 65% in <i>C. elegans</i> .<br>ago-1 (hs546) mutants lifespan increased by 40-100% in <i>C. elegans</i> .<br>ago-1(RNAi) increased lifespan by 170% in <i>C. elegans</i> .<br>ago-1(mg44) mutants lifespan increased by 1000% in <i>C. elegans</i> .<br>ago-1(hs546) mutant <i>C. elegans</i> were long-lived by almost two-fold.<br>ago-1(mg44) mutant <i>C. elegans</i> extended lifespan compared to wild-type.<br>Pictilisib inhibiting PIK3CA extended lifespan significantly in <i>C. elegans</i> .                                                                                                      | Antagonism    | Yes | Group 1 | ge.GenAge, Synergy?   | Suppressing the activity of the p115alpha isoform of PIK3CA preserved cardiac function and prevented cardiac aging in mice.<br>MTOR is a downstream effector of PI3K.<br>Selective anti-cancer agent vorinostat, PIK inhibitor, increased lifespan in <i>Drosophila</i> .<br>PI3-kinase p110-alpha subunit inhibitor was investigated drugs in various clinical trials for cancer treatment.                                                                                                                                                                                                                                                                                                                                                                                                                                                                                                                                                                                                                       | PMID:23543623<br>PMID:2392681<br>PMID:7789761<br>PMID:3608934<br>PMID:19998808<br>PMID:17996009<br>PMID:19822807<br>PMID:24096697<br>PMID:14668486<br>PMID:18282672 |
| ERBB2  | Receptor kinase    | Yes | HC | 22 | 10 | 35.5 | 3  |  |  | 17 | 6 | 11 | 6 | 10 | 6  | 4 | Antagonism    | Reported: Lifespan extension | Pro-Longevity: Let-23 mutants (reduction-of-function) survive less robustly in middle adulthood than matched wild type controls (19% decrease of median lifespan, 8% decrease of maximum lifespan) in <i>C. elegans</i> .<br>Let-23 mutants (gain-of-function) survive more robustly in middle adulthood (29% increase of median lifespan, 9% increase of maximum lifespan) in <i>C. elegans</i> .                                                                                                                                                                                                                                                                | Antagonism    | Yes | Group 2 | GenAge                | Antagonist for cancer but ERBB2 signaling is important for health.<br>ERBB2 signaling in the heart is essential for the prevention of dilated cardiomyopathy,<br>and ERBB2 is necessary for oligodendrocytes, specialized glial cells, myelinate CNS axons.<br>ERBB2 is healthy driver.                                                                                                                                                                                                                                                                                                                                                                                                                                                                                                                                                                                                                                                                                                                            | PMID:35370556<br>PMID:14749424<br>PMID:3706808<br><a href="https://doi.org/10.1016/j.ccr.2016.06.016">https://doi.org/10.1016/j.ccr.2016.06.016</a>                 |
| MET    | Receptor kinase    | Yes | HC | 23 | 10 | 39.3 | 3  |  |  | 19 | 3 | 16 | 8 | 10 | 8  | 2 | Antagonism    | Not reported                 | No evidence                                                                                                                                                                                                                                                                                                                                                                                                                                                                                                                                                                                                                                                       | NA            | Yes | Group 4 | -                     | Antagonist for cancer.<br>MET is a target of multiple approved drugs such as cabozantinib, crizotinib and brigatinib for cancer.                                                                                                                                                                                                                                                                                                                                                                                                                                                                                                                                                                                                                                                                                                                                                                                                                                                                                   | PMID:28672324                                                                                                                                                       |
| MMP9   | Peptidase          | Yes | HC | 24 | 10 | 39.9 | 6  |  |  | 3  | 1 | 2  | 7 | 9  | 9  | 0 | Antagonism    | Not reported                 | No evidence                                                                                                                                                                                                                                                                                                                                                                                                                                                                                                                                                                                                                                                       | NA            | No  | -       | -                     | <7 tissues (out of 47) dysregulated during aging.<br>Antagonist for cancer.<br>MMP-9 short interfering RNA induced senescence and MMP9 is one of CclAge Database of Cell Senescence Genes                                                                                                                                                                                                                                                                                                                                                                                                                                                                                                                                                                                                                                                                                                                                                                                                                          | PMID:15710426<br><a href="https://genomica.senescence.info/">https://genomica.senescence.info/</a>                                                                  |
| IL6    | Interleukin        | Yes | HC | 25 | 10 | 53.0 | 7  |  |  | 3  | 2 | 1  | 6 | 6  | 2  | 4 | Antagonism    | Not reported                 | No evidence                                                                                                                                                                                                                                                                                                                                                                                                                                                                                                                                                                                                                                                       | NA            | No  | -       | -                     | <7 tissues (out of 47) dysregulated during aging.<br>IL6 antagonists such as Siltuximab approved for immune system disease and investigated for cancer but our data showed IL6 downregulation in cancers.<br>Pro-inflammatory cytokine IL-6 is commonly present in the senescence-associated secretory phenotype (SASP).<br>Interleukin-6 knockout inhibits senescence of bone mesenchymal stem cells in high-fat diet-induced bone loss                                                                                                                                                                                                                                                                                                                                                                                                                                                                                                                                                                           | PMID:33679606                                                                                                                                                       |
| CDK6   | CMGC kinase        | Yes | HC | 26 | 9  | 27.6 | 4  |  |  | 15 | 3 | 12 | 4 | 7  | 5  | 2 | Antagonism    | Not reported                 | No evidence                                                                                                                                                                                                                                                                                                                                                                                                                                                                                                                                                                                                                                                       | NA            | Yes | Group 4 | -                     | Antagonist for cancer.<br>CDK6 is involved in cell cycle regulation during healthy aging                                                                                                                                                                                                                                                                                                                                                                                                                                                                                                                                                                                                                                                                                                                                                                                                                                                                                                                           |                                                                                                                                                                     |
| AR     | Nuclear receptor   | Yes | HC | 27 | 9  | 31.9 | 6  |  |  | 23 | 6 | 17 | 2 | 8  | 1  | 7 | nim / Antagon | Reported: Lifespan extension | Pro-Longevity: Danazol agonistic AR & TOR extended lifespan in <i>C. elegans</i> .                                                                                                                                                                                                                                                                                                                                                                                                                                                                                                                                                                                | Agonism       | Yes | Group 2 | IngAge/Geroprotect    | Progressive reduced insulin sensitivity and impaired glucose tolerance were seen in AR-knockout mice with advancing age.<br>Aging AR-knockout mice displayed accelerated weight gain, hyperinsulinemia, and hyperglycemia, and loss of AR contributes to increased triglyceride content in skeletal muscle and liver.<br>Dietary calorie restriction, which retards age-related disease and extends lifespan, reverses loss of AR expression and restores androgen sensitivity of the aging liver.<br>AR antagonist was approved for the treatment of prostate cancer, while AR agonist was approved for the treatment of breast cancer. Our data showed AR downregulation in 6 cancers.                                                                                                                                                                                                                                                                                                                           | PMID:15919793<br>PMID:1886227<br>PMID:3706808<br>PMID:24136430                                                                                                      |
| IGF1   | Growth factor      | Yes | HC | 28 | 9  | 32.0 | 12 |  |  | 15 | 6 | 9  | 8 | 8  | 1  | 7 | Antagonism*   | Reported: Lifespan extension | Anti-Longevity: Congenital liver IGF-1-deficient mice were increased with lifespan.<br>Hypomorphic mutation increased maximum lifespan by 12% in mice.<br><i>C. elegans</i> lifespan extension can be achieved by reduced Daf-2/insulin/Igf-like signaling.<br>Pro-longevity: IGF-1 cardiac-specific overexpression increased lifespan in mice.<br>Overexpression of dilp2,3,5 decreased lifespan in <i>Drosophila</i> .<br>Knockdown of dilp2,3,5 decreased lifespan by 10.5% in male, 18.5% in virgin females and 33.5% in mated females ( <i>Drosophila</i> ).<br>No effects: dilp2 RNAi only was not sufficient to change the lifespan in <i>Drosophila</i> . | nim / Antagon | Yes | Group 2 | GenAge                | IGF1 inhibitors such as sarmaximab, degarelixmab were investigated for cancer treatment in clinical trials.<br>Insulin resistance is increased with aging. Mice lacking IGF1 in the liver have shown to display enhanced insulin sensitivity and glucose homeostasis. Female liver-specific IGF-1 inactivation mice showed a 16% increase in lifespan. However, IGF-1 cardiac-specific overexpression increased lifespan in mice. The effects of IGF-1 on longevity may be tissue-specific.                                                                                                                                                                                                                                                                                                                                                                                                                                                                                                                        | PMID:21799224<br>PMID:24341939<br>PMID:23873963<br>PMID:17973971<br>PMID:15709881<br>PMID:22935001<br>PMID:10005564<br>PMID:20195504                                |

|        |                     |     |    |    |   |      |   |    |    |    |   |    |    |   |             |                                                                                                                   |                                                                                                                                                                                                                                                                                                                                                                                                                                                                                                                                         |            |     |         |                   |                                                                                                                                                                                                                                                                                                                                                                                                                                                                                                                                                                                                                                                                                                                                                                                                                                                                                                                                                                                                              |                                                                                                             |
|--------|---------------------|-----|----|----|---|------|---|----|----|----|---|----|----|---|-------------|-------------------------------------------------------------------------------------------------------------------|-----------------------------------------------------------------------------------------------------------------------------------------------------------------------------------------------------------------------------------------------------------------------------------------------------------------------------------------------------------------------------------------------------------------------------------------------------------------------------------------------------------------------------------------|------------|-----|---------|-------------------|--------------------------------------------------------------------------------------------------------------------------------------------------------------------------------------------------------------------------------------------------------------------------------------------------------------------------------------------------------------------------------------------------------------------------------------------------------------------------------------------------------------------------------------------------------------------------------------------------------------------------------------------------------------------------------------------------------------------------------------------------------------------------------------------------------------------------------------------------------------------------------------------------------------------------------------------------------------------------------------------------------------|-------------------------------------------------------------------------------------------------------------|
| NRX1   | Nuclear receptor    | Yes | HC | 29 | 9 | 34.8 | 4 | 14 | 4  | 10 | 0 | 10 | 2  | 8 | Agonism     | Not reported                                                                                                      | No evidence                                                                                                                                                                                                                                                                                                                                                                                                                                                                                                                             | NA         | Yes | Group 4 | -                 | NRX1 agonist was investigated for cancer treatment in clinical trials. Mice with impaired NRX1 function showed behavioral deficits indicative of cognitive impairment. Cyposterone acetate inhibiting AR, PGR & NRX1 (approved for human use) extended lifespan in <i>C. elegans</i> .<br>Desamethazine, NRX1 agonist, has been used for cancer treatment. MAPK3 (ERK1) antagonists such as silvestrins and tomotinols were investigated for cancer treatment.<br>Age-associated selective impairment in the MAPK signaling pathways in the aged brain.<br>Lifelong caloric restriction completely prevented the age-related decrease in brain ERK activity and diminished the age-related reduction of p38 MAPK activity.                                                                                                                                                                                                                                                                                   | PMID: 33684964<br>PMID: 24134630                                                                            |
| MAPK3  | CMGC kinase         | Yes | HC | 30 | 9 | 35.4 | 7 | 19 | 8  | 11 | 9 | 10 | 2  | 8 | Antagonism* | Reported; Reduced lifespan on RNA interference of mir-1 resulted in a decrease in lifespan in <i>C. elegans</i> . | Pro-Longevity:                                                                                                                                                                                                                                                                                                                                                                                                                                                                                                                          | NA         | Yes | Group 3 | GenAge            |                                                                                                                                                                                                                                                                                                                                                                                                                                                                                                                                                                                                                                                                                                                                                                                                                                                                                                                                                                                                              |                                                                                                             |
| CASP3  | Peptidase           | Yes | HC | 31 | 9 | 37.7 | 6 | 18 | 0  | 18 | 8 | 7  | 7  | 0 | Antagonism  | Reported; Lifespan extension                                                                                      | Anti-Longevity*<br>RNA interference (co-3) in adulthood resulted in a 19% increase in mean lifespan in <i>C. elegans</i> .                                                                                                                                                                                                                                                                                                                                                                                                              | Antagonism | Yes | Group 1 | GenAge            | Tumor suppressor gene<br>treatment in trials.                                                                                                                                                                                                                                                                                                                                                                                                                                                                                                                                                                                                                                                                                                                                                                                                                                                                                                                                                                | PMID: 1741345                                                                                               |
| TGFBI  | Growth factor       | Yes | HC | 32 | 9 | 39.1 | 7 | 21 | 18 | 3  | 7 | 9  | 5  | 4 | Antagonism  | Reported; Lifespan extension                                                                                      | Anti-Longevity:<br>daw (RNAi) increased lifespan by 35% in <i>Drosophila</i> .<br>Muscle-specific daw (RNAi) increased lifespan by 11% while fat specific daw (RNAi) decreased lifespan (PMID: 24244197).                                                                                                                                                                                                                                                                                                                               | Antagonism | Yes | Group 1 | GenAge            | TGFBI inhibitor or binding agent was investigated for cancer treatment in trials.<br>Upregulation of TGF- $\beta$ ligands contribute to cell degeneration, tissue fibrosis, inflammation, decreased regenerative capacity, and metabolic malfunction.                                                                                                                                                                                                                                                                                                                                                                                                                                                                                                                                                                                                                                                                                                                                                        | PMID: 3168594                                                                                               |
| NOTCH1 | Receptor            | Yes | HC | 33 | 9 | 43.7 | 5 | 16 | 6  | 10 | 6 | 9  | 4  | 5 | Antagonism  | Reported; Lifespan extension                                                                                      | Anti-Longevity*<br>gfp-1 (RNAi) increased lifespan by 33% in <i>C. elegans</i> .<br>A temperature-sensitive gfp-1 mutant, which lacks a germline, is long-lived at the non-permissive temperature in <i>C. elegans</i> .                                                                                                                                                                                                                                                                                                                | Antagonism | Yes | Group 1 | GenAge;SynergyAge | Tumor suppressor gene.<br>NOTCH1 inhibitory antibody was investigated in metastatic colorectal cancer (p) completed, NCT00316911                                                                                                                                                                                                                                                                                                                                                                                                                                                                                                                                                                                                                                                                                                                                                                                                                                                                             | PMID: 22291607,<br>PMID: 26573790,<br>PMID: 21906406                                                        |
| KRAS   | Hydrolase           | Yes | HC | 34 | 9 | 44.9 | 3 | 20 | 1  | 19 | 9 | 9  | 7  | 2 | Antagonism  | Not reported                                                                                                      | No evidence                                                                                                                                                                                                                                                                                                                                                                                                                                                                                                                             | NA         | Yes | Group 4 | -                 | Antagonist for cancer.<br>KRAS inhibitor such as sotorasib was approved for cancer.<br>Genetic inhibition of Ras was found to extend lifespan.<br>Adult-onset administration of the drug trametinib inhibiting MAP2K1 and MAP2K2, a highly specific inhibitor of Ras-Erk-ETS signaling, extended lifespan in <i>Drosophila</i> .                                                                                                                                                                                                                                                                                                                                                                                                                                                                                                                                                                                                                                                                             | PMID: 2621709,<br>PMID: 26119340                                                                            |
| HDAC1  | Hydrolase           | Yes | HC | 35 | 9 | 47.6 | 7 | 24 | 6  | 18 | 2 | 10 | 9  | 1 | Antagonism  | Reported; Lifespan extension                                                                                      | Anti-Longevity:<br>Hypomorphic mutation increased lifespan by 33 - 52% in <i>Drosophila</i> .<br>Heterogeneous mutation increased male lifespan by 41 - 47%, while no change in median of female lifespan.<br>Rpd3 activity is reduced by caloric restriction, which causes the increase in Sic2 activity and lifespan extension in <i>Drosophila</i> .<br>Pro-Longevity:<br>Gain-of-function (H27.274) and daf-12 (VDR) increased lifespan significantly while loss-of-function (H61H411) and daf-12 decreased lifespan significantly. | Antagonism | Yes | Group 1 | GenAge;SynergyAge | Antagonist for cancer: HDAC1 inhibitors, vorinostat and romidepsin were approved for the treatment of cutaneous T-cell lymphoma.<br>Inactivating histone deacetylase HDA promotes longevity by mobilizing rehnase metabolism.                                                                                                                                                                                                                                                                                                                                                                                                                                                                                                                                                                                                                                                                                                                                                                                | PMID: 12459380,<br>PMID: 3793287,<br>PMID: 10512855,<br>PMID: 15520384                                      |
| VDR    | Nuclear receptor    | Yes | HC | 36 | 9 | 48.0 | 1 | 14 | 1  | 13 | 0 | 7  | 6  | 1 | Agonism*    | Reported; Lifespan extension                                                                                      | Double mutation daf-2 (HGF-1) and daf-12 increased lifespan with a synergistic effect but single null mutation daf-12 shorten lifespan.<br>Deletion nhr-8(ok186) extended lifespan in <i>C. elegans</i> .<br>However, two other studies showed deletion nhr-8(ok186) did not affect lifespan in <i>C. elegans</i> .                                                                                                                                                                                                                     | Agonism    | Yes | Group 1 | GenAge;SynergyAge | VDR agonist were investigated for cancer.<br>VDR knockout mice showed several aging related phenotypes, including poorer survival.                                                                                                                                                                                                                                                                                                                                                                                                                                                                                                                                                                                                                                                                                                                                                                                                                                                                           | PMID: 16620392,<br>PMID: 7798761,<br>PMID: 19500277,<br>PMID: 24654240,<br>PMID: 5290982,<br>PMID: 30125273 |
| TERT   | Transferase         | Yes | HC | 37 | 9 | 54.1 | 8 | 3  | 1  | 2  | 6 | 7  | 6  | 1 | Antagonism  | Reported; Lifespan extension                                                                                      | Pro-Longevity:<br>TERT overexpression (K5-Tert) increased lifespan by 10% in mice.<br>Tert overexpressed cancer-resistant mice increased lifespan by 18%(SPS3/Tert) and 88%(Sp5/Spl6/Sam1/Tert) mice.<br>Tert knock-in mice significantly increased lifespan, and mis-Tert(TERT-ER) knock-in mice significantly decreased lifespan.                                                                                                                                                                                                     | Agonism    | No  | -       | GenAge            | < 7 tissues (out of 47) dysregulated during aging<br>Overexpression of telomerase can inhibit aging but at the expense of increased tumorigenesis.                                                                                                                                                                                                                                                                                                                                                                                                                                                                                                                                                                                                                                                                                                                                                                                                                                                           | PMID: 17502521,<br>PMID: 23213480,<br>PMID: 1568016<br>PMID: 1901273,<br>PMID: 21113150                     |
| TLR4   | Receptor            | Yes | HC | 38 | 8 | 25.3 | 8 | 16 | 10 | 6  | 6 | 8  | 3  | 5 | Antagonism* | Not reported                                                                                                      | No evidence                                                                                                                                                                                                                                                                                                                                                                                                                                                                                                                             | NA         | Yes | Group 4 | -                 | TLR4 is an important pattern recognition receptor (PRR), which activates both innate and adaptive immune cells.<br>Its activation leads to inflammatory cytokine production which is responsible for activating the innate immune system.<br>Adaptive cytokine production (agonists) may not necessary for the healthy but reduced production (antagonists) may alter immune response.<br>The Toll-like receptor 4 (TLR4) signaling pathway is involved in many aspects of biological functions of AML cells, including the regulation of pro-inflammatory cytokine products, myeloid differentiation, and Antagonist for cancer, as our data showed NME1 upregulation in cancers.<br>However, NME1 is considered as (1) metastasis suppressor and (2) metastasis promoter.<br>NME1 depletion resulted in significantly more rapid migration of neuroblastoma cells.<br>NME1 protects against neurotoxic, $\alpha$ -Synuclein- and LRRK2-induced neurite degeneration in cell models of Parkinson's disease. | PMID: 3250831,<br>PMID: 30336978                                                                            |
| NME1   | Unclassified kinase | No  | HC | 39 | 8 | 39.4 | 2 | 8  | 0  | 8  | 0 | 10 | 10 | 0 | Antagonism  | Reported; Lifespan extension                                                                                      | Anti-Longevity*<br>nhr-1 (RNAi) increased lifespan ~5% in <i>C. elegans</i> .                                                                                                                                                                                                                                                                                                                                                                                                                                                           | Antagonism | Yes | Group 1 | GenAge            |                                                                                                                                                                                                                                                                                                                                                                                                                                                                                                                                                                                                                                                                                                                                                                                                                                                                                                                                                                                                              |                                                                                                             |
| FGF2   | Growth factor       | Yes | HC | 40 | 8 | 43.9 | 7 | 14 | 11 | 3  | 6 | 10 | 1  | 9 | Antagonism* | Not reported                                                                                                      | No evidence                                                                                                                                                                                                                                                                                                                                                                                                                                                                                                                             | NA         | Yes | Group 4 | -                 | FGF2 is a major pro-angiogenic factor during tumor angiogenesis but FGF2 (or HGF) is nonprotective for healthy aging.<br>It can improve motor function recovery, increase tyrosine hydroxylase positive neuron survival, and upregulate the levels of neurotransmitters in the brain of a rat model of Parkinson's disease.                                                                                                                                                                                                                                                                                                                                                                                                                                                                                                                                                                                                                                                                                  | PMID: 30274251                                                                                              |
| CXCR4  | GPCR                | Yes | HC | 41 | 8 | 44.0 | 5 | 23 | 22 | 1  | 6 | 9  | 7  | 2 | Antagonism  | Not reported                                                                                                      | No evidence                                                                                                                                                                                                                                                                                                                                                                                                                                                                                                                             | NA         | Yes | Group 4 | -                 | Antagonist for cancer: CXCR4 overexpression contributes to tumor growth, progression and metastasis.<br>CXCR4 gene deletion in young mesenchymal stem cells accelerates an aging phenotype including increased production of reactive oxygen species, DNA damage, senescence, and reduced proliferation.<br>In contrast, CXCL12/CXCR4 promotes inflammation. Targeting CXCR4 for anti-tumor may be suitable for aged adults only.                                                                                                                                                                                                                                                                                                                                                                                                                                                                                                                                                                            | PMID: 26848769,<br>PMID: 32418119                                                                           |
| FASN   | Acytransferase      | Yes | HC | 42 | 8 | 48.0 | 3 | 18 | 1  | 17 | 1 | 7  | 6  | 1 | Antagonism  | Not reported                                                                                                      | No evidence                                                                                                                                                                                                                                                                                                                                                                                                                                                                                                                             | NA         | Yes | Group 4 | -                 | FASN inhibitor prevented the initiation of senescence induction in hematopoietic stem cells and reduced the effect of the activation of senescence on different age-associated diseases.<br>DHEP/DEP (increasing fat-1 expression, and affecting other lipid metabolic genes) treated <i>C. elegans</i> lifespan decreased.                                                                                                                                                                                                                                                                                                                                                                                                                                                                                                                                                                                                                                                                                  | PMID: 30962418,<br>PMID: 29020644                                                                           |
| PDGFRB | Receptor kinase     | Yes | HC | 43 | 8 | 48.4 | 6 | 18 | 12 | 6  | 6 | 10 | 5  | 5 | Antagonism  | Not reported                                                                                                      | No evidence                                                                                                                                                                                                                                                                                                                                                                                                                                                                                                                             | NA         | Yes | Group 4 | -                 | Antagonist for cancer.<br>PDGFR- $\beta$ signaling in the cardiovascular system may regulate angiogenesis in the heart in response to load-induced stress through several different mechanisms.<br>Imatinib mesylate inhibiting PDGFRB, ABL1, KIT, BCR reduced lifespan in <i>C. elegans</i> .                                                                                                                                                                                                                                                                                                                                                                                                                                                                                                                                                                                                                                                                                                               | PMID: 20071776,<br>PMID: 3201088                                                                            |

| Gene   | Enzyme            | Yes | HC | 44 | 8 | 64.0 | 3  | Cellular senescence, Genomic instability, Impaired proteostasis                                                                                                                                                                                      | 13 | 9 | 4  | 7  | 7  | 6  | 1 | Antagonism  | Not reported                    | No evidence                                                                                                                                                                                                                                                                                                                                                                         | NA         | Yes | Group 4 | -                    | Antagonist for cancer; oncoprotein Mdm2 in cancer<br>MDM2 is a negative regulator of p53, a tumor suppressor gene.<br>Dominant-negative versions of <i>Drosophila</i> melanogaster p53 in adult neurons extends lifespan.<br>Taken together, antagonizing MDM2 may result in increased p53 activities, which in turn contribute to accelerated aging.<br>However, small-molecule MDM2 antagonists attenuate the senescence-associated secretory phenotype.<br>Ubiquitous overexpression of wild-type p53 in adult flies also shortened lifespan in females but increased life span in males.<br>MDM2 antagonist (MS-319) increased lifespan in mice with severe combined immunodeficiency. | PMD1-2040290,<br>PMD1-1430358,<br>PMD1-2179512,<br>PMD1-1995844                                                                                                       |               |
|--------|-------------------|-----|----|----|---|------|----|------------------------------------------------------------------------------------------------------------------------------------------------------------------------------------------------------------------------------------------------------|----|---|----|----|----|----|---|-------------|---------------------------------|-------------------------------------------------------------------------------------------------------------------------------------------------------------------------------------------------------------------------------------------------------------------------------------------------------------------------------------------------------------------------------------|------------|-----|---------|----------------------|--------------------------------------------------------------------------------------------------------------------------------------------------------------------------------------------------------------------------------------------------------------------------------------------------------------------------------------------------------------------------------------------------------------------------------------------------------------------------------------------------------------------------------------------------------------------------------------------------------------------------------------------------------------------------------------------|-----------------------------------------------------------------------------------------------------------------------------------------------------------------------|---------------|
| TGFB2  | Receptor kinase   | No  | HC | 45 | 7 | 35.4 | 5  | Aberrant intercellular communications, Deregulated nutrient signaling, Extracellular matrix stiffness, Genomic instability, Stem cell exhaustion                                                                                                     | 12 | 4 | 8  | 7  | 8  | 2  | 6 | Antagonism* | Reported; Lifespan extension    | daf-1 mutants in adults increased mean lifespan by up to 120% and maximum lifespan by up to 185% in <i>C. elegans</i> .                                                                                                                                                                                                                                                             | Antagonism | Yes | Group 1 | GenAge               | Tgfb2-deficient tumors enhanced the survival and reduced tumor weight                                                                                                                                                                                                                                                                                                                                                                                                                                                                                                                                                                                                                      | PMD1-1790898,<br>PMD1-3160988                                                                                                                                         |               |
| BUB1B  | Protein kinase    | No  | HC | 46 | 7 | 37.7 | 2  | Genomic instability, Impaired proteostasis                                                                                                                                                                                                           | 15 | 2 | 13 | 4  | 11 | 11 | 0 | Antagonism  | Reported; Lifespan extension    | Pro-Longevity: T23 mice (BUB1B overexpression) increased lifespan in mice; Hypomorphic BUB1B mice decreased lifespan by 50% in mice                                                                                                                                                                                                                                                 | Agonism    | Yes | Group 2 | GenAge               | Tumor suppressor gene                                                                                                                                                                                                                                                                                                                                                                                                                                                                                                                                                                                                                                                                      | PMD1-2324215,<br>PMD1-1520829                                                                                                                                         |               |
| CASP8  | Peptidase         | Yes | HC | 47 | 7 | 39.4 | 6  | Aerosol intercellular communications, Epigenetic shift, Genomic instability, Impaired proteostasis, Inflammation, Stem cell exhaustion                                                                                                               | 13 | 5 | 8  | 7  | 11 | 11 | 0 | Antagonism  | Reported; Lifespan extension    | Anti-Longevity: RNA interference (esi-3) in adulthood resulted in a 19% increase in mean lifespan in <i>C. elegans</i> .                                                                                                                                                                                                                                                            | Antagonism | Yes | Group 1 | GenAge               | Tumor suppressor gene<br>Caspase-8 may either promote or suppress tumor malignancy. Upon activation, its main function is to promote apoptosis.                                                                                                                                                                                                                                                                                                                                                                                                                                                                                                                                            | PMD1-17411345,<br>PMD1-20817393                                                                                                                                       |               |
| AURKB  | Protein kinase    | Yes | HC | 48 | 7 | 43.6 | 5  | Cellular senescence, Genomic instability, Inflammation, Stem cell exhaustion, Telomere attrition                                                                                                                                                     | 11 | 1 | 10 | 0  | 11 | 11 | 0 | Antagonism  | Not reported                    | No evidence                                                                                                                                                                                                                                                                                                                                                                         | NA         | Yes | Group 4 | -                    | Antagonist for cancer.<br>AURKA is involved in cell cycle checkpoint during healthy aging                                                                                                                                                                                                                                                                                                                                                                                                                                                                                                                                                                                                  | PMD1-17411345,<br>PMD1-20817393                                                                                                                                       |               |
| MAP2K1 | Protein kinase    | Yes | HC | 49 | 7 | 43.6 | 3  | Cellular senescence, Mitochondrial dysfunction, Stem cell exhaustion                                                                                                                                                                                 | 20 | 0 | 20 | 10 | 9  | 6  | 3 | Antagonism  | Reported; Lifespan extension    | Anti-Longevity: Trametinib inhibiting MAP2K1 increased lifespan by 12% in <i>Drosophila</i> .                                                                                                                                                                                                                                                                                       | Antagonism | Yes | Group 1 | ge,GenAge, Geneprote | Antagonist for cancer.<br>Constitutive expression of MEK1 (MAP2K1) caused cells to senesce.                                                                                                                                                                                                                                                                                                                                                                                                                                                                                                                                                                                                | PMD1-20624915,<br>PMD1-20119340,<br>PMD1-1470121                                                                                                                      |               |
| CREBBP | Acyltransferase   | Yes | HC | 50 | 7 | 44.1 | 6  | Aberrant intercellular communications, Cellular senescence, Epigenetic shift, Extracellular matrix stiffness, Genomic instability, Impaired proteostasis                                                                                             | 13 | 0 | 13 | 7  | 4  | 2  | 2 | Antagonism* | Reported; Lifespan extension    | Anti-Longevity: RNA interference increased mean lifespan up to 18% in <i>C. elegans</i> (dependent upon functional daf-16).<br>Knockout mutants lived up to 33% longer in <i>C. elegans</i> (dependent upon functional daf-16).<br>cep-1 deletion (gk130) (tg1250) increased lifespan in <i>C. elegans</i> .                                                                        | Antagonism | Yes | Group 1 | GenAge, SynergyAge   | Tumor suppressor gene<br>Both TSG and oncoproteins roles have been reported<br>CREBBP inhibitor was investigated in colorectal adenocarcinoma (p2 withdrawal, NCT02413853)                                                                                                                                                                                                                                                                                                                                                                                                                                                                                                                 | PMD1-1709432,<br>PMD1-19416129                                                                                                                                        |               |
| TOP2A  | Isomerase         | Yes | HC | 51 | 7 | 45.6 | 5  | Cellular senescence, Epigenetic shift, Genomic instability, Impaired proteostasis, Stem cell exhaustion                                                                                                                                              | 17 | 1 | 16 | 0  | 11 | 11 | 0 | Antagonism  | Not reported                    | No evidence                                                                                                                                                                                                                                                                                                                                                                         | NA         | Yes | Group 4 | -                    | Antagonist for cancer.<br>TOP2A is involved in cell cycle regulation during healthy aging.<br>Topoisomerases regulate the topological states of DNA and important for neuron proliferation                                                                                                                                                                                                                                                                                                                                                                                                                                                                                                 | PMD1-7980433                                                                                                                                                          |               |
| MAPK1  | CMGC kinase       | Yes | HC | 52 | 7 | 46.3 | 7  | Aerosol intercellular communications, Cellular senescence, Genomic instability, Impaired proteostasis, Mitochondrial dysfunction, Stem cell exhaustion, Telomere attrition                                                                           | 27 | 0 | 27 | 9  | 7  | 4  | 3 | Antagonism  | Reported; Reduced lifespan only | Pro-Longevity: <i>Mpk-1 RNAi</i> decreased lifespan in <i>C. elegans</i>                                                                                                                                                                                                                                                                                                            | NA         | Yes | Group 3 | GenAge               | Antagonist for cancer.<br>Age-associated selective impairment in the MAPK signaling pathways in the aged brain.<br>Lifelong caloric restriction completely prevented the age-related decrease in total brain ERK activity and diminished the age-related reduction of p38 MAPK activity.                                                                                                                                                                                                                                                                                                                                                                                                   | PMD1-20624915,<br>PMD1-10647961,<br>PMD1-10558995                                                                                                                     |               |
| EP300  | Acyltransferase   | Yes | HC | 53 | 7 | 50.4 | 8  | Aberrant intercellular communications, Cellular senescence, Epigenetic shift, Extracellular matrix stiffness, Genomic instability, Impaired proteostasis, Inflammation, Mitochondrial dysfunction                                                    | 23 | 0 | 23 | 6  | 6  | 4  | 2 | Antagonism  | Reported; Lifespan extension    | Anti-Longevity: RNA interference (esp-1) increased mean lifespan up to 38% in <i>C. elegans</i> (dependent upon functional daf-16).<br>Knockout mutants lived up to 33% longer in <i>C. elegans</i> (dependent upon functional daf-16).<br>RNAi resulted in a 30% and maximal lifespan increased by 20% and 10% respectively in <i>C. elegans</i> .                                 | Antagonism | Yes | Group 1 | GenAge               | Tumor suppressor gene                                                                                                                                                                                                                                                                                                                                                                                                                                                                                                                                                                                                                                                                      | PMD1-17898432,<br>PMD1-17894432,<br>PMD1-20346071                                                                                                                     |               |
| ERBB3  | Receptor kinase   | Yes | HC | 54 | 7 | 51.3 | 4  | Cellular senescence, Deregulated nutrient signaling, Epigenetic shift, Genomic instability, Impaired proteostasis                                                                                                                                    | 11 | 3 | 8  | 5  | 11 | 9  | 2 | Antagonism  | Reported; Lifespan extension    | Pro-Longevity: Let-23 mutants (reduction-of-function) survive less robustly in middle adulthood than matched wild type controls (9% decrease of median lifespan, 8% decrease of maximum lifespan) (PMD1-2049712).<br>Let-23 mutants (gain-of-function) survive more robustly in middle adulthood (29% increase of median lifespan, 9% increase of maximum lifespan) (PMD1-2049712)* | Agonism    | Yes | Group 2 | GenAge               | Antagonist for cancer.<br>ERBB3 is necessary for maturation and myelination of oligodendrocytes, specialized glial cells that myelinate CNS axons                                                                                                                                                                                                                                                                                                                                                                                                                                                                                                                                          | PMD1-33370356,<br>PMD1-20497132                                                                                                                                       |               |
| NRAS   | Hydrolase         | No  | HC | 55 | 7 | 54.4 | 0  | -                                                                                                                                                                                                                                                    | 25 | 0 | 25 | 9  | 9  | 9  | 0 | Antagonism  | Reported; Reduced lifespan only | Anti-Longevity: let-60 gain-of-function significantly reduced lifespan in <i>C. elegans</i> .                                                                                                                                                                                                                                                                                       | NA         | No  | -       | -                    | GenAge                                                                                                                                                                                                                                                                                                                                                                                                                                                                                                                                                                                                                                                                                     | Target did not associate with any aging hallmarks                                                                                                                     | PMD1-16164423 |
| KDM1A  | Oxidoreductase    | Yes | HC | 56 | 7 | 54.9 | 6  | Cellular senescence, Deregulated nutrient signaling, Epigenetic shift, Genomic instability, Impaired proteostasis, Stem cell exhaustion                                                                                                              | 27 | 1 | 26 | 0  | 10 | 10 | 0 | Antagonism  | Not reported                    | No evidence                                                                                                                                                                                                                                                                                                                                                                         | NA         | Yes | Group 4 | -                    | Antagonist for cancer.<br>KDM1A, is a drug target of IMG-7289, lysine-specific demethylase 1 inhibitor, investigated for the treatment of leukemia in trial (NCT02842827).<br>Modulation of KDM1A with valdemoran (KDM1A inhibitor) rescues memory deficit and behavioral aberrations in mice                                                                                                                                                                                                                                                                                                                                                                                              | PMD1-32460975                                                                                                                                                         |               |
| PRKDC  | Protein kinase    | Yes | HC | 57 | 7 | 55.1 | 9  | Aberrant intercellular communications, Cellular senescence, Deregulated nutrient signaling, Epigenetic shift, Genomic instability, Impaired proteostasis, Inflammation, Stem cell exhaustion, Telomere attrition                                     | 29 | 0 | 29 | 0  | 11 | 11 | 0 | Antagonism  | Reported; Lifespan extension    | Pro-Longevity: mei-41 overexpression increased lifespan in <i>Drosophila</i> .<br>mei-41 mutant decreased lifespan in <i>Drosophila</i> .<br>Diminished lifespan and acute stress-induced death in DNA-PCRs-deficient mice with limiting telomeres.<br>However, a study demonstrated the anti-longevity of PRKDC in <i>C. elegans</i> , and <i>adl-1</i> deletion                   | Agonism    | Yes | Group 2 | -                    | Antagonist for cancer.<br>PRKDC is involved in DNA double-strand break repair and innate immune system during healthy aging                                                                                                                                                                                                                                                                                                                                                                                                                                                                                                                                                                | PMD1-6411485,<br>PMD1-14520302,<br>PMD1-23434802,<br>PMD1-17072335                                                                                                    |               |
| FGFR2  | Receptor kinase   | Yes | HC | 58 | 7 | 58.7 | 4  | Aberrant intercellular communications, Extracellular matrix stiffness, Genomic instability, Stem cell exhaustion                                                                                                                                     | 16 | 4 | 12 | 6  | 9  | 2  | 7 | Antagonism* | Not reported                    | No evidence                                                                                                                                                                                                                                                                                                                                                                         | NA         | Yes | Group 4 | -                    | Antagonist for cancer but our data showed FGFR2 downregulation in cancer.<br>FGFR2 is important for cell division, cell maturation, formation of new blood vessels, wound healing, and bone growth and development                                                                                                                                                                                                                                                                                                                                                                                                                                                                         | PMD1-20116689,<br>PMD1-12933418,<br>PMD1-22121295,<br><a href="https://www.biorxiv.org/content/10.1101/095249v1">https://www.biorxiv.org/content/10.1101/095249v1</a> |               |
| EZH2   | Methyltransferase | Yes | HC | 59 | 7 | 59.3 | 4  | Cellular senescence, Epigenetic shift, Inflammation, Stem cell exhaustion                                                                                                                                                                            | 9  | 3 | 6  | 9  | 11 | 11 | 0 | Antagonism  | Reported; Lifespan extension    | Anti-Longevity: Heterogeneous mutation at amino acid 63/731 increased lifespan by 71% - 70% while heterogeneous mutation at amino acid 63 increased lifespan by 33% in <i>Drosophila</i> .<br>EZH2 mutants were long-lived due to increased resistance to oxidative stress and starvation in <i>Drosophila</i> .<br>RNAi mes-2 increased lifespan by 6.5% in <i>C. elegans</i> .    | Antagonism | Yes | Group 1 | GenAge, SynergyAge   | Inhibitor of EZH2 attenuates neuroinflammation<br>Microglial EZH2 inhibition leads to neuroprotection after stroke in aged mice                                                                                                                                                                                                                                                                                                                                                                                                                                                                                                                                                            | PMD1-20116689,<br>PMD1-12933418,<br>PMD1-22121295,<br><a href="https://www.biorxiv.org/content/10.1101/095249v1">https://www.biorxiv.org/content/10.1101/095249v1</a> |               |
| PPARA  | Nuclear receptor  | Yes | HC | 60 | 7 | 61.6 | 11 | Aerosol intercellular communications, Deregulated nutrient signaling, Epigenetic shift, Extracellular matrix stiffness, Genomic instability, Impaired proteostasis, Inflammation, Mitochondrial dysfunction, Retrorasoposition, Stem cell exhaustion | 22 | 1 | 21 | 2  | 8  | 1  | 7 | Agonism     | Reported; Lifespan extension    | Pro-Longevity: Clofibrate and fenofibrate agonizing PPARA extended lifespan in <i>C. elegans</i> .                                                                                                                                                                                                                                                                                  | Agonism    | Yes | Group 1 | JmgAge, Geteroprotec | Agonist for cancer.<br>PPARy agonists delay age-associated metabolic disease and extend longevity.<br>Bezafibrate agonizing PPARA, PPAR $\delta$ and PPAR $\gamma$ extended lifespan in <i>C. elegans</i> .<br>Bezafibrate, clofibrate, bezafibrate, and fenofibrate failed to extend lifespan in <i>C. elegans</i> in absence of NHR-49                                                                                                                                                                                                                                                                                                                                                   | PMD1-33219735,<br>PMD1-2360380                                                                                                                                        |               |

| Gene   | Enzyme               | Yes | HC | 61 | 7 | 62.9 | 4  | Cellular senescence, Extracellular matrix stiffness, Genomic instability, Inflammation                                                                                                                                                                                                          | 17 | 10 | 7  | 10 | 8  | 7  | 1 | Antagonism  | Reported; Reduced lifespan only | 1st-60n(1046gf) mutation decreased lifespan in <i>C. elegans</i> .                                                                                                                                                                                                                                                                                                                                                                                                                                                                                                                                                                           | Pro-Longevity: NA          | Yes | Group 3 | GenAge             | Antagonist for cancer. Deregulation of the Egr1/Ras signaling pathway induces age-related brain degeneration in the <i>Drosophila</i> . Expression of HRAS in lung fibroblasts resulted in a permanent G1 arrest, accompanied by accumulation of senescence associated factors, p53 and p16.                                                                                                              | PMID: 12529440, PMID: 905499, PMID: 1616423                                                                                                                                                                                                 |
|--------|----------------------|-----|----|----|---|------|----|-------------------------------------------------------------------------------------------------------------------------------------------------------------------------------------------------------------------------------------------------------------------------------------------------|----|----|----|----|----|----|---|-------------|---------------------------------|----------------------------------------------------------------------------------------------------------------------------------------------------------------------------------------------------------------------------------------------------------------------------------------------------------------------------------------------------------------------------------------------------------------------------------------------------------------------------------------------------------------------------------------------------------------------------------------------------------------------------------------------|----------------------------|-----|---------|--------------------|-----------------------------------------------------------------------------------------------------------------------------------------------------------------------------------------------------------------------------------------------------------------------------------------------------------------------------------------------------------------------------------------------------------|---------------------------------------------------------------------------------------------------------------------------------------------------------------------------------------------------------------------------------------------|
| ABL1   | Tyrosine kinase      | Yes | HC | 62 | 7 | 70.7 | 9  | Ahered intercellular communications, Cellular senescence, Epigenetic shift, Extracellular matrix stiffness, Genomic instability, Impaired proteostasis, Inflammation, Mitochondrial dysfunction                                                                                                 | 16 | 7  | 9  | 7  | 9  | 5  | 4 | Antagonism  | Not reported                    | No evidence                                                                                                                                                                                                                                                                                                                                                                                                                                                                                                                                                                                                                                  | NA                         | Yes | Group 4 | -                  | Antagonist for cancer but ABL1 is important for DNA double-strand break repair during healthy aging. Senolytic treatment reduces cell senescence. Quercetin, senolytic drug, inhibits multiple kinases including ABL1. Pro-Longevity: Imatinib methylate inhibiting ABL1 reduced lifespan in <i>C. elegans</i> .                                                                                          | PMID: 320108                                                                                                                                                                                                                                |
| SIRT1  | Acytransferase       | Yes | HC | 63 | 7 | 73.3 | 12 | Ahered intercellular communications, Cellular senescence, Deregulated nutrient signaling, Epigenetic shift, Extracellular matrix stiffness, Genomic instability, Impaired proteostasis, Inflammation, Mitochondrial dysfunction, Retrospermatogenesis, Stem cell exhaustion, Telomere attrition | 15 | 2  | 13 | 3  | 8  | 1  | 7 | Antagonism* | Reported; Lifespan extension    | Loss of dSirt2 decreased lifespan by 5.9% and 26.1% in <i>Drosophila</i> . Overexpression of dSirt2 increased lifespan by 57% in <i>Drosophila</i> . mTERT treatment increased sirt1 expression and extended lifespan in mice. However, two studies showed SIRT1 overexpression did not affect lifespan in mice, and overexpression of dSirt2 did not result in increased lifespan in <i>Drosophila</i> . Two 14-3-3 proteins (SRP-2.1 binding partners) were required for the lifespan extension conferred by extra copies of sirt-2.1 in <i>C. elegans</i> . Overexpressing sirt-2.1 conferred a lifespan extension in <i>C. elegans</i> . | Agonism                    | Yes | Group 2 | GenAge, SynergyAge | Antagonist for cancer, although our data showed that there were downregulation in 4 cancers. SIRT1 can act as an oncogene or tumor suppressor in cancer. Inhibition of SIRT1 activity would be beneficial for cancer treatment. SIRT1 could reduce p53-mediated apoptosis. High levels of SIRT1 expression as a protective mechanism against disease-related conditions.                                  | PMID: 11242885, PMID: 16280150, PMID: 29975665, PMID: 2401076, PMID: 17877786, PMID: 24020000, PMID: 3073331, PMID: 21938067, PMID: 27560991, PMID: 17192925, PMID: 1520384, PMID: 19775016, PMID: 16777605, PMID: 21909281, PMID: 34389865 |
| PIPRC  | Receptor phosphatase | Yes | HC | 64 | 7 | 81.4 | 4  | Ahered intercellular communications, Genomic instability, Inflammation, Stem cell exhaustion                                                                                                                                                                                                    | 15 | 10 | 5  | 3  | 8  | 5  | 3 | Antagonism* | Reported; reduced lifespan only | Pro-Longevity: pprpc-/- decreased lifespan in mice.                                                                                                                                                                                                                                                                                                                                                                                                                                                                                                                                                                                          | NA                         | Yes | Group 3 | -                  | Tumor suppressor gene BCR1311, antibody drug & PIPRC binding agent, was investigated in clinical trials for cancer treatment.                                                                                                                                                                                                                                                                             | PMID: 3082040                                                                                                                                                                                                                               |
| TYMS   | Methyltransferase    | Yes | HC | 65 | 6 | 33.2 | 3  | Inflammation, Mitochondrial dysfunction, Stem cell exhaustion                                                                                                                                                                                                                                   | 14 | 8  | 6  | 0  | 11 | 11 | 0 | Antagonism  | Reported; Lifespan extension    | Flouxuridine (40 μM) extended lifespan in <i>C. elegans</i> , while a higher dose i.e. 5000 μM shortened their lifespans.                                                                                                                                                                                                                                                                                                                                                                                                                                                                                                                    | Antagonism                 | Yes | Group 1 | DrugAge            | Antagonist for cancer. TYMS is involved in cell cycle regulation during healthy aging.                                                                                                                                                                                                                                                                                                                    | PMID: 153363                                                                                                                                                                                                                                |
| RAC1   | Hydrolase            | No  | HC | 66 | 6 | 38.5 | 6  | Ahered intercellular communications, Deregulated nutrient signaling, Epigenetic shift, Extracellular matrix stiffness, Genomic instability, Inflammation                                                                                                                                        | 16 | 1  | 15 | 9  | 10 | 9  | 1 | Antagonism  | Not reported                    | No evidence                                                                                                                                                                                                                                                                                                                                                                                                                                                                                                                                                                                                                                  | NA                         | Yes | Group 4 | -                  | Antagonist for cancer. RAC1 is involved in adaptive immune system and innate immune system during healthy aging.                                                                                                                                                                                                                                                                                          |                                                                                                                                                                                                                                             |
| SRC    | Tyrosine kinase      | Yes | HC | 67 | 6 | 47.5 | 11 | Extracellular matrix stiffness, Genomic instability, Impaired proteostasis, Inflammation, Mitochondrial dysfunction, Stem cell exhaustion                                                                                                                                                       | 10 | 3  | 7  | 6  | 8  | 7  | 1 | Antagonism  | Not reported                    | Not reported                                                                                                                                                                                                                                                                                                                                                                                                                                                                                                                                                                                                                                 | NA                         | Yes | Group 4 | -                  | Antagonist for cancer. Dasatinib, SRC inhibitor, was used for cancer treatment. Dasatinib was also considered as senolytic use to remove senescent cell.                                                                                                                                                                                                                                                  |                                                                                                                                                                                                                                             |
| CDC25A | Esterase             | No  | HC | 68 | 6 | 49.3 | 2  | Genomic instability, Impaired proteostasis, Ahered intercellular communications, Deregulated nutrient signaling, Epigenetic shift, Extracellular matrix stiffness, Genomic instability, Impaired proteostasis, Inflammation, Telomere attrition                                                 | 16 | 1  | 15 | 1  | 11 | 11 | 0 | Antagonism  | Reported; Lifespan extension    | cdc-25.3 (RNAi) significantly increased lifespan in <i>C. elegans</i> .                                                                                                                                                                                                                                                                                                                                                                                                                                                                                                                                                                      | Anti-Longevity: Antagonism | Yes | Group 1 | GenAge             | Antagonist for cancer. CDC25A is thought to be a proto-oncogene. CDC25A is involved for cell cycle regulation.                                                                                                                                                                                                                                                                                            | PMID: 1674121, PMID: 13021892                                                                                                                                                                                                               |
| IL1B   | Interleukin          | Yes | HC | 69 | 6 | 49.5 | 8  | Deregulated nutrient signaling, Epigenetic shift, Extracellular matrix stiffness, Genomic instability, Impaired proteostasis, Inflammation, Telomere attrition                                                                                                                                  | 9  | 1  | 8  | 6  | 6  | 3  | 3 | Antagonism  | Not reported                    | No evidence                                                                                                                                                                                                                                                                                                                                                                                                                                                                                                                                                                                                                                  | NA                         | Yes | Group 4 | -                  | IL-1α and IL-1β signal upregulate the senescence-associated secretory phenotype in a cooperative manner. IL-1β promotes the age-associated decline of beta cell function.                                                                                                                                                                                                                                 | PMID: 3098157, PMID: 34746709                                                                                                                                                                                                               |
| FGFR1  | Receptor kinase      | Yes | HC | 70 | 6 | 49.8 | 5  | Cellular senescence, Deregulated nutrient signaling, Extracellular matrix stiffness, Genomic instability, Telomere attrition                                                                                                                                                                    | 16 | 11 | 5  | 7  | 8  | 1  | 7 | Antagonism* | Not reported                    | No evidence                                                                                                                                                                                                                                                                                                                                                                                                                                                                                                                                                                                                                                  | NA                         | Yes | Group 4 | -                  | FGFR1 antagonists such as pemigatinib approved for cancer (NCT01811372) but our data showed FGFR1 upregulation in cancers. Mice with an attenuation of FGFR1 signaling develop diabetes with age and exhibit a decreased number of beta-cells, and lower levels of FGFR1 in mice have also been related to craniofacial defects. Antagonist for cancer although our data showed downregulation in cancer. | PMID: 12514106, PMID: 11130726                                                                                                                                                                                                              |
| KIT    | Receptor kinase      | Yes | HC | 71 | 6 | 51.8 | 6  | Ahered intercellular communications, Cellular senescence, Deregulated nutrient signaling, Genomic instability, Inflammation, Stem cell exhaustion                                                                                                                                               | 17 | 5  | 12 | 6  | 10 | 2  | 8 | Antagonism* | Not reported                    | No evidence                                                                                                                                                                                                                                                                                                                                                                                                                                                                                                                                                                                                                                  | NA                         | Yes | Group 4 | -                  | Adult myocardium relies on c-kit expression to regenerate after injury and to counteract aging effects on cardiac structure and function. Imatinib methylate inhibiting PDGFRB, ABL1, KIT, BCR reduced lifespan in <i>C. elegans</i> .                                                                                                                                                                    | PMID: 31275242, PMID: 32010883                                                                                                                                                                                                              |
| RARB   | Nuclear receptor     | Yes | HC | 72 | 6 | 54.8 | 2  | Genomic instability, Stem cell exhaustion                                                                                                                                                                                                                                                       | 14 | 6  | 8  | 0  | 10 | 1  | 9 | Agonism     | Not reported                    | No evidence                                                                                                                                                                                                                                                                                                                                                                                                                                                                                                                                                                                                                                  | NA                         | Yes | Group 4 | -                  | Agonist for cancer. RAR agonist ameliorated the UV-induced damage to skin collagen fibers, and increased the collagen content in photogaged skin through RAR. Antagonist for cancer. Targeting JNK by RNA interference and inhibitor inhibit the development of hepatocellular carcinomas.                                                                                                                | PMID: 2840147                                                                                                                                                                                                                               |
| MAPK8  | CMGC kinase          | Yes | HC | 73 | 6 | 57.0 | 6  | Cellular senescence, Epigenetic shift, Genomic instability, Impaired proteostasis, Mitochondrial dysfunction, Stem cell exhaustion                                                                                                                                                              | 16 | 1  | 15 | 0  | 7  | 3  | 4 | Antagonism  | Reported; Lifespan extension    | Pro-Longevity: loss-of-function jnk-1 significantly decreased lifespan in <i>C. elegans</i> . jnk-1 overexpression (pkn2) increased lifespan in <i>C. elegans</i> . jnk-1 deficient mice (kn1) decreased lifespan. Btk RNAi decreased lifespan by 16.4% in male and 10.2% in female <i>Drosophila</i> .                                                                                                                                                                                                                                                                                                                                      | Agonism                    | Yes | Group 2 | GenAge, SynergyAge | MAPK8, also known as JNK1. Fruit flies with mutations that augment JNK signaling live longer. Overexpression of JNK in roundworms also increases lifespan. MAPK8 inhibitor was investigated in in myeloid leukemia (p1 terminalid: NCT0120895).                                                                                                                                                           | PMID: 28012230, PMID: 15767565, PMID: 1882074, PMID: 20976269                                                                                                                                                                               |
| CTSB   | Peptidase            | No  | HC | 74 | 6 | 58.8 | 3  | Extracellular matrix stiffness, Genomic instability, Impaired proteostasis                                                                                                                                                                                                                      | 17 | 0  | 17 | 1  | 11 | 8  | 3 | Antagonism  | Not reported                    | No evidence                                                                                                                                                                                                                                                                                                                                                                                                                                                                                                                                                                                                                                  | NA                         | Yes | Group 4 | -                  | Antagonist for cancer. Inhibitors of cathepsin B improve memory and reduce beta-amyloid in transgenic Alzheimer disease mice. Nuclear distribution of cathepsin B in senescent microglia promotes brain aging through degradation of sirtuin.                                                                                                                                                             | PMID: 18184658, PMID: 33049518                                                                                                                                                                                                              |
| DSM2   | Hydrolase            | No  | HC | 75 | 6 | 61.2 | 5  | Ahered intercellular communications, Cellular senescence, Deregulated nutrient signaling, Extracellular matrix stiffness, Genomic instability                                                                                                                                                   | 13 | 3  | 10 | 3  | 10 | 6  | 4 | Antagonism  | Not reported                    | No evidence                                                                                                                                                                                                                                                                                                                                                                                                                                                                                                                                                                                                                                  | NA                         | Yes | Group 4 | -                  | Tumor suppressor gene                                                                                                                                                                                                                                                                                                                                                                                     |                                                                                                                                                                                                                                             |
| RHOA   | Hydrolase            | No  | HC | 76 | 6 | 63.5 | 5  | Ahered intercellular communications, Epigenetic shift, Genomic instability, Inflammation, Stem cell exhaustion                                                                                                                                                                                  | 11 | 1  | 10 | 9  | 6  | 3  | 3 | Antagonism  | Not reported                    | No evidence                                                                                                                                                                                                                                                                                                                                                                                                                                                                                                                                                                                                                                  | NA                         | Yes | Group 4 | -                  | Antagonist for cancer. RHOA is involved in protecting against the progression of cardiac aging.                                                                                                                                                                                                                                                                                                           | <a href="https://pubsubhpc.org/nc/1460843/">https://pubsubhpc.org/nc/1460843/</a>                                                                                                                                                           |

|        |                        |     |    |    |   |      |    |    |    |    |   |    |    |   |             |                              |                                                                                                                                                                                                       |                                                                                                                                                                                                                                                                                                                                                                              |               |         |                       |                                                                                                                                                                                                                                                                                                                                                                                                                                                                                                                                                                                                                                                                                                                                                                                                                                                                                                                                                                                                                                                                                                                                                                                                                                                                                                                                                                                                                                                                                                                                                                                                                                                                                                                                              |                                                                                                                                                                                                                                                                                                                              |                                |
|--------|------------------------|-----|----|----|---|------|----|----|----|----|---|----|----|---|-------------|------------------------------|-------------------------------------------------------------------------------------------------------------------------------------------------------------------------------------------------------|------------------------------------------------------------------------------------------------------------------------------------------------------------------------------------------------------------------------------------------------------------------------------------------------------------------------------------------------------------------------------|---------------|---------|-----------------------|----------------------------------------------------------------------------------------------------------------------------------------------------------------------------------------------------------------------------------------------------------------------------------------------------------------------------------------------------------------------------------------------------------------------------------------------------------------------------------------------------------------------------------------------------------------------------------------------------------------------------------------------------------------------------------------------------------------------------------------------------------------------------------------------------------------------------------------------------------------------------------------------------------------------------------------------------------------------------------------------------------------------------------------------------------------------------------------------------------------------------------------------------------------------------------------------------------------------------------------------------------------------------------------------------------------------------------------------------------------------------------------------------------------------------------------------------------------------------------------------------------------------------------------------------------------------------------------------------------------------------------------------------------------------------------------------------------------------------------------------|------------------------------------------------------------------------------------------------------------------------------------------------------------------------------------------------------------------------------------------------------------------------------------------------------------------------------|--------------------------------|
| JAK2   | Tyrosine kinase        | Yes | HC | 77 | 6 | 67.2 | 9  | 14 | 3  | 11 | 6 | 8  | 1  | 7 | Antagonism* | Reported: Lifespan extension | Anti-Longevity: Heterogenous gain-of-function decreased lifespan significantly in <i>Drosophila</i> . Heterogenous loss-of-function increased lifespan significantly increased in <i>Drosophila</i> . | Antagonism                                                                                                                                                                                                                                                                                                                                                                   | Yes           | Group 1 | GenAge                | Rasolfinib, JAK2 antagonist was investigated for cancer treatment. Inhibition of the JAK pathway partially restored age-related decline in coordination.                                                                                                                                                                                                                                                                                                                                                                                                                                                                                                                                                                                                                                                                                                                                                                                                                                                                                                                                                                                                                                                                                                                                                                                                                                                                                                                                                                                                                                                                                                                                                                                     | PMID: 22594607, PMID: 2678796                                                                                                                                                                                                                                                                                                |                                |
| AKT3   | AGC kinase             | Yes | HC | 78 | 6 | 71.3 | 3  | 25 | 6  | 19 | 9 | 10 | 3  | 7 | Antagonism* | Not reported                 | No evidence                                                                                                                                                                                           | NA                                                                                                                                                                                                                                                                                                                                                                           | Yes           | Group 4 | -                     | AKT3 antagonist such as Capivasertib investigated for cancer but our data showed AKT3 downregulation in cancer. Aging-induced Akt activation involves in aging-related pathologies and AB-induced toxicity                                                                                                                                                                                                                                                                                                                                                                                                                                                                                                                                                                                                                                                                                                                                                                                                                                                                                                                                                                                                                                                                                                                                                                                                                                                                                                                                                                                                                                                                                                                                   | PMID: 3118366                                                                                                                                                                                                                                                                                                                |                                |
| PKM    | Non-protein kinase     | No  | HC | 79 | 6 | 73.2 | 5  | 16 | 1  | 15 | 0 | 10 | 10 | 0 | Antagonism  | Not reported                 | No evidence                                                                                                                                                                                           | NA                                                                                                                                                                                                                                                                                                                                                                           | Yes           | Group 4 | -                     | Antagonist for cancer. PKM is involved in innate immune system during healthy aging. In addition, loss of PKM2 impairs angiogenic sprouting and loss of endothelial PKM2 alters mitochondrial metabolism.                                                                                                                                                                                                                                                                                                                                                                                                                                                                                                                                                                                                                                                                                                                                                                                                                                                                                                                                                                                                                                                                                                                                                                                                                                                                                                                                                                                                                                                                                                                                    | PMID: 3030187                                                                                                                                                                                                                                                                                                                |                                |
| PGR    | Nuclear receptor       | Yes | HC | 80 | 5 | 22.8 | 2  | 17 | 12 | 5  | 0 | 9  | 0  | 9 | Agonism     | Reported: Lifespan extension | Pro-Longevity: Danazol agonism PGR & AR extended lifespan in <i>C. elegans</i> .                                                                                                                      | Agonism                                                                                                                                                                                                                                                                                                                                                                      | Yes           | Group 1 | YngAge, Geroprotector | PGR agonists were investigated for cancer treatment such as breast cancer, endometrial cancer, prostate cancer, liver cancer. Progesterone has multiple non-reproductive functions in the central nervous system to regulate cognition, mood, inflammation, mitochondrial function, neurogenesis and regeneration, myelination and recovery from traumatic brain injury. Antagonist for cancer. NCOA3 (known as AIB1 or RAC3) coactivates E2F1 and promotes breast cancer cell proliferation. NCOA3 promotes bladder cancer cell proliferation through Akt and E2F1. Inhibition of NCOA3 could prevent the development of fibrosis, and ameliorate pre-established fibrosis. NCOA3 overexpression in the non-tumoral HEK293 cells inhibits the premature senescence induced by hydrogen peroxide or rapamycin. The mechanism involves (1) the inhibition of autophagy and (2) the increase in levels and nuclear localization of both the cell cycle suppressors p53/p21 and the longevity promoters FOXO3a, FOXO4 and SIRT1. NCOA3 overexpression is required in order to maintain the telomerase activity. NCOA3 is an inhibitor of senescence whose downregulation in aged individuals could be probably a tumor suppressor mechanism, preventing the clonal expansion of risky old cells from having damaged DNA. Antagonist for cancer. NCOA1 promotes angiogenesis in breast tumors. Aging or ER antagonists were shown to downregulate NCOA1 in the hippocampus of female mice. 17 $\beta$ -estradiol treatment can upregulate NCOA1. Beta-Estradiol was shown to increase lifespan in <i>C. elegans</i> . Taken together, NCOA1 agonist may delay aging. NCOA1 is required for the anti-obesogenic effects of 17 $\beta$ -estradiol. | PMID: 18374402, PMID: 24134630                                                                                                                                                                                                                                                                                               |                                |
| NCOA3  | Acyltransferase        | No  | HC | 81 | 5 | 37.2 | 2  | 17 | 2  | 15 | 1 | 10 | 10 | 0 | Antagonism  | Not reported                 | No evidence                                                                                                                                                                                           | NA                                                                                                                                                                                                                                                                                                                                                                           | Yes           | Group 4 | -                     | NCOA3 overexpression in the non-tumoral HEK293 cells inhibits the premature senescence induced by hydrogen peroxide or rapamycin. The mechanism involves (1) the inhibition of autophagy and (2) the increase in levels and nuclear localization of both the cell cycle suppressors p53/p21 and the longevity promoters FOXO3a, FOXO4 and SIRT1. NCOA3 overexpression is required in order to maintain the telomerase activity. NCOA3 is an inhibitor of senescence whose downregulation in aged individuals could be probably a tumor suppressor mechanism, preventing the clonal expansion of risky old cells from having damaged DNA. Antagonist for cancer. NCOA1 promotes angiogenesis in breast tumors. Aging or ER antagonists were shown to downregulate NCOA1 in the hippocampus of female mice. 17 $\beta$ -estradiol treatment can upregulate NCOA1. Beta-Estradiol was shown to increase lifespan in <i>C. elegans</i> . Taken together, NCOA1 agonist may delay aging. NCOA1 is required for the anti-obesogenic effects of 17 $\beta$ -estradiol.                                                                                                                                                                                                                                                                                                                                                                                                                                                                                                                                                                                                                                                                              | PMID: 23511556, PMID: 26609953                                                                                                                                                                                                                                                                                               |                                |
| NCOA1  | Acyltransferase        | No  | HC | 82 | 5 | 43.6 | 5  | 23 | 6  | 17 | 1 | 8  | 1  | 7 | Antagonism* | Not reported                 | No evidence                                                                                                                                                                                           | NA                                                                                                                                                                                                                                                                                                                                                                           | Yes           | Group 4 | -                     | Aging or ER antagonists were shown to downregulate NCOA1 in the hippocampus of female mice. 17 $\beta$ -estradiol treatment can upregulate NCOA1. Beta-Estradiol was shown to increase lifespan in <i>C. elegans</i> . Taken together, NCOA1 agonist may delay aging. NCOA1 is required for the anti-obesogenic effects of 17 $\beta$ -estradiol.                                                                                                                                                                                                                                                                                                                                                                                                                                                                                                                                                                                                                                                                                                                                                                                                                                                                                                                                                                                                                                                                                                                                                                                                                                                                                                                                                                                            | PMID: 36287601, PMID: 24134630                                                                                                                                                                                                                                                                                               |                                |
| ATM    | Protein kinase         | No  | HC | 83 | 5 | 44.4 | 10 | 13 | 11 | 2  | 2 | 7  | 7  | 4 | 3           | Antagonism                   | Reported: Lifespan extension                                                                                                                                                                          | Pro-Longevity: Lifespan of Terc <sup>-/-</sup> Atm <sup>-/-</sup> significantly decreased compared to Terc <sup>-/-</sup> Atm <sup>+/+</sup> late generation mice. Mutations in ATM in late-generation TERC mutants with short telomeres resulted in signs of premature aging. Anti-Longevity: Deletion allele atm-1(gk186) increased lifespan by 20% in <i>C. elegans</i> . | nsm / Antagon | Yes     | Group 2               | SynergyAge, GenAge                                                                                                                                                                                                                                                                                                                                                                                                                                                                                                                                                                                                                                                                                                                                                                                                                                                                                                                                                                                                                                                                                                                                                                                                                                                                                                                                                                                                                                                                                                                                                                                                                                                                                                                           | Tumor suppressor gene. Low dose of chloroquine (inhibiting multiple genes/proteins) activates rescued age-related metabolic shift, and prolonged replicative lifespan in mice.                                                                                                                                               | PMID: 12540856, PMID: 19416129 |
| EphA2  | Receptor kinase        | Yes | HC | 84 | 5 | 47.6 | 5  | 8  | 5  | 3  | 3 | 4  | 10 | 4 | 6           | Antagonism                   | Reported: Lifespan extension                                                                                                                                                                          | Pro-Longevity: vab-1 overexpression (dcl1) increased lifespan by 20% in <i>C. elegans</i> .                                                                                                                                                                                                                                                                                  | Agonism       | Yes     | Group 2               | GenAge                                                                                                                                                                                                                                                                                                                                                                                                                                                                                                                                                                                                                                                                                                                                                                                                                                                                                                                                                                                                                                                                                                                                                                                                                                                                                                                                                                                                                                                                                                                                                                                                                                                                                                                                       | Antagonist for cancer. EphA2 a promoter of melanoma tumorigenicity                                                                                                                                                                                                                                                           | PMID: 19853560, PMID: 19223760 |
| HDAC2  | Hydrolase              | Yes | HC | 85 | 5 | 48.6 | 7  | 23 | 1  | 22 | 1 | 9  | 9  | 0 | Antagonism  | Not reported                 | No evidence                                                                                                                                                                                           | NA                                                                                                                                                                                                                                                                                                                                                                           | Yes           | Group 4 | -                     | Antagonist for cancer. HDAC2 inhibitors, vorinostat and romidepsin were approved for the treatment of cutaneous T-cell lymphoma. Inactivating histone deacetylase HDAC promotes longevity by mobilizing trehalose metabolism.                                                                                                                                                                                                                                                                                                                                                                                                                                                                                                                                                                                                                                                                                                                                                                                                                                                                                                                                                                                                                                                                                                                                                                                                                                                                                                                                                                                                                                                                                                                | PMID: 33790287                                                                                                                                                                                                                                                                                                               |                                |
| RARA   | Nuclear receptor       | Yes | HC | 86 | 5 | 50.6 | 6  | 13 | 10 | 3  | 0 | 8  | 4  | 4 | Agonism     | Not reported                 | No evidence                                                                                                                                                                                           | NA                                                                                                                                                                                                                                                                                                                                                                           | Yes           | Group 4 | -                     | RARA agonist for cancer. RAR agonist ameliorated the UV-induced damage to skin collagen fibers, and increased the collagen content in photoaged skin through RAR.                                                                                                                                                                                                                                                                                                                                                                                                                                                                                                                                                                                                                                                                                                                                                                                                                                                                                                                                                                                                                                                                                                                                                                                                                                                                                                                                                                                                                                                                                                                                                                            | PMID: 2884147                                                                                                                                                                                                                                                                                                                |                                |
| AKT2   | AGC kinase             | Yes | HC | 87 | 5 | 57.8 | 7  | 17 | 5  | 12 | 9 | 7  | 4  | 3 | Antagonism  | Reported: Lifespan extension | Anti-Longevity: AKT2 knockout mutants increased lifespan by 9.1% in mice.                                                                                                                             | Antagonism                                                                                                                                                                                                                                                                                                                                                                   | Yes           | Group 1 | GenAge                | Aging-induced Akt activation involves in aging-related pathologies and AB-induced toxicity                                                                                                                                                                                                                                                                                                                                                                                                                                                                                                                                                                                                                                                                                                                                                                                                                                                                                                                                                                                                                                                                                                                                                                                                                                                                                                                                                                                                                                                                                                                                                                                                                                                   | PMID: 28681509, PMID: 3118366                                                                                                                                                                                                                                                                                                |                                |
| DNMT3A | Methyltransferase      | Yes | HC | 88 | 5 | 60.0 | 3  | 16 | 3  | 13 | 7 | 11 | 11 | 0 | Antagonism  | Not reported                 | No evidence                                                                                                                                                                                           | NA                                                                                                                                                                                                                                                                                                                                                                           | Yes           | Group 4 | -                     | Constitutive loss of DNMT3A causes morbid obesity through misregulation of adipogenesis                                                                                                                                                                                                                                                                                                                                                                                                                                                                                                                                                                                                                                                                                                                                                                                                                                                                                                                                                                                                                                                                                                                                                                                                                                                                                                                                                                                                                                                                                                                                                                                                                                                      | PMID: 35635747                                                                                                                                                                                                                                                                                                               |                                |
| TNF    | Tumour necrosis factor | Yes | HC | 89 | 5 | 61.6 | 11 | 9  | 1  | 8  | 8 | 7  | 7  | 4 | 3           | Antagonism                   | Not reported                                                                                                                                                                                          | No evidence                                                                                                                                                                                                                                                                                                                                                                  | NA            | Yes     | Group 4               | -                                                                                                                                                                                                                                                                                                                                                                                                                                                                                                                                                                                                                                                                                                                                                                                                                                                                                                                                                                                                                                                                                                                                                                                                                                                                                                                                                                                                                                                                                                                                                                                                                                                                                                                                            | TNF antagonist were investigated for cancer treatment but our data showed TNF downregulation in cancer. TNF-a antagonism rescues the effect of ageing on stroke; TNF-a/TNF-g synergize amplifies senescence-associated inflammation. TNF-deficient mice develop normally but are more susceptible to some infectious agents. | PMID: 34076550, PMID: 35645319 |
| PLAU   | Peptidase              | No  | HC | 90 | 5 | 62.2 | 2  | 8  | 4  | 4  | 4 | 6  | 10 | 9 | 1           | Antagonism                   | Reported: Lifespan extension                                                                                                                                                                          | Pro-Longevity: uPA overexpression (alphaMUPA) increased lifespan by 20% in mice. Transgenic mice overexpressing urokinase-type plasminogen activator increased longevity.                                                                                                                                                                                                    | Agonism       | Yes     | Group 2               | GenAge                                                                                                                                                                                                                                                                                                                                                                                                                                                                                                                                                                                                                                                                                                                                                                                                                                                                                                                                                                                                                                                                                                                                                                                                                                                                                                                                                                                                                                                                                                                                                                                                                                                                                                                                       | Antagonist for cancer.                                                                                                                                                                                                                                                                                                       | PMID: 9060969, PMID: 10638529  |
| ITGAV  | Receptor               | Yes | HC | 91 | 5 | 66.2 | 7  | 21 | 7  | 14 | 5 | 10 | 7  | 3 | Antagonism  | Not reported                 | No evidence                                                                                                                                                                                           | NA                                                                                                                                                                                                                                                                                                                                                                           | Yes           | Group 4 | -                     | Antagonist for cancer. Silencing of ITGAV inhibited cell proliferation, invasion, and self-renewal of breast cancer cell lines. ITG85 served as a ligand for Cyt6, a molecule stimulating the production of IL-6, which is considered an aging biomarker; via itga5/itga85/TNF-a/b signaling pathway in rheumatoid arthritis                                                                                                                                                                                                                                                                                                                                                                                                                                                                                                                                                                                                                                                                                                                                                                                                                                                                                                                                                                                                                                                                                                                                                                                                                                                                                                                                                                                                                 | PMID: 32064162, PMID: 17071038, PMID: 25447695                                                                                                                                                                                                                                                                               |                                |

| Gene   | Enzyme            | Yes | HC    | 92  | 5  | 67.8 | 8  | 27 | 0  | 27 | 1 | 10 | 9  | 1 | Antagonism  | Reported; Reduced lifespan only  | Pro-Longevity: exo-3 (RNAi) decreased lifespan by 20% in <i>C. elegans</i> .                                                                                                                                                                                           | NA         | Yes | Group 3 | GenAge               | Antagonist for cancer. APEX1 is involved in base excision repair during healthy aging                                                                                                                                                                                                                                                                                                                                                                                                                                                            | PMID: 2046071                                      |
|--------|-------------------|-----|-------|-----|----|------|----|----|----|----|---|----|----|---|-------------|----------------------------------|------------------------------------------------------------------------------------------------------------------------------------------------------------------------------------------------------------------------------------------------------------------------|------------|-----|---------|----------------------|--------------------------------------------------------------------------------------------------------------------------------------------------------------------------------------------------------------------------------------------------------------------------------------------------------------------------------------------------------------------------------------------------------------------------------------------------------------------------------------------------------------------------------------------------|----------------------------------------------------|
| APEX1  | Esterase          | Yes | HC    | 92  | 5  | 67.8 | 8  | 27 | 0  | 27 | 1 | 10 | 9  | 1 | Antagonism  | Reported; Reduced lifespan only  | Pro-Longevity: exo-3 (RNAi) decreased lifespan by 20% in <i>C. elegans</i> .                                                                                                                                                                                           | NA         | Yes | Group 3 | GenAge               | Antagonist for cancer. APEX1 is involved in base excision repair during healthy aging                                                                                                                                                                                                                                                                                                                                                                                                                                                            | PMID: 2046071                                      |
| UBE2C  | Acyltransferase   | No  | HC    | 93  | 5  | 70.8 | 1  | 9  | 2  | 7  | 0 | 11 | 11 | 0 | Antagonism  | Not reported                     | No evidence                                                                                                                                                                                                                                                            | NA         | Yes | Group 4 | -                    | Antagonist for cancer. UBE2C is involved in cell cycle checkpoints during healthy aging                                                                                                                                                                                                                                                                                                                                                                                                                                                          |                                                    |
| GSTP1  | Transferase       | Yes | HC    | 94  | 5  | 71.0 | 7  | 22 | 9  | 13 | 1 | 10 | 6  | 4 | Antagonism  | Reported; Lifespan extension     | Pro-Longevity: Overexpression of gst-10 increased lifespan by around 25% in <i>C. elegans</i> . GSTP1 RNAi extended lifespan in <i>C. elegans</i> .                                                                                                                    | Agonism    | Yes | Group 2 | GenAge/Paper         | GSTP1 antagonist such as ezastostat was investigated for cancer treatment. GSTP1 overexpression protects against UV light damage.                                                                                                                                                                                                                                                                                                                                                                                                                | PMID: 30043549<br>PMID: 16164425<br>PMID: 17157356 |
| HMGBl  | Chemokine         | Yes | HC    | 95  | 5  | 71.0 | 7  | 15 | 4  | 11 | 1 | 6  | 4  | 2 | Antagonism  | Not reported                     | No evidence                                                                                                                                                                                                                                                            | NA         | Yes | Group 4 | -                    | Antagonist for cancer: Inhibition of HMGBl reduced proliferation in diffuse large B-cell lymphoma. HMGBl mediates neuroinflammatory priming in the aged brain. Blocking the actions of HMGBl appears to "deaccelerate" aged microglia to an immune challenge, thereby preventing exaggerated behavioral and neuroinflammatory responses following infection.                                                                                                                                                                                     | PMID: 30988279<br>PMID: 27466339                   |
| PTK2   | Tyrosine kinase   | Yes | HC    | 96  | 5  | 76.8 | 9  | 19 | 5  | 14 | 6 | 9  | 9  | 0 | Antagonism  | Not reported                     | No evidence                                                                                                                                                                                                                                                            | NA         | Yes | Group 4 | -                    | Antagonist for cancer. PTK2 is involved in innate immune system during healthy aging.                                                                                                                                                                                                                                                                                                                                                                                                                                                            |                                                    |
| DNMT3B | Methyltransferase | No  | HC    | 97  | 4  | 37.5 | 1  | 6  | 2  | 4  | 1 | 11 | 10 | 1 | Antagonism  | Not reported                     | No evidence                                                                                                                                                                                                                                                            | NA         | No  | Group 4 | -                    | Antagonist for cancer as DNMT3B silencing suppresses migration and invasion by epigenetically promoting miR-14a in bladder cancer. DNMT3B plays a protective role against hepatocarcinogenesis caused by chronic inflammation via maintaining mitochondrial homeostasis.                                                                                                                                                                                                                                                                         | PMID: 33221743<br>PMID: 33275756                   |
| FAS    | Receptor          | No  | HC    | 98  | 4  | 39.3 | 3  | 24 | 23 | 1  | 8 | 10 | 2  | 8 | Antagonism* | Reported; Reduced lifespan only  | Pro-Longevity: Loss of function fas mutated decreased lifespan in mice.                                                                                                                                                                                                | NA         | Yes | Group 3 | -                    | Tumor suppressor gene                                                                                                                                                                                                                                                                                                                                                                                                                                                                                                                            | PMID: 26084385                                     |
| RRM2   | Oxidoreductase    | Yes | HC    | 99  | 4  | 43.8 | 1  | 14 | 2  | 12 | 2 | 11 | 11 | 0 | Antagonism  | Reported; Lifespan extension     | Anti-Longevity: rrm-2 (RNAi) increased lifespan by 14.2% in <i>C. elegans</i> .                                                                                                                                                                                        | Antagonism | Yes | Group 1 | GenAge               | RRM2 is involved in DNA replication during healthy aging                                                                                                                                                                                                                                                                                                                                                                                                                                                                                         | PMID: 23144747                                     |
| PTGS2  | Oxidoreductase    | Yes | HC    | 100 | 4  | 44.3 | 4  | 9  | 8  | 1  | 7 | 9  | 4  | 5 | Antagonism* | Reported; Lifespan extension     | Anti-Longevity: Aspirin inhibiting PTGS1 and PTGS2 extended lifespan in mice.                                                                                                                                                                                          | Antagonism | Yes | Group 1 | JmgAge/Genoprotector | Increased senescence in PTGS2/COX2 transgenic mice. Cyclooxygenase-2 inhibition modulate skin aging in a cytokine activity-independent manner.                                                                                                                                                                                                                                                                                                                                                                                                   | PMID: 27780221<br>PMID: 22771771<br>PMID: 16813121 |
| LYN    | Tyrosine kinase   | Yes | Novel | 1   | 11 | 4.5  | 11 | 9  | 2  | 7  | 2 | 7  | 6  | 1 | Antagonism  | Not reported                     | Not reported                                                                                                                                                                                                                                                           | NA         | Yes | Group 4 | -                    | Lyn suppresses osteoclastogenesis in vitro and in vivo.                                                                                                                                                                                                                                                                                                                                                                                                                                                                                          | PMID: 19171907                                     |
| PIP11  | Esterase          | Yes | Novel | 2   | 11 | 13.5 | 7  | 21 | 1  | 20 | 8 | 10 | 7  | 3 | Antagonism  | Reported; reduced lifespan only  | Pro-Longevity: pip-2 RNAi decreased lifespan in <i>C. elegans</i> .                                                                                                                                                                                                    | NA         | Yes | Group 3 | -                    | Antagonist for cancer. PIP11 is involved in adaptive immune system during healthy aging. In addition, the PIP11 loss-of-function mutation Q510E-Shi2 causes hyperbolic cartilage quality by dysregulating in TOR signaling.                                                                                                                                                                                                                                                                                                                      | PMID: 22061153<br>PMID: 16451100                   |
| POLE   | Transferase       | Yes | Novel | 3   | 11 | 13.9 | 2  | 18 | 3  | 15 | 1 | 10 | 10 | 0 | Antagonism  | Not reported                     | No evidence                                                                                                                                                                                                                                                            | NA         | Yes | Group 4 | -                    | Tumor suppressor gene                                                                                                                                                                                                                                                                                                                                                                                                                                                                                                                            |                                                    |
| PKMYT1 | Protein kinase    | No  | Novel | 4   | 11 | 14.5 | 0  | 16 | 1  | 15 | 0 | 10 | 10 | 0 | Antagonism  | Not reported                     | No evidence                                                                                                                                                                                                                                                            | NA         | No  | -       | -                    | Target did not associate with any aine hallmarks                                                                                                                                                                                                                                                                                                                                                                                                                                                                                                 |                                                    |
| HCK    | Tyrosine kinase   | Yes | Novel | 5   | 11 | 14.9 | 4  | 17 | 5  | 12 | 2 | 11 | 6  | 5 | Antagonism  | Not reported                     | No evidence                                                                                                                                                                                                                                                            | NA         | Yes | Group 4 | -                    | Antagonist for cancer.                                                                                                                                                                                                                                                                                                                                                                                                                                                                                                                           |                                                    |
| POLA1  | Transferase       | Yes | Novel | 6   | 11 | 18.8 | 2  | 23 | 4  | 19 | 0 | 8  | 8  | 0 | Antagonism  | Reported; Reduced lifespan only  | Pro-Longevity: Y47D3A.29 RNAi decreased lifespan by 25.68% in <i>C. elegans</i> .                                                                                                                                                                                      | NA         | Yes | Group 3 | GenAge               | Antagonist for cancer. POLA1 is involved in cell cycle regulation and DNA replication initiation. Antagonist for cancer but HDAC10 was demonstrated to be a tumor suppressor in some types of cancer. Highly tumorigenic and stem-like lung adenocarcinoma cells were increased in Hdac10-deficient tumors compared with Hdac10 wild-type tumors. HDAC10 expression is associated with DNA mismatch repair gene and is a predictor of good prognosis in colon carcinoma. Reduced expression of HDAC10 contributes to tumor progression in NSCLC. | PMID: 18059442<br>PMID: 23144747<br>PMID: 20985502 |
| HDAC10 | Hydrolase         | Yes | Novel | 7   | 11 | 19.7 | 5  | 15 | 14 | 1  | 0 | 5  | 4  | 1 | Antagonism  | Not reported                     | No evidence                                                                                                                                                                                                                                                            | NA         | Yes | Group 4 | -                    | Antagonist for cancer. HDAC10 is involved in cell cycle checkpoint.                                                                                                                                                                                                                                                                                                                                                                                                                                                                              |                                                    |
| IMPDH2 | Oxidoreductase    | Yes | Novel | 8   | 11 | 23.2 | 0  | 5  | 1  | 4  | 0 | 10 | 5  | 5 | Antagonism  | Reported; No effects on lifespan | Anti-Longevity: Mycophenolate acid inhibiting IMPDH1 and IMPDH2 increased lifespan by 6.08% in <i>Drosophila</i> without significance. Mycophenolate acid inhibiting IMPDH1 and IMPDH2 slightly increased lifespan by 6.08% in <i>C. elegans</i> without significance. | NA         | No  | -       | -                    | Target did not associate with any aging hallmarks < 7 tissues out of 47 dysregulated during aging                                                                                                                                                                                                                                                                                                                                                                                                                                                | PMID: 33008901                                     |
| PSMD14 | Peptidase         | Yes | Novel | 9   | 11 | 23.9 | 3  | 21 | 1  | 20 | 1 | 11 | 10 | 1 | Antagonism  | Reported; Reduced lifespan only  | Pro-Longevity: post-developmental RNAi of rps1 decreased lifespan by 19.3%. rps-11 RNAi decreased lifespan by 34.3% in <i>C. elegans</i> .                                                                                                                             | NA         | Yes | Group 3 | GenAge, SynergyAge   | Antagonist for cancer. PSMD14 is involved in cell cycle checkpoint.                                                                                                                                                                                                                                                                                                                                                                                                                                                                              | PMID: 23144747<br>PMID: 1792428                    |
| FES    | Tyrosine kinase   | No  | Novel | 10  | 11 | 28.4 | 1  | 16 | 13 | 3  | 7 | 10 | 3  | 7 | Antagonism* | Not reported                     | No evidence                                                                                                                                                                                                                                                            | NA         | Yes | Group 4 | -                    | Overexpression of FES could inhibit cell proliferation, migration, and invasion of osteosarcoma cells. However, FES is considered as proto-oncogene, tyrosine kinase, and our data showed FES downregulation in 3 cancers. Taken together, its expression dysregulation is inconsistent with its mechanism of action in cancer. FES kinase activity is also dispensable for hematopoiesis.                                                                                                                                                       | PMID: 25250211<br>PMID: 1622632                    |
| PSMB5  | Peptidase         | Yes | Novel | 11  | 11 | 32.4 | 2  | 27 | 0  | 27 | 1 | 8  | 8  | 0 | Antagonism  | Reported; Lifespan extension     | Pro-Longevity: pbs-5 overexpression increase 25% lifespan in <i>C. elegans</i> . pbs-5 RNAi decreased lifespan by 29.95% in <i>C. elegans</i> .                                                                                                                        | Agonism    | Yes | Group 2 | GenAge               | Antagonist for cancer. PSMB5 is involved in cell cycle checkpoint during healthy aging.                                                                                                                                                                                                                                                                                                                                                                                                                                                          | PMID: 25394511<br>PMID: 1792428                    |
| SMO    | GPCR              | Yes | Novel | 12  | 11 | 43.5 | 3  | 17 | 12 | 5  | 2 | 7  | 3  | 4 | Antagonism  | Not reported                     | No evidence                                                                                                                                                                                                                                                            | NA         | Yes | Group 4 | -                    | Antagonist for cancer but SMO inhibition promotes aging. SMO has shown to be critical for the hedgehog signal transduction on the cell membrane. Hedgehog signaling is dysregulated in old hepatocytes, and this accelerates aging. Deleting SMO in young hepatocytes before partial hepatectomy prevented hedgehog pathway activation after partial hepatectomy and inhibited regeneration. In addition, hedgehog inhibition promoted telomere shortening and mitochondrial dysfunction in hepatocytes.                                         | PMID: 34984806                                     |
| MCMB   | Hydrolase         | No  | Novel | 13  | 10 | 23.8 | 3  | 11 | 4  | 7  | 0 | 10 | 10 | 0 | Antagonism  | Not reported                     | No evidence                                                                                                                                                                                                                                                            | NA         | Yes | Group 4 | -                    | Antagonist for cancer. MCMB is involved in cell cycle checkpoint during healthy aging.                                                                                                                                                                                                                                                                                                                                                                                                                                                           |                                                    |

|          |                      |     |       |    |    |      |   |                                                                                                                                                   |    |    |    |   |    |    |   |             |                                  |                                                                                                                                                                                                                                                            |         |     |         |                     |                                                                                                                                                                                                                                                                                                                                                                                                                                                                                                                                                                                                                                                                                                                                                                                                                           |                                                                                                                                                                          |                                                |
|----------|----------------------|-----|-------|----|----|------|---|---------------------------------------------------------------------------------------------------------------------------------------------------|----|----|----|---|----|----|---|-------------|----------------------------------|------------------------------------------------------------------------------------------------------------------------------------------------------------------------------------------------------------------------------------------------------------|---------|-----|---------|---------------------|---------------------------------------------------------------------------------------------------------------------------------------------------------------------------------------------------------------------------------------------------------------------------------------------------------------------------------------------------------------------------------------------------------------------------------------------------------------------------------------------------------------------------------------------------------------------------------------------------------------------------------------------------------------------------------------------------------------------------------------------------------------------------------------------------------------------------|--------------------------------------------------------------------------------------------------------------------------------------------------------------------------|------------------------------------------------|
| PSMB2    | Peptidase            | Yes | Novel | 14 | 10 | 23.9 | 1 | Impaired proteostasis                                                                                                                             | 26 | 0  | 26 | 1 | 10 | 10 | 0 | Antagonism  | Reported; Reduced lifespan only  | Pro-Longevity: phs-4 RNAi decreased lifespan by 30.92% in <i>C. elegans</i> .                                                                                                                                                                              | NA      | Yes | Group 3 | Synergy/Age         | Antagonist for cancer.                                                                                                                                                                                                                                                                                                                                                                                                                                                                                                                                                                                                                                                                                                                                                                                                    | PSMB2 is involved in cell cycle checkpoint during healthy aging.                                                                                                         | PMID: 17392428                                 |
| PRIM1    | Transferase          | Yes | Novel | 15 | 10 | 27.0 | 1 | Genomic instability, Cellular senescence, Deregulated nutrient signaling, Extracellular matrix stiffness, Inflammation, Mitochondrial dysfunction | 21 | 2  | 19 | 0 | 9  | 9  | 0 | Antagonism  | Not reported                     | No evidence                                                                                                                                                                                                                                                | NA      | Yes | Group 4 | -                   | -                                                                                                                                                                                                                                                                                                                                                                                                                                                                                                                                                                                                                                                                                                                                                                                                                         | -                                                                                                                                                                        | -                                              |
| FGR      | Tyrosine kinase      | Yes | Novel | 16 | 10 | 31.7 | 5 | -                                                                                                                                                 | 18 | 10 | 8  | 2 | 7  | 3  | 4 | Antagonism* | Not reported                     | No evidence                                                                                                                                                                                                                                                | NA      | Yes | Group 4 | -                   | FGR inhibitor, such as dasatinib was investigated for cancer, although our data showed FGR downregulation in cancers. Dasatinib and quercetin restore e-Rb1 in mice and humans, which may amplify protection against aging and age-related disease.                                                                                                                                                                                                                                                                                                                                                                                                                                                                                                                                                                       | PMID: 3529270                                                                                                                                                            |                                                |
| TOP2B    | Isomerase            | Yes | Novel | 17 | 10 | 34.7 | 1 | Epigenetic shift                                                                                                                                  | 24 | 0  | 24 | 0 | 5  | 4  | 1 | Antagonism* | Not reported                     | No evidence                                                                                                                                                                                                                                                | NA      | Yes | Group 4 | -                   | TOP2B inhibitor such as Etoposide approved for cancer, although our data showed TOP2B downregulation in cancer. TOP2B is key decatenating enzyme that alters DNA topology by binding to two double-stranded DNA molecules.                                                                                                                                                                                                                                                                                                                                                                                                                                                                                                                                                                                                | -                                                                                                                                                                        |                                                |
| PSMA4    | Peptidase            | Yes | Novel | 18 | 10 | 38.7 | 1 | Impaired proteostasis                                                                                                                             | 22 | 1  | 21 | 1 | 10 | 10 | 0 | Antagonism  | Not reported                     | No evidence                                                                                                                                                                                                                                                | NA      | Yes | Group 4 | -                   | PSMA4 is involved in cell cycle checkpoint during healthy aging. Target did not associate with any aging hallmarks                                                                                                                                                                                                                                                                                                                                                                                                                                                                                                                                                                                                                                                                                                        | -                                                                                                                                                                        |                                                |
| GNB1     | Hydrolase            | No  | Novel | 19 | 10 | 39.3 | 0 | -                                                                                                                                                 | 28 | 2  | 26 | 6 | 9  | 7  | 2 | Antagonism  | Not reported                     | No evidence                                                                                                                                                                                                                                                | NA      | No  | -       | -                   | -                                                                                                                                                                                                                                                                                                                                                                                                                                                                                                                                                                                                                                                                                                                                                                                                                         | -                                                                                                                                                                        |                                                |
| PSMA3    | Peptidase            | Yes | Novel | 20 | 10 | 39.7 | 1 | Impaired proteostasis                                                                                                                             | 19 | 0  | 19 | 1 | 9  | 9  | 0 | Antagonism  | Reported; No effects on lifespan | paas-7 RNAi slightly increased lifespan by 1.93% without significance in <i>C. elegans</i> .                                                                                                                                                               | NA      | Yes | Group 4 | Synergy/Age         | Antagonist for cancer.                                                                                                                                                                                                                                                                                                                                                                                                                                                                                                                                                                                                                                                                                                                                                                                                    | PSMA3 is involved in cell cycle checkpoint during healthy aging.                                                                                                         | PMID: 17392428                                 |
| KDM2A    | Oxidoreductase       | No  | Novel | 21 | 10 | 45.9 | 3 | Cellular senescence, Epigenetic shift, Genomic instability                                                                                        | 12 | 1  | 11 | 0 | 8  | 7  | 1 | Antagonism  | Not reported                     | No evidence                                                                                                                                                                                                                                                | NA      | Yes | Group 4 | -                   | Antagonist for cancer.                                                                                                                                                                                                                                                                                                                                                                                                                                                                                                                                                                                                                                                                                                                                                                                                    | KDM2A promotes stemness and angiogenesis of breast cancer. KDM2A deficiency in macrophages enhances thermogenesis to protect mice against HFHD-induced obesity.          | PMID: 2702061, PMID: 33402408                  |
| UBE2T    | Acyltransferase      | No  | Novel | 22 | 9  | 21.7 | 2 | Cellular senescence, Impaired proteostasis                                                                                                        | 20 | 2  | 18 | 0 | 11 | 11 | 0 | Antagonism  | Not reported                     | No evidence                                                                                                                                                                                                                                                | NA      | Yes | Group 4 | -                   | Antagonist for cancer.                                                                                                                                                                                                                                                                                                                                                                                                                                                                                                                                                                                                                                                                                                                                                                                                    | UBE2T is involved in DNA repair (fission anemia pathway) during healthy aging.                                                                                           | -                                              |
| ITGB5    | Receptor             | Yes | Novel | 23 | 9  | 24.2 | 2 | Akred intercellular communications, Extracellular matrix stiffness                                                                                | 17 | 7  | 10 | 5 | 7  | 6  | 1 | Antagonism  | Reported; Reduced lifespan only  | Pro-Longevity: Post-developmental RNAi of pair-3 shortens lifespan of wild type <i>C. elegans</i> .                                                                                                                                                        | NA      | Yes | Group 3 | Gen/Age             | ITGB5 is a TGF- $\beta$ activator. TGF- $\beta$ signaling was shown to repress body size as well as lifespan <i>in vivo</i> . ITGB5 served as a ligand for Cyt6, a molecule stimulating the production of IL-6, which is considered as aging biomarker, via its ligand/SLK/NF- $\kappa$ B signaling pathway in rheumatoid arthritis.                                                                                                                                                                                                                                                                                                                                                                                                                                                                                      | PMID: 29076608, PMID: 17071038, PMID: 25479695, PMID: 3143747                                                                                                            |                                                |
| WWP1     | Acyltransferase      | No  | Novel | 24 | 9  | 34.7 | 1 | Impaired proteostasis                                                                                                                             | 25 | 6  | 19 | 0 | 8  | 7  | 1 | Antagonism  | Reported; Lifespan extension     | Pro-Longevity: wwp-1 overexpression increased lifespan by 20% in <i>C. elegans</i> . wwp-1 RNAi decreased lifespan by 9% in <i>C. elegans</i> . WWP1 homolog in <i>C. elegans</i> was found to increase life expectancy in response to dietary restriction | Agonism | Yes | Group 2 | Gen/Age/Synergy/Age | PTEN tumor suppressor for cancer treatment can be reactivated through inhibition of a MYC-WWP1 inhibitory pathway, unmasking tumor suppressive activity. WWP1 negatively regulates osteoblast function by inhibiting osteoblast differentiation and migration. WWP1 contributes to shift in matrix proteolytic profiles and a myocardial aging phenotype with diastolic heart. Inducing WWP1 expression caused LVH and preserved systolic function but impaired diastolic dysfunction, consistent with the absence of heart failure with a preserved ejection fraction.                                                                                                                                                                                                                                                   | PMID: 19555937, PMID: 3006689, PMID: 3282210, PMID: 31097036, PMID: 2555732                                                                                              |                                                |
| ITGA9    | Receptor             | No  | Novel | 25 | 9  | 46.7 | 2 | Extracellular matrix stiffness                                                                                                                    | 24 | 3  | 21 | 4 | 8  | 2  | 6 | Agonism     | Not reported                     | No evidence                                                                                                                                                                                                                                                | NA      | Yes | Group 4 | -                   | ITGA9 suppressed hepatocellular carcinoma metastasis.                                                                                                                                                                                                                                                                                                                                                                                                                                                                                                                                                                                                                                                                                                                                                                     | PMID: 29951557                                                                                                                                                           |                                                |
| PPP5C    | Esterase             | No  | Novel | 26 | 9  | 48.2 | 5 | Cellular senescence, Epigenetic shift, Genomic instability, Impaired proteostasis, Inflammation                                                   | 22 | 1  | 21 | 2 | 7  | 7  | 0 | Antagonism  | Not reported                     | No evidence                                                                                                                                                                                                                                                | NA      | Yes | Group 4 | -                   | Antagonist for cancer.                                                                                                                                                                                                                                                                                                                                                                                                                                                                                                                                                                                                                                                                                                                                                                                                    | PPP5C is involved in DNA double-strand break repair during healthy aging.                                                                                                | -                                              |
| ANAPC2   | Acyltransferase      | No  | Novel | 27 | 9  | 54.6 | 1 | Impaired proteostasis                                                                                                                             | 12 | 1  | 11 | 0 | 8  | 5  | 3 | Antagonism  | Not reported                     | No evidence                                                                                                                                                                                                                                                | NA      | Yes | Group 4 | -                   | Antagonist for cancer.                                                                                                                                                                                                                                                                                                                                                                                                                                                                                                                                                                                                                                                                                                                                                                                                    | ANAPC2 is involved in cell cycle checkpoint during healthy aging. The anaphase promoting complex is required for memory function in mice.                                | PMID: 21191042                                 |
| MSTIR    | Receptor kinase      | Yes | Novel | 28 | 9  | 59.2 | 2 | Inflammation, Telomere attrition                                                                                                                  | 9  | 4  | 5  | 0 | 10 | 6  | 4 | Antagonism  | Not reported                     | No evidence                                                                                                                                                                                                                                                | NA      | Yes | Group 4 | -                   | MSTIR kinase accelerates pancreatic cancer progression via effects on both epithelial cells and macrophages. MSTIR inhibits necrosis-like osteolysis. KAT5A belongs to histone acetyltransferase (HAT). Stability of HATs and histone deacetylases activities is necessary to maintain normal cellular functions or otherwise leads to aging. KAT5A was found to regulate Nr2f1/ARE signaling pathway and inhibit ROS accumulation in bone marrow-derived mesenchymal stem cells from the old, thus promoting proliferation, colony formation, and osteogenic differentiation of OBMSCs. KAT5A could promote osteogenesis of OBMSCs. However, for cancer, KAT5A inhibitor WM-1119 repressed the cell proliferation of sorafenib-resistant HCC cells, while overexpression of KAT5A could reverse the effect in the cells. | PMID: 3096326, PMID: 28248933                                                                                                                                            |                                                |
| KAT5A    | Acyltransferase      | No  | Novel | 29 | 9  | 59.9 | 3 | Cellular senescence, Epigenetic shift, Genomic instability                                                                                        | 13 | 4  | 9  | 0 | 6  | 4  | 2 | Antagonism  | Not reported                     | No evidence                                                                                                                                                                                                                                                | NA      | Yes | Group 4 | -                   | Antagonist for cancer.                                                                                                                                                                                                                                                                                                                                                                                                                                                                                                                                                                                                                                                                                                                                                                                                    | UBE2M is involved in adaptive immune system during healthy aging.                                                                                                        | PMID: 19818845, PMID: 33541408, PMID: 34808502 |
| UBE2M    | Acyltransferase      | No  | Novel | 30 | 9  | 60.1 | 2 | Genomic instability, Impaired proteostasis                                                                                                        | 13 | 3  | 10 | 0 | 9  | 8  | 1 | Antagonism  | Not reported                     | No evidence                                                                                                                                                                                                                                                | NA      | Yes | Group 4 | -                   | Antagonist for cancer.                                                                                                                                                                                                                                                                                                                                                                                                                                                                                                                                                                                                                                                                                                                                                                                                    | MAPKAPK5 is also considered as tumor suppressor serine/threonine-protein kinase involved in mTORC1 signaling.                                                            | -                                              |
| MAPKAPK5 | Protein kinase       | Yes | Novel | 31 | 8  | 35.0 | 4 | Cellular senescence, Genomic instability, Stem cell exhaustion, Telomere attrition                                                                | 22 | 1  | 21 | 2 | 11 | 11 | 0 | Antagonism  | Not reported                     | No evidence                                                                                                                                                                                                                                                | NA      | Yes | Group 4 | -                   | Our data showed ADRA2C downregulation in multiple cancers. Decembolesamide, Clomidine, and Bromindane, being ADRA2C agonists, were used for cancer in clinical trials. Guanfacine hydrochloride agonizing ADRA2A, ADRA2B, and ADRA2C extended lifespan in <i>C. elegans</i> .                                                                                                                                                                                                                                                                                                                                                                                                                                                                                                                                             | PMID: 2624241, PMID: 30203375, PMID: 24134630                                                                                                                            |                                                |
| ADRA2C   | GPCR                 | Yes | Novel | 32 | 8  | 43.6 | 1 | Akred intercellular communications                                                                                                                | 11 | 3  | 8  | 0 | 9  | 3  | 6 | Agonism     | Not reported                     | No evidence                                                                                                                                                                                                                                                | NA      | Yes | Group 4 | -                   | ITK downregulation in cancers. ITK is important for adaptive immune system during healthy aging. h429a, GcP null mutations decreased lifespan in <i>Drosophila</i> . Bk29A is the sole Tex family member in <i>Drosophila</i> , including it.                                                                                                                                                                                                                                                                                                                                                                                                                                                                                                                                                                             | PMID: 23672610, PMID: 16023106                                                                                                                                           |                                                |
| ITK      | Tyrosine kinase      | Yes | Novel | 33 | 8  | 45.1 | 2 | Akred intercellular communications, Cellular senescence, Inflammation                                                                             | 15 | 13 | 2  | 2 | 6  | 3  | 3 | Antagonism  | Not reported                     | No evidence                                                                                                                                                                                                                                                | NA      | Yes | Group 4 | -                   | Antagonist for cancer. Knockdown RBCK1 reduced tumorigenicity in renal cancer <i>in vivo</i> .                                                                                                                                                                                                                                                                                                                                                                                                                                                                                                                                                                                                                                                                                                                            | -                                                                                                                                                                        |                                                |
| BLK      | Tyrosine kinase      | Yes | Novel | 34 | 8  | 48.0 | 6 | Cellular senescence, Deregulated nutrient signaling, Epigenetic shift, Genomic instability, Inflammation                                          | 9  | 4  | 5  | 0 | 9  | 4  | 5 | Antagonism* | Not reported                     | No evidence                                                                                                                                                                                                                                                | NA      | Yes | Group 4 | -                   | Antagonist for cancer. Knockdown RBCK1 reduced tumorigenicity in renal cancer <i>in vivo</i> .                                                                                                                                                                                                                                                                                                                                                                                                                                                                                                                                                                                                                                                                                                                            | PMID: 30874541, PMID: 35174471                                                                                                                                           |                                                |
| RBCK1    | Acyltransferase      | No  | Novel | 35 | 8  | 48.9 | 4 | Epigenetic shift, Genomic instability, Impaired proteostasis, Inflammation                                                                        | 17 | 11 | 6  | 0 | 10 | 10 | 0 | Antagonism  | Not reported                     | No evidence                                                                                                                                                                                                                                                | NA      | Yes | Group 4 | -                   | Antagonist for cancer. RBCK1 interacts with PTEN (tumor suppressor gene) and promotes PTEN degradation in K48-linked ubiquitination. Target did not associate with any aging hallmarks.                                                                                                                                                                                                                                                                                                                                                                                                                                                                                                                                                                                                                                   | -                                                                                                                                                                        |                                                |
| PFKP     | Unclassified kinase  | No  | Novel | 36 | 8  | 50.5 | 0 | -                                                                                                                                                 | 17 | 4  | 13 | 2 | 9  | 8  | 1 | Antagonism  | Not reported                     | No evidence                                                                                                                                                                                                                                                | NA      | No  | -       | -                   | -                                                                                                                                                                                                                                                                                                                                                                                                                                                                                                                                                                                                                                                                                                                                                                                                                         | -                                                                                                                                                                        |                                                |
| RPS6A4   | AGC kinase           | No  | Novel | 37 | 8  | 56.9 | 4 | Epigenetic shift, Genomic instability, Impaired proteostasis, Inflammation                                                                        | 18 | 0  | 18 | 4 | 10 | 9  | 1 | Antagonism  | Not reported                     | No evidence                                                                                                                                                                                                                                                | NA      | Yes | Group 4 | -                   | Antagonist for cancer. RPS6A4 is a potentially valuable molecule for understanding HCC management. Increased RPS6A4 might be a promising prognostic factor for low survival of hepatocellular carcinoma. Depletion of S6A1 resembles gene expression patterns of caloric restriction or prolongs lifespan by pharmacological activation of AMPK in mice.                                                                                                                                                                                                                                                                                                                                                                                                                                                                  | PMID: 25252347, PMID: 33797661                                                                                                                                           |                                                |
| ATAI2    | Hydrolase            | No  | Novel | 38 | 8  | 63.5 | 0 | -                                                                                                                                                 | 16 | 2  | 14 | 0 | 11 | 11 | 0 | Antagonism  | Not reported                     | No evidence                                                                                                                                                                                                                                                | NA      | No  | -       | -                   | Target did not associate with any aging hallmarks                                                                                                                                                                                                                                                                                                                                                                                                                                                                                                                                                                                                                                                                                                                                                                         | -                                                                                                                                                                        |                                                |
| PSMB3    | Peptidase            | Yes | Novel | 39 | 7  | 23.4 | 1 | Impaired proteostasis                                                                                                                             | 19 | 1  | 18 | 1 | 10 | 9  | 1 | Antagonism  | Reported; Reduced lifespan only  | Pro-Longevity: phs-3 RNAi decreased lifespan by 31.88% in <i>C. elegans</i> .                                                                                                                                                                              | NA      | Yes | Group 3 | Synergy/Age         | Antagonist for cancer.                                                                                                                                                                                                                                                                                                                                                                                                                                                                                                                                                                                                                                                                                                                                                                                                    | PSMB3 is involved in cell cycle checkpoint during healthy aging.                                                                                                         | PMID: 17392428                                 |
| PSMB6    | Peptidase            | Yes | Novel | 40 | 7  | 33.4 | 1 | Impaired proteostasis                                                                                                                             | 21 | 0  | 21 | 1 | 8  | 4  | 4 | Antagonism  | Not reported                     | No evidence                                                                                                                                                                                                                                                | NA      | Yes | Group 4 | -                   | Antagonist for cancer.                                                                                                                                                                                                                                                                                                                                                                                                                                                                                                                                                                                                                                                                                                                                                                                                    | PSMB6 is involved in cell cycle checkpoint during healthy aging. Our data showed PTPRF upregulation in multiple cancers, suggesting antagonist for cancer treatment, but | -                                              |
| PTPRF    | Receptor phosphatase | No  | Novel | 41 | 7  | 33.4 | 1 | Stem cell exhaustion                                                                                                                              | 26 | 4  | 22 | 3 | 9  | 8  | 1 | Antagonism  | Not reported                     | No evidence                                                                                                                                                                                                                                                | NA      | Yes | Group 4 | -                   | PTPRF as a novel tumor suppressor through deactivation of ERK1/2 signaling in gastric adenocarcinoma, and PPAR $\gamma$ inhibits breast cancer progression by upregulating PTPRF expression                                                                                                                                                                                                                                                                                                                                                                                                                                                                                                                                                                                                                               | PMID: 30464527, PMID: 31799666                                                                                                                                           |                                                |
| PSMC3    | Hydrolase            | Yes | Novel | 42 | 7  | 34.1 | 1 | Impaired proteostasis                                                                                                                             | 19 | 1  | 18 | 1 | 9  | 9  | 0 | Antagonism  | Reported; Reduced lifespan only  | Pro-Longevity: rps-5 RNAi decreased lifespan by 38.65% in <i>C. elegans</i> .                                                                                                                                                                              | NA      | Yes | Group 3 | Synergy/Age         | Antagonist for cancer.                                                                                                                                                                                                                                                                                                                                                                                                                                                                                                                                                                                                                                                                                                                                                                                                    | PSMC3 is involved for cell cycle checkpoint during healthy aging.                                                                                                        | PMID: 17392428                                 |



|         |                      |     |       |    |   |      |   |                                                                                                         |    |   |    |    |    |    |            |                              |                                                                                                                                      |                                                                                                                                                                                                                                                                                                                                                                                                                                                                                                                                                                           |            |         |         |                                                                                                |                                                                                                                                                                                                                                                                                                                                                            |                                                |
|---------|----------------------|-----|-------|----|---|------|---|---------------------------------------------------------------------------------------------------------|----|---|----|----|----|----|------------|------------------------------|--------------------------------------------------------------------------------------------------------------------------------------|---------------------------------------------------------------------------------------------------------------------------------------------------------------------------------------------------------------------------------------------------------------------------------------------------------------------------------------------------------------------------------------------------------------------------------------------------------------------------------------------------------------------------------------------------------------------------|------------|---------|---------|------------------------------------------------------------------------------------------------|------------------------------------------------------------------------------------------------------------------------------------------------------------------------------------------------------------------------------------------------------------------------------------------------------------------------------------------------------------|------------------------------------------------|
| PRPF19  | Acyltransferase      | No  | Novel | 43 | 7 | 35.9 | 3 | Cellular senescence, Genomic instability, Impaired proteostasis                                         | 27 | 1 | 26 | 10 | 9  | 1  | Antagonism | Reported; Lifespan extension | Ubiquitous overexpression of dPrp19 increased lifespan of female <i>D.rosophilus</i> while no consistent lifespan extension in male. | Agonism                                                                                                                                                                                                                                                                                                                                                                                                                                                                                                                                                                   | Yes        | Group 2 | GenAge  | Antagonist for cancer: PRPF19 is involved for nucleotide excision repair during healthy aging. | PMID: 28649423                                                                                                                                                                                                                                                                                                                                             |                                                |
| RPS6KA2 | AGC kinase           | Yes | Novel | 44 | 7 | 37.7 | 3 | Altered intercellular communications, Genomic instability, Impaired proteostasis                        | 20 | 1 | 19 | 2  | 10 | 2  | 8          | Antagonism*                  | Not reported                                                                                                                         | No evidence                                                                                                                                                                                                                                                                                                                                                                                                                                                                                                                                                               | NA         | Yes     | Group 4 | -                                                                                              | Agonist for cancer: Re-expression of RPS6KA2 in ovarian cancer cell lines suppressed colony formation. In UCL101 cells, RPS6KA2 decreased proliferation, caused G1 arrest, and enhanced apoptosis. However, genetic as well as pharmacological inhibition of RPS6KA2 by the inhibitor BI-41870 acted synergistically with etirinib on tumor cell survival. | PMID: 2702868, PMID: 16871154, PMID: 2440387   |
| PSMC4   | Hydrolase            | Yes | Novel | 45 | 7 | 43.4 | 1 | Impaired proteostasis                                                                                   | 18 | 0 | 18 | 1  | 10 | 10 | 0          | Antagonism                   | Not reported                                                                                                                         | No evidence                                                                                                                                                                                                                                                                                                                                                                                                                                                                                                                                                               | NA         | Yes     | Group 4 | -                                                                                              | Antagonist for cancer: PSMC4 is involved in cell cycle checkpoint during healthy aging.                                                                                                                                                                                                                                                                    |                                                |
| PSMC2   | Hydrolase            | Yes | Novel | 46 | 7 | 44.7 | 1 | Impaired proteostasis                                                                                   | 21 | 1 | 20 | 1  | 8  | 8  | 0          | Antagonism                   | Reported; Reduced lifespan only                                                                                                      | Pro-Longevity: rps-1 RNAi decreased lifespan by 36.2% in <i>C. elegans</i> .<br>No evidence                                                                                                                                                                                                                                                                                                                                                                                                                                                                               | NA         | Yes     | Group 3 | GenAge/SynergyAge                                                                              | Antagonist for cancer: PSMC2 is involved in cell cycle checkpoint during healthy aging.                                                                                                                                                                                                                                                                    | PMID: 17392428                                 |
| GANAB   | Glycosylase          | No  | Novel | 47 | 7 | 46.7 | 0 | -                                                                                                       | 31 | 1 | 30 | 0  | 9  | 9  | 0          | Antagonism                   | Not reported                                                                                                                         | No evidence                                                                                                                                                                                                                                                                                                                                                                                                                                                                                                                                                               | NA         | No      | -       | -                                                                                              | Target did not associate with any ageing hallmarks                                                                                                                                                                                                                                                                                                         |                                                |
| MAPKAPK | Protein kinase       | No  | Novel | 48 | 7 | 46.9 | 1 | Inflammation                                                                                            | 26 | 4 | 22 | 4  | 9  | 6  | 3          | Antagonism                   | Not reported                                                                                                                         | No evidence                                                                                                                                                                                                                                                                                                                                                                                                                                                                                                                                                               | NA         | Yes     | Group 4 | -                                                                                              | Antagonist for cancer: JNK1/2/3 are the upstream of MK3. While the role of MAPKAPK3/MK3 in aging is unknown, overexpression of MAPK3/JNK in roundworms also increases lifespan.                                                                                                                                                                            |                                                |
| IMPDH1  | Oxidoreductase       | Yes | Novel | 49 | 7 | 47.4 | 0 | -                                                                                                       | 15 | 3 | 12 | 0  | 10 | 9  | 1          | Antagonism                   | Reported; No effects on lifespan                                                                                                     | Anti-Longevity: Mycophenolic acid inhibiting IMPDH1 and IMPDH2 increased lifespan by 6.08% in <i>Drosophila</i> without significance. Mycophenolic acid inhibiting IMPDH1 and IMPDH2 slightly increased lifespan by 6.08% in <i>C. elegans</i> without significance.                                                                                                                                                                                                                                                                                                      | Antagonism | No      | -       | DrugAge                                                                                        | Target did not associate with any ageing hallmarks                                                                                                                                                                                                                                                                                                         | PMID: 3300891                                  |
| PPP4C   | Esterase             | No  | Novel | 50 | 7 | 48.7 | 4 | Cellular senescence, Epigenetic shift, Genomic instability, Inflammation                                | 25 | 4 | 21 | 1  | 9  | 9  | 0          | Antagonism                   | Reported; reduced lifespan only                                                                                                      | Pro-Longevity: RNAi PPP4C decreased lifespan in <i>Drosophila</i> .<br>No evidence                                                                                                                                                                                                                                                                                                                                                                                                                                                                                        | NA         | Yes     | Group 3 | -                                                                                              | Antagonist for cancer: PPP4C is involved in DNA double-strand break repair during healthy aging.                                                                                                                                                                                                                                                           | PMID: 34452932                                 |
| RHOH    | Hydrolase            | No  | Novel | 51 | 7 | 50.4 | 3 | Epigenetic shift, Genomic instability, Inflammation                                                     | 10 | 6 | 4  | 5  | 7  | 5  | 2          | Antagonism                   | Not reported                                                                                                                         | Not reported                                                                                                                                                                                                                                                                                                                                                                                                                                                                                                                                                              | NA         | Yes     | Group 4 | -                                                                                              | Tumor suppressor gene                                                                                                                                                                                                                                                                                                                                      |                                                |
| PPP1CB  | Esterase             | No  | Novel | 52 | 7 | 53.9 | 0 | -                                                                                                       | 15 | 5 | 10 | 4  | 7  | 2  | 5          | Antagonism*                  | Not reported                                                                                                                         | No evidence                                                                                                                                                                                                                                                                                                                                                                                                                                                                                                                                                               | NA         | No      | -       | -                                                                                              | Target did not associate with any ageing hallmarks                                                                                                                                                                                                                                                                                                         |                                                |
| ADGRE5  | GPCR                 | No  | Novel | 53 | 7 | 55.6 | 2 | Altered intercellular communications, Inflammation                                                      | 10 | 1 | 9  | 0  | 8  | 4  | 4          | Antagonism                   | Not reported                                                                                                                         | No evidence                                                                                                                                                                                                                                                                                                                                                                                                                                                                                                                                                               | NA         | Yes     | Group 4 | -                                                                                              | Antagonist for cancer: ADGRE5 is involved in innate immune system during healthy aging.                                                                                                                                                                                                                                                                    |                                                |
| PSMA5   | Peptidase            | Yes | Novel | 54 | 7 | 57.0 | 1 | Impaired proteostasis                                                                                   | 26 | 0 | 26 | 1  | 9  | 8  | 1          | Antagonism                   | Reported; Reduced lifespan only                                                                                                      | Pro-Longevity: pa-5 RNAi decreased lifespan by 34.78% in <i>C. elegans</i> .<br>No evidence                                                                                                                                                                                                                                                                                                                                                                                                                                                                               | NA         | Yes     | Group 3 | -                                                                                              | Antagonist for cancer: PSMA5 is involved in cell cycle checkpoint during healthy aging.                                                                                                                                                                                                                                                                    | PMID: 17392428                                 |
| PIPK1C  | Non-protein kinase   | No  | Novel | 55 | 7 | 57.6 | 3 | Altered intercellular communications, Cellular senescence, Dysregulated nutrient signaling              | 17 | 2 | 15 | 2  | 8  | 3  | 5          | Antagonism*                  | Not reported                                                                                                                         | No evidence                                                                                                                                                                                                                                                                                                                                                                                                                                                                                                                                                               | NA         | Yes     | Group 4 | -                                                                                              | Adipocyte-specific deletion of PIPK1c reduces diet-induced obesity and insulin resistance by increasing energy expenditure. Loss of PIPK1c in mesenchymal stem cells leads to osteopenia by impairing bone remodeling.                                                                                                                                     | PMID: 3499482, PMID: 3500892                   |
| ITGB6   | Receptor             | Yes | Novel | 56 | 7 | 61.7 | 4 | Altered intercellular communications, Extracellular matrix stiffness, Genomic instability, Inflammation | 11 | 3 | 8  | 3  | 6  | 4  | 2          | Antagonism                   | Reported; reduced lifespan only                                                                                                      | Pro-Longevity: Post-developmental RNAi of pat-3 shortens lifespan of wild type <i>C. elegans</i> .<br>No evidence                                                                                                                                                                                                                                                                                                                                                                                                                                                         | NA         | Yes     | Group 3 | GenAge                                                                                         | Antagonist for cancer: Our data show ITGB6 upregulation in cancer. ITGB6 is a TGF- $\beta$ activator. TGF- $\beta$ signaling was shown to repress body size as well as lifespan <i>in vivo</i> .                                                                                                                                                           | PMID: 2970408, PMID: 23144747                  |
| SIPR1   | GPCR                 | Yes | Novel | 57 | 7 | 62.0 | 0 | -                                                                                                       | 9  | 6 | 3  | 3  | 8  | 0  | 8          | Antagonism*                  | Not reported                                                                                                                         | No evidence                                                                                                                                                                                                                                                                                                                                                                                                                                                                                                                                                               | NA         | No      | -       | -                                                                                              | SIPR1 is highly expressed in several tumor types (based on literature). Targeting SIPR1 activity in endothelial cells (ECs) in the setting of anti-VEGFR2 therapy is a potentially attractive strategy to treat VEGFR2 refractory tumors.                                                                                                                  |                                                |
| ERK     | Tyrosine kinase      | Yes | Novel | 58 | 7 | 64.6 | 1 | Inflammation                                                                                            | 19 | 1 | 18 | 0  | 10 | 8  | 2          | Antagonism                   | Not reported                                                                                                                         | No evidence                                                                                                                                                                                                                                                                                                                                                                                                                                                                                                                                                               | NA         | Yes     | Group 4 | -                                                                                              | Antagonist for cancer: ERK is involved in innate immune system during healthy aging.                                                                                                                                                                                                                                                                       |                                                |
| CDC34   | Acyltransferase      | No  | Novel | 59 | 7 | 69.7 | 2 | Genomic instability, Impaired proteostasis                                                              | 14 | 9 | 5  | 0  | 9  | 6  | 3          | Antagonism                   | Not reported                                                                                                                         | No evidence                                                                                                                                                                                                                                                                                                                                                                                                                                                                                                                                                               | NA         | Yes     | Group 4 | -                                                                                              | Antagonist for cancer: CDC34 is involved in adaptive immune system during healthy aging.                                                                                                                                                                                                                                                                   |                                                |
| CSF2RB  | Immunoglobulin       | Yes | Novel | 60 | 6 | 37.3 | 1 | Inflammation                                                                                            | 12 | 3 | 9  | 3  | 6  | 2  | 4          | Antagonism*                  | Not reported                                                                                                                         | Not reported                                                                                                                                                                                                                                                                                                                                                                                                                                                                                                                                                              | NA         | Yes     | Group 4 | -                                                                                              | Upregulation of CSF2RB may increase the production of Interleukin-3, Interleukin-5 and GM-CSF, leading to inflammation                                                                                                                                                                                                                                     |                                                |
| VRK1    | Protein kinase       | No  | Novel | 61 | 6 | 37.5 | 1 | Cellular senescence                                                                                     | 19 | 1 | 18 | 0  | 10 | 10 | 0          | Antagonism                   | Reported; Lifespan extension                                                                                                         | Pro-Longevity: VRK1 RNAi decreased lifespan by 26% in <i>C. elegans</i> .<br>VRK1 extended lifespan by activation of AMPK via phosphorylation in <i>C. elegans</i> .<br>No evidence                                                                                                                                                                                                                                                                                                                                                                                       | Agonism    | Yes     | Group 2 | Age, SynergyAge, pape                                                                          | Antagonist for cancer.                                                                                                                                                                                                                                                                                                                                     | PMID: 1800689, PMID: 32937443                  |
| HITF    | Acyltransferase      | No  | Novel | 62 | 6 | 41.7 | 3 | Cellular senescence, Epigenetic shift, Impaired proteostasis                                            | 20 | 5 | 15 | 0  | 9  | 9  | 0          | Antagonism                   | Not reported                                                                                                                         | No evidence                                                                                                                                                                                                                                                                                                                                                                                                                                                                                                                                                               | NA         | Yes     | Group 4 | -                                                                                              | Antagonist for cancer; but loss of HITF function promotes intestinal carcinogenesis                                                                                                                                                                                                                                                                        | PMID: 2245292                                  |
| STK26   | Protein kinase       | No  | Novel | 63 | 6 | 44.7 | 1 | Genomic instability                                                                                     | 20 | 0 | 20 | 0  | 10 | 7  | 3          | Antagonism                   | Not reported                                                                                                                         | No evidence                                                                                                                                                                                                                                                                                                                                                                                                                                                                                                                                                               | NA         | Yes     | Group 4 | -                                                                                              | Antagonist for cancer, but depletion of STK24 (or MST4) in mice promoted gastric tumorigenesis.                                                                                                                                                                                                                                                            | PMID: 32271880                                 |
| PHKA    | Non-protein kinase   | No  | Novel | 64 | 6 | 46.3 | 0 | -                                                                                                       | 20 | 1 | 19 | 0  | 6  | 2  | 4          | Antagonism*                  | Not reported                                                                                                                         | No evidence                                                                                                                                                                                                                                                                                                                                                                                                                                                                                                                                                               | NA         | No      | -       | -                                                                                              | Overexpression of PHKA is associated with undifferentiated status and poor prognosis of human hepatocellular carcinoma. Target did not associate with any ageing hallmarks                                                                                                                                                                                 | PMID: 2439405                                  |
| PSMC5   | Hydrolase            | Yes | Novel | 65 | 6 | 46.3 | 1 | Impaired proteostasis                                                                                   | 19 | 3 | 16 | 1  | 8  | 7  | 1          | Antagonism                   | Reported; Reduced lifespan only                                                                                                      | Pro-Longevity: rps-6 RNAi decreased lifespan by 38.16% in <i>C. elegans</i> .<br>No evidence                                                                                                                                                                                                                                                                                                                                                                                                                                                                              | NA         | Yes     | Group 3 | SynergyAge                                                                                     | Antagonist for cancer: PSMC5 is involved in cell cycle checkpoint during healthy aging.                                                                                                                                                                                                                                                                    | PMID: 17392428                                 |
| CPSF3   | Esterase             | No  | Novel | 66 | 6 | 46.7 | 0 | -                                                                                                       | 21 | 0 | 21 | 0  | 9  | 9  | 0          | Antagonism                   | Not reported                                                                                                                         | No evidence                                                                                                                                                                                                                                                                                                                                                                                                                                                                                                                                                               | NA         | No      | -       | -                                                                                              | Target did not associate with any ageing hallmarks                                                                                                                                                                                                                                                                                                         |                                                |
| RPS6KB2 | AGC kinase           | Yes | Novel | 67 | 6 | 47.3 | 2 | Impaired proteostasis, Telomere attrition                                                               | 12 | 1 | 11 | 7  | 6  | 5  | 1          | Antagonism                   | Reported; Lifespan extension                                                                                                         | Anti-Longevity: Dominant-negative mutant increased lifespan by 22% in <i>Drosophila</i> .<br>Constitutively active mutant decreased lifespan by 32% in <i>Drosophila</i> .<br>RNA interference reduces S6K (rks-1) mRNA levels by about two-fold extended mean lifespan 13-47% and maximum lifespan by up to 40% in <i>C. elegans</i> .<br>Deletion mutants also lived longer. RNAi resulted in a 22% maximum lifespan increase in <i>C. elegans</i> . In the rks-1 (ok125) mutant background, inhibition of ifg-1 led to a further extension of 40% in maximum lifespan. | Antagonism | Yes     | Group 1 | GenAge                                                                                         | Antagonist for cancer: Drug target of NCI-236333A and LY-270301 investigated in clinical trial (NCT01971515, NCT02008784 and NCT01157511) for cancer treatment.                                                                                                                                                                                            | PMID: 15186745, PMID: 17266679, PMID: 17266680 |
| CTSV    | Peptidase            | No  | Novel | 68 | 6 | 50.0 | 3 | Extracellular matrix stiffness, Impaired proteostasis, Inflammation                                     | 12 | 2 | 10 | 0  | 10 | 9  | 1          | Antagonism                   | Not reported                                                                                                                         | No evidence                                                                                                                                                                                                                                                                                                                                                                                                                                                                                                                                                               | NA         | Yes     | Group 4 | -                                                                                              | Antagonist for cancer - CTSV promotes bladder cancer progression, and our data showed its upregulation in cancer. CTSV is involved in innate immune system, adaptive immune system and collagen formation for healthy aging.                                                                                                                               | PMID: 35443863                                 |
| KSR1    | Tyrosine kinase-like | No  | Novel | 69 | 6 | 50.2 | 1 | Impaired proteostasis                                                                                   | 14 | 7 | 7  | 3  | 6  | 1  | 5          | Antagonism*                  | Not reported                                                                                                                         | No evidence                                                                                                                                                                                                                                                                                                                                                                                                                                                                                                                                                               | NA         | Yes     | Group 4 | -                                                                                              | Antagonist for cancer: Evidence suggests antagonist for cancer treatment: (1) tumor-bearing KSR1 deficiency mice showed significant improvement in all-cause mortality, and (2) the growth of M1-driven mammary tumor was moderately slowed in ksr1 <sup>-/-</sup> mice, although our data showed KSR1 downregulation in cancer.                           | PMID: 2959465, PMID: 1287031, PMID: 1609797    |
| UBE2L6  | Acyltransferase      | No  | Novel | 70 | 6 | 52.8 | 1 | Impaired proteostasis                                                                                   | 10 | 8 | 2  | 0  | 8  | 6  | 2          | Antagonism                   | Not reported                                                                                                                         | No evidence                                                                                                                                                                                                                                                                                                                                                                                                                                                                                                                                                               | NA         | Yes     | Group 4 | -                                                                                              | Antagonist for cancer: UBE2L6 is involved in adaptive immune system and DNA repair during healthy aging.                                                                                                                                                                                                                                                   |                                                |
| PSMB4   | Peptidase            | Yes | Novel | 71 | 6 | 54.0 | 3 | Impaired proteostasis, Inflammation, Mitochondrial dysfunction                                          | 19 | 1 | 18 | 1  | 8  | 8  | 0          | Antagonism                   | Reported; Reduced lifespan only                                                                                                      | Pro-Longevity: rps-7 RNAi decreased lifespan by 34.78% in <i>C. elegans</i> .<br>No evidence                                                                                                                                                                                                                                                                                                                                                                                                                                                                              | NA         | Yes     | Group 3 | SynergyAge                                                                                     | Antagonist for cancer but PSMB4 is important for cell cycle checkpoint during healthy aging                                                                                                                                                                                                                                                                | PMID: 17392428                                 |
| PSMA1   | Peptidase            | Yes | Novel | 72 | 6 | 55.3 | 2 | Impaired proteostasis, Inflammation                                                                     | 22 | 0 | 22 | 1  | 9  | 9  | 0          | Antagonism                   | Reported; Reduced lifespan only                                                                                                      | Pro-Longevity: pa-6 RNAi decreased lifespan by 31.88% in <i>C. elegans</i> .<br>No evidence                                                                                                                                                                                                                                                                                                                                                                                                                                                                               | NA         | Yes     | Group 3 | SynergyAge                                                                                     | Antagonist for cancer: PSMA1 is involved in cell cycle checkpoint during healthy aging.                                                                                                                                                                                                                                                                    | PMID: 17392428                                 |

| Gene   | Enzyme              | Novel | 73    | 6   | 58.8 | 0    |   | 12                                                                                                                                          | 8  | 4 | 0  | 11 | 11 | 0  | Antagonism | Reported; Reduced lifespan only | Pro-Longevity: Hel-1 downregulation resulted in a 9.3% decrease in lifespan compared to wild type in <i>C. elegans</i> . This effect was even more pronounced in <i>dat-2</i> mutants which showed a 26.0% decrease in lifespan. The results suggested that hel-1 promoted longevity [1]. | NA                                                                                                                                                                                                                                | No      | -   | GenAge  | Target did not associate with any aging hallmarks | PMID: 26195740                                                                                                                                                                                                                                                                                                                                                                                                                                                                                                                                                                                                                                                                       |                                                                |
|--------|---------------------|-------|-------|-----|------|------|---|---------------------------------------------------------------------------------------------------------------------------------------------|----|---|----|----|----|----|------------|---------------------------------|-------------------------------------------------------------------------------------------------------------------------------------------------------------------------------------------------------------------------------------------------------------------------------------------|-----------------------------------------------------------------------------------------------------------------------------------------------------------------------------------------------------------------------------------|---------|-----|---------|---------------------------------------------------|--------------------------------------------------------------------------------------------------------------------------------------------------------------------------------------------------------------------------------------------------------------------------------------------------------------------------------------------------------------------------------------------------------------------------------------------------------------------------------------------------------------------------------------------------------------------------------------------------------------------------------------------------------------------------------------|----------------------------------------------------------------|
| BAZ1B  | Tyrosine kinase     | No    | Novel | 74  | 6    | 64.0 | 2 | Cellular senescence, Epigenetic shift                                                                                                       | 24 | 3 | 21 | 0  | 9  | 9  | 0          | Antagonism                      | Not reported                                                                                                                                                                                                                                                                              | No evidence                                                                                                                                                                                                                       | NA      | Yes | Group 4 | -                                                 | Antagonist for cancer. BAZ1B is involved in DNA double-strand break repair during healthy aging.                                                                                                                                                                                                                                                                                                                                                                                                                                                                                                                                                                                     |                                                                |
| TRK    | Protein kinase      | No    | Novel | 75  | 6    | 70.3 | 1 | Genomic instability                                                                                                                         | 20 | 1 | 19 | 0  | 11 | 11 | 0          | Antagonism                      | Not reported                                                                                                                                                                                                                                                                              | No evidence                                                                                                                                                                                                                       | NA      | Yes | Group 4 | -                                                 |                                                                                                                                                                                                                                                                                                                                                                                                                                                                                                                                                                                                                                                                                      |                                                                |
| CANT1  | Hydrolase           | No    | Novel | 76  | 6    | 71.0 | 3 | Epigenetic shift, Genomic instability, Inflammation                                                                                         | 26 | 0 | 26 | 0  | 10 | 8  | 2          | Antagonism                      | Reported; Reduced lifespan only                                                                                                                                                                                                                                                           | Pro-Longevity: my-1 RNAi decreased lifespan in <i>C. elegans</i> .                                                                                                                                                                | NA      | Yes | Group 3 | GenAge                                            | Antagonist for cancer. CANT1 is involved in innate immune system during healthy aging.                                                                                                                                                                                                                                                                                                                                                                                                                                                                                                                                                                                               | PMID: 18216284                                                 |
| TRAF7  | Acyltransferase     | No    | Novel | 77  | 6    | 72.7 | 3 | Altered intercellular communications, Genomic instability, Impaired proteostasis                                                            | 17 | 0 | 17 | 1  | 10 | 10 | 0          | Antagonism                      | Not reported                                                                                                                                                                                                                                                                              | No evidence                                                                                                                                                                                                                       | NA      | Yes | Group 4 | -                                                 | Tumor suppressor gene                                                                                                                                                                                                                                                                                                                                                                                                                                                                                                                                                                                                                                                                |                                                                |
| HIPK1  | CMGC kinase         | No    | Novel | 78  | 5    | 28.8 | 3 | Altered intercellular communications, Cellular senescence, Genomic instability                                                              | 18 | 1 | 17 | 0  | 8  | 2  | 6          | Antagonism*                     | Reported; Reduced lifespan only                                                                                                                                                                                                                                                           | Pro-Longevity: hpk-1 RNAi decreased lifespan by 35% in <i>C. elegans</i> .                                                                                                                                                        | NA      | Yes | Group 3 | GenAge                                            | Our data showed downregulation in cancer, suggesting agonist for cancer treatment. However, oncogenically transformed HIPK1 <sup>-/-</sup> mouse embryonic fibroblasts were more susceptible than transformed HIPK1 <sup>+/+</sup> cells to apoptosis induced by DNA damage, and carcinogen-treated HIPK1 <sup>-/-</sup> mice developed fewer and smaller skin tumors than HIPK1 mice. HIPK1 drives p53 activation to limit colorectal cancer cell growth                                                                                                                                                                                                                            | PMID: 23678219, PMID: 12702766, PMID: 18006889                 |
| PSMA2  | Peptidase           | Yes   | Novel | 79  | 5    | 34.0 | 1 | Impaired proteostasis                                                                                                                       | 20 | 0 | 20 | 1  | 10 | 8  | 2          | Antagonism                      | Not reported                                                                                                                                                                                                                                                                              | No evidence                                                                                                                                                                                                                       | NA      | Yes | Group 4 | -                                                 | PSMA2 is involved in cell cycle checkpoint during healthy aging                                                                                                                                                                                                                                                                                                                                                                                                                                                                                                                                                                                                                      |                                                                |
| PPP2CB | Esterase            | Yes   | Novel | 80  | 5    | 36.4 | 6 | Altered intercellular communications, Epigenetic shift, Genomic instability, Impaired proteostasis, Inflammation, Mitochondrial dysfunction | 17 | 3 | 14 | 6  | 9  | 1  | 8          | Antagonism*                     | Reported; reduced lifespan only                                                                                                                                                                                                                                                           | Pro-Longevity: let 92 RNAi decreased lifespan in <i>C. elegans</i> .                                                                                                                                                              | NA      | Yes | Group 3 | -                                                 | Antagonist for cancer. LB-100, PPP2CB inhibitor, was investigated for the treatment of glioblastoma and oligodendroglioma (phase II). LB-100 targets PPP2CB, PPP3C, and PPP3CA. LB-100 exhibits anti-cancer activity via its chemo- and radio-sensitizing properties. However, our data showed downregulation in PPP2CB in cancer is inconsistent with the evidence that inhibiting PPP2CB exhibits anti-cancer activities. Besides, PPP2CB is important for cell cycle checkpoint and adaptive immune system during healthy aging.                                                                                                                                                  | PMID: 25897893, PMID: 33118570                                 |
| GAK    | Protein kinase      | No    | Novel | 81  | 5    | 38.2 | 1 | Impaired proteostasis                                                                                                                       | 12 | 9 | 3  | 0  | 9  | 6  | 3          | Antagonism                      | Reported; reduced lifespan only                                                                                                                                                                                                                                                           | Pro-Longevity: aux RNAi decreased lifespan in <i>Drosophila</i> .                                                                                                                                                                 | NA      | Yes | Group 3 | -                                                 | Antagonist for cancer. GAK knockdown by siRNA decreased cell proliferation in osteosarcoma. GAK ablation in mice causes kidney failure due to calcium activation                                                                                                                                                                                                                                                                                                                                                                                                                                                                                                                     | PMID: 20881269, PMID: 3320557, PMID: 28147270                  |
| TTC    | Tyrosine kinase     | Yes   | Novel | 82  | 5    | 40.8 | 3 | Extracellular matrix stiffness, Inflammation, Stem cell exhaustion                                                                          | 8  | 5 | 3  | 1  | 9  | 5  | 4          | Antagonism*                     | Reported; Reduced lifespan only                                                                                                                                                                                                                                                           | Pro-Longevity: tk29a fcd <sup>1</sup> null mutation decreased lifespan in <i>Drosophila</i> . Bk29A is the sole Tec family member in <i>Drosophila</i> .                                                                          | NA      | Yes | Group 3 | -                                                 | TTC kinase stabilized PLK1 to promote liver cancer metastasis.                                                                                                                                                                                                                                                                                                                                                                                                                                                                                                                                                                                                                       | PMID: 16023106, PMID: 34637843                                 |
| UBA2   | Acyltransferase     | No    | Novel | 83  | 5    | 44.8 | 1 | Impaired proteostasis                                                                                                                       | 18 | 2 | 16 | 0  | 8  | 8  | 0          | Antagonism                      | Not reported                                                                                                                                                                                                                                                                              | No evidence                                                                                                                                                                                                                       | NA      | Yes | Group 4 | -                                                 | UBA2 is a heterodimer, acting as an E1 ligase for SUMO1, SUMO2, SUMO3, and probably SUMO4. Antagonist for cancer. UBA2 could promote cell migration and invasion through Wnt/β-catenin signaling in gastric cancer. UBA2 knockdown and inhibiting SAH1/UBA2-mediated SUMOylation resulted in reduced glycolysis. SUMOylation of Ikbα has a strong inhibitory effect on NF-κB-dependent transcription, and SUMOylation of p53 prevents its proteasome degradation.                                                                                                                                                                                                                    | PMID: 30479464, PMID: 22088449, PMID: 31783344, PMID: 32938830 |
| RAB1B  | Hydrolase           | No    | Novel | 84  | 5    | 53.4 | 2 | Impaired proteostasis, Mitochondrial dysfunction                                                                                            | 24 | 0 | 24 | 0  | 8  | 5  | 3          | Antagonism                      | Not reported                                                                                                                                                                                                                                                                              | No evidence                                                                                                                                                                                                                       | NA      | Yes | Group 4 | -                                                 | RAB1B is involved in cell cycle regulation during healthy aging.                                                                                                                                                                                                                                                                                                                                                                                                                                                                                                                                                                                                                     |                                                                |
| PLXNA2 | Receptor            | No    | Novel | 85  | 5    | 58.6 | 0 |                                                                                                                                             | 12 | 2 | 10 | 0  | 8  | 2  | 6          | Antagonism*                     | Not reported                                                                                                                                                                                                                                                                              | No evidence                                                                                                                                                                                                                       | NA      | No  | -       | -                                                 | Target did not associate with any aging hallmarks                                                                                                                                                                                                                                                                                                                                                                                                                                                                                                                                                                                                                                    |                                                                |
| PSM7   | Peptidase           | Yes   | Novel | 86  | 5    | 63.0 | 1 | Impaired proteostasis                                                                                                                       | 18 | 1 | 17 | 1  | 7  | 7  | 0          | Antagonism                      | Reported; Reduced lifespan only                                                                                                                                                                                                                                                           | Pro-Longevity: pbs-2 RNAi decreased lifespan by 31.88% in <i>C. elegans</i> .                                                                                                                                                     | NA      | Yes | Group 3 | Synergy Age                                       | PSM7 is involved in cell cycle checkpoint during healthy aging                                                                                                                                                                                                                                                                                                                                                                                                                                                                                                                                                                                                                       | PMID: 17392428                                                 |
| KMT2B  | Methyltransferase   | No    | Novel | 87  | 5    | 65.2 | 0 |                                                                                                                                             | 15 | 2 | 13 | 0  | 8  | 7  | 1          | Antagonism                      | Not reported                                                                                                                                                                                                                                                                              | No evidence                                                                                                                                                                                                                       | NA      | No  | -       | -                                                 | Target did not associate with any aging hallmarks                                                                                                                                                                                                                                                                                                                                                                                                                                                                                                                                                                                                                                    |                                                                |
| TRIM7  | Acyltransferase     | No    | Novel | 88  | 5    | 76.8 | 5 | Altered intercellular communications, Epigenetic shift, Genomic instability, Impaired proteostasis, Inflammation                            | 29 | 1 | 28 | 0  | 8  | 8  | 0          | Antagonism                      | Not reported                                                                                                                                                                                                                                                                              | No evidence                                                                                                                                                                                                                       | NA      | Yes | Group 4 | -                                                 | Antagonist for cancer. TRIM7 is involved in adaptive immune system during healthy aging                                                                                                                                                                                                                                                                                                                                                                                                                                                                                                                                                                                              |                                                                |
| MTHFD2 | Oxidoreductase      | No    | Novel | 89  | 4    | 23.3 | 3 | Deregulated nutrient signaling, Epigenetic shift, Mitochondrial dysfunction                                                                 | 9  | 1 | 8  | 0  | 8  | 8  | 0          | Antagonism                      | Reported; Lifespan extension                                                                                                                                                                                                                                                              | Pro-Longevity: Ubiquitous Nmdc overexpression increased lifespan by 230% in <i>Drosophila</i> . Nmdc1a for body-specific overexpression increased lifespan by 23% in male <i>Drosophila</i> and 14% in female <i>Drosophila</i> . | Agonism | Yes | Group 2 | GenAge                                            | Antagonist for cancer. MTHFD2 is involved in metabolism of water-soluble vitamins and cofactors during healthy aging                                                                                                                                                                                                                                                                                                                                                                                                                                                                                                                                                                 | PMID: 26319556                                                 |
| TAOK1  | Protein kinase      | No    | Novel | 90  | 4    | 41.3 | 2 | Cellular senescence, Genomic instability                                                                                                    | 23 | 2 | 21 | 2  | 6  | 5  | 1          | Antagonism                      | Not reported                                                                                                                                                                                                                                                                              | No evidence                                                                                                                                                                                                                       | NA      | Yes | Group 4 | -                                                 | Antagonist for cancer. TAOK1 is involved for cell cycle checkpoints during healthy aging. Antagonism or agonism depends on cancer types. Inconsistent dysregulation (upregulate and downregulate) in different cancers. ARL2 inhibits the proliferation, migration and tumorigenicity of glioma cells.                                                                                                                                                                                                                                                                                                                                                                               |                                                                |
| ARL2   | Hydrolase           | No    | Novel | 91  | 4    | 49.5 | 1 | Mitochondrial dysfunction                                                                                                                   | 13 | 4 | 9  | 0  | 9  | 4  | 5          | Antagonism                      | Not reported                                                                                                                                                                                                                                                                              | No evidence                                                                                                                                                                                                                       | NA      | Yes | Group 4 | -                                                 | ARL2 was first reported to behave as a tumor suppressor in breast cancer. In contrast, miR-214 down-regulates ARL2 and suppresses growth and invasion of cervical cancer cells. ARL2 is required for homologous recombination repair in colon cancer stem cells.                                                                                                                                                                                                                                                                                                                                                                                                                     | PMID: 28043637, PMID: 2342332, PMID: 28137590, PMID: 35567502  |
| HEL2   | Hydrolase           | No    | Novel | 92  | 4    | 50.5 | 0 |                                                                                                                                             | 12 | 2 | 10 | 0  | 9  | 9  | 0          | Antagonism                      | Not reported                                                                                                                                                                                                                                                                              | No evidence                                                                                                                                                                                                                       | NA      | No  | -       | -                                                 | Target did not associate with any aging hallmarks                                                                                                                                                                                                                                                                                                                                                                                                                                                                                                                                                                                                                                    |                                                                |
| PIPK1A | Non-protein kinase  | No    | Novel | 93  | 4    | 50.8 | 3 | Cellular senescence, Deregulated nutrient signaling, Extracellular matrix stiffness                                                         | 9  | 3 | 6  | 1  | 9  | 9  | 0          | Antagonism                      | Not reported                                                                                                                                                                                                                                                                              | No evidence                                                                                                                                                                                                                       | NA      | Yes | Group 4 | -                                                 |                                                                                                                                                                                                                                                                                                                                                                                                                                                                                                                                                                                                                                                                                      |                                                                |
| CLOCK  | Acyltransferase     | No    | Novel | 94  | 4    | 53.0 | 7 | Cellular senescence, Deregulated nutrient signaling, Epigenetic shift, Genomic instability, Impaired proteostasis, Inflammation             | 31 | 3 | 28 | 0  | 5  | 3  | 2          | Antagonism*                     | Reported; Reduced lifespan only                                                                                                                                                                                                                                                           | The average lifespan of Clock <sup>-/-</sup> mice is reduced by 15% compared with wild type mice, while maximum lifespan is reduced by more than 20%.                                                                             | NA      | Yes | Group 3 | GenAge                                            | Age-related changes of clock gene expression promote declining autophagy levels                                                                                                                                                                                                                                                                                                                                                                                                                                                                                                                                                                                                      | PMID: 21149897, PMID: 2751392, PMID: 21566258                  |
| PSMC1  | Hydrolase           | Yes   | Novel | 95  | 4    | 55.0 | 1 | Impaired proteostasis                                                                                                                       | 30 | 0 | 30 | 0  | 10 | 9  | 1          | Antagonism                      | Not reported                                                                                                                                                                                                                                                                              | No evidence                                                                                                                                                                                                                       | NA      | Yes | Group 4 | -                                                 | Antagonist for cancer. PSMC1 is involved in cell cycle checkpoint during healthy aging                                                                                                                                                                                                                                                                                                                                                                                                                                                                                                                                                                                               |                                                                |
| USP11  | Peptidase           | No    | Novel | 96  | 4    | 56.3 | 1 | Impaired proteostasis                                                                                                                       | 14 | 9 | 5  | 0  | 11 | 6  | 5          | Antagonism                      | Not reported                                                                                                                                                                                                                                                                              | No evidence                                                                                                                                                                                                                       | NA      | Yes | Group 4 | -                                                 | Antagonist for cancer. USP11 is involved in regulating p53 stability by deubiquitinating p53.                                                                                                                                                                                                                                                                                                                                                                                                                                                                                                                                                                                        | PMID: 2547832                                                  |
| PSMB1  | Peptidase           | Yes   | Novel | 97  | 4    | 56.8 | 1 | Impaired proteostasis                                                                                                                       | 12 | 1 | 11 | 1  | 6  | 6  | 0          | Antagonism                      | Reported; No effects on lifespan                                                                                                                                                                                                                                                          | No evidence on modulating longevity. pbs-6 RNAi did not change lifespan in <i>C. elegans</i> .                                                                                                                                    | NA      | Yes | Group 4 | Synergy Age                                       | PSMB1 is involved in cell cycle checkpoint during healthy aging                                                                                                                                                                                                                                                                                                                                                                                                                                                                                                                                                                                                                      | PMID: 17392428                                                 |
| GALNT2 | Glycosyltransferase | No    | Novel | 98  | 4    | 57.0 | 0 |                                                                                                                                             | 20 | 0 | 20 | 0  | 8  | 7  | 1          | Antagonism                      | Not reported                                                                                                                                                                                                                                                                              | No evidence                                                                                                                                                                                                                       | NA      | No  | -       | -                                                 | Target did not associate with any aging hallmarks                                                                                                                                                                                                                                                                                                                                                                                                                                                                                                                                                                                                                                    |                                                                |
| RPS6A6 | AGC kinase          | Yes   | Novel | 99  | 4    | 57.5 | 4 | Cellular senescence, Genomic instability, Impaired proteostasis, Mitochondrial dysfunction                                                  | 19 | 5 | 14 | 2  | 8  | 2  | 6          | Antagonism*                     | Not reported                                                                                                                                                                                                                                                                              | No evidence                                                                                                                                                                                                                       | NA      | Yes | Group 4 | -                                                 | p90RSK inhibitor, TAS0612, was investigated for neoplasm in phase I trial, but our data showed downregulation of RPS6A6 in cancers. Depletion of S6K1 resembles gene expression patterns of caloric restriction or prolongs lifespan in pharmacological activation of AMPK in mice. S6K1 regulates glucose metabolism via feedback regulation of insulin receptor substrate 1 to improve glucose tolerance and insulin sensitivity in liver-specific and systemic S6K1-deficient mice. Knockdown of RPS6A6 significantly mimicked the expression of p53, p21 and Bax/Bcl2 in HCC cells, resulting in apoptosis amongst. HERS3 was over-expressed in both HCC tissue samples and cell | PMID: 19797661, PMID: 22491495, PMID: 15308621                 |
| HERC5  | Acyltransferase     | No    | Novel | 100 | 4    | 59.3 | 2 | Impaired proteostasis, Inflammation                                                                                                         | 7  | 3 | 4  | 0  | 8  | 2  | 6          | Antagonism*                     | Not reported                                                                                                                                                                                                                                                                              | No evidence                                                                                                                                                                                                                       | NA      | Yes | Group 4 | -                                                 |                                                                                                                                                                                                                                                                                                                                                                                                                                                                                                                                                                                                                                                                                      | PMID: 28919514                                                 |

[1] Two novelty settings (high-confidence setting and novel settings) were applied for target identification  
[2] Top 100 AI-derived targets for each cancer were ranked by PanBioMetric, yielding a list of 301 high-confidence and 319 novel targets (ranked as top 100 in at least 1 cancer) across 11 cancers. Based on the occurrence and average ranking, the overall top-100 AI-derived common high-confidence and novel cancer targets were identified, yielding a list of 200 common cancer targets.  
[3] The association of targets with 12 aging hallmarks were based on Gene Ontology terms  
[4] The association of targets with 10 cancer hallmarks were based on CHG database and COSMIC.  
[5] Targeting the gene that can increase the susceptibility to cancer or metastasis was marked with asterisk.  
[6] Generally, upregulation in expression leads to proposed agonist for cancer; downregulation in expression leads to proposed antagonist for cancer. \* The therapeutic approach is proposed based on target's mechanism of action  
[7] Target wheel is shown in Figure 4

Table S7. Potential dual-purpose candidates for delaying aging and anti-cancer treatment

| Group-4 targets[1] | Clinical trial status | Novelty | Occurrence in any overlapped biological processes[2] | Therapeutic approach for cancer treatment[3] | Predicted therapeutic approach for healthy anti-aging | Potential dual-purpose candidass | Role in healthy aging                                                                                                                                                                                | References                                           |
|--------------------|-----------------------|---------|------------------------------------------------------|----------------------------------------------|-------------------------------------------------------|----------------------------------|------------------------------------------------------------------------------------------------------------------------------------------------------------------------------------------------------|------------------------------------------------------|
| ADRA2C             | Yes                   | Novel   | ✓                                                    | Agonism                                      | Agonism                                               | ✓                                | Guanfacine hydrochloride agonising ADRA2A, ADRA2B and ADRA2C extended lifespan in <i>C. elegans</i> .                                                                                                | PMID: 24134630                                       |
| AKT3               | Yes                   | HC      | ✓                                                    | Antagonism*                                  | Antagonism                                            | ✓                                | Aging-induced Akt activation involves in aging-related pathologies and Aβ-induced toxicity                                                                                                           | PMID: 31183966                                       |
| CSF2RB             | Yes                   | Novel   | ✓                                                    | Antagonism*                                  | Antagonism                                            | ✓                                | Upregulation of CSF2RB may increase the production of Interleukin-3, Interleukin-5 and GM-CSF, leading to inflammation                                                                               | -                                                    |
| FASN               | Yes                   | HC      | ✓                                                    | Antagonism                                   | Antagonism                                            | ✓                                | FANS inhibitor prevented the initiation of senescence induction in hematopoietic stem cells and reduced the effect of the activation of senescence on different age-associated diseases.             | PMID: 30962418,<br>PMID: 29020644                    |
| FGR                | Yes                   | Novel   | ✓                                                    | Antagonism*                                  | Antagonism                                            | ✓                                | DEHP/DEP (increasing fasn-1 expression, and affecting other lipid metabolic genes) treated <i>C. elegans</i> lifespan decreased.                                                                     | PMID: 35292270                                       |
| HCK                | Yes                   | Novel   | ✓                                                    | Antagonism                                   | Antagonism                                            | ✓                                | FGR inhibitor, such as dasatinib was investigated for cancer, although our data showed FGR downregulation in cancers.                                                                                | PMID: 12208875                                       |
| HDAC2              | Yes                   | HC      | ✓                                                    | Antagonism                                   | Antagonism                                            | ✓                                | Dasatinib and quercetin restore α-Klotho in mice and humans, which may amplify protection against aging and age-related diseases.                                                                    | PMID: 33790287                                       |
| HMGB1              | Yes                   | HC      | ✓                                                    | Antagonism                                   | Antagonism                                            | ✓                                | Constitutive activation of the SRC family kinase Hck results in spontaneous pulmonary inflammation and an enhanced innate immune response.                                                           | PMID: 30988279,<br>PMID: 27466339                    |
| IL1B               | Yes                   | HC      | ✓                                                    | Antagonism                                   | Antagonism                                            | ✓                                | Inactivating histone deacetylase HDA promotes longevity by mobilizing trehalose metabolism.                                                                                                          | PMID: 30988157,<br>PMID: 34746709                    |
| ITGAV              | Yes                   | HC      | ✓                                                    | Antagonism                                   | Antagonism                                            | ✓                                | HMGB1 mediates neuroinflammatory priming in the aged brain.                                                                                                                                          | PMID: 32064162,<br>PMID: 17071038,<br>PMID: 22547695 |
| KDM1A              | Yes                   | HC      | ✓                                                    | Antagonism                                   | Antagonism                                            | ✓                                | Blocking the actions of HMGB1 appears to "desensitize" aged microglia to an immune challenge, thereby preventing exaggerated behavioral and neuroinflammatory responses following infection          | PMID: 32469975                                       |
| KDM2A              | No                    | Novel   | ✓                                                    | Antagonism                                   | Antagonism                                            | ✓                                | IL-1α and IL-1β signal upregulate the senescence-associated secretory phenotype in a cooperative manner.                                                                                             | PMID: 27029061,<br>PMID: 33462408                    |
| KRAS               | Yes                   | HC      | ✓                                                    | Antagonism                                   | Antagonism                                            | ✓                                | IL-1β promotes the age-associated decline of beta cell function                                                                                                                                      | PMID: 29276789,<br>PMID: 26119340                    |
| LYN                | Yes                   | Novel   | ✓                                                    | Antagonism                                   | Antagonism                                            | ✓                                | ITGB5 served as a ligand for Cyr61, a molecule stimulating the production of IL-6, which is considered an aging biomarker, via itgav/itgb5/Akt/NF-κB signaling pathway in rheumatoid arthritis       | PMID: 19171907                                       |
| MET                | Yes                   | HC      | ✓                                                    | Antagonism                                   | Antagonism                                            | ✓                                | KDM1A, is a drug target of IMG-7289, lysine-specific demethylase 1 inhibitor, investigated for the treatment of leukemia in trial (NCT02842827).                                                     | PMID: 28677234                                       |
| MMP2               | Yes                   | HC      | ✓                                                    | Antagonism                                   | Antagonism                                            | ✓                                | Modulation of KDM1A with vafidemstat (KDM1A inhibitor) rescues memory deficit and behavioral alterations in mice                                                                                     | PMID: 15831360                                       |
| MST1R              | Yes                   | Novel   | ✓                                                    | Antagonism                                   | Antagonism                                            | ✓                                | KDM2A deficiency in macrophages enhances thermogenesis to protect mice against HFD-induced obesity.                                                                                                  | PMID: 30967626,<br>PMID: 28248933                    |
| RARA               | Yes                   | HC      | ✓                                                    | Agonism                                      | Agonism                                               | ✓                                | Genetic inhibition of Ras was found to extend lifespan.                                                                                                                                              | PMID: 28849147                                       |
| RARB               | Yes                   | HC      | ✓                                                    | Agonism                                      | Agonism                                               | ✓                                | Adult-onset administration of the drug trametinib inhibiting MAP2K1 and MAP2K2, a highly specific inhibitor of Ras-Erk-ETS signaling, extended lifespan in <i>Drosophila</i> .                       | PMID: 28849147                                       |
| RPS6KA2            | Yes                   | Novel   | ✓                                                    | Antagonism*                                  | Antagonism                                            | ✓                                | LYN suppresses osteoclastogenesis in vitro and in vivo.                                                                                                                                              | -                                                    |
| RPS6KA4            | No                    | Novel   | ✓                                                    | Antagonism                                   | Antagonism                                            | ✓                                | MET activates RAS and AKT signaling.                                                                                                                                                                 | PMID: 35232347,<br>PMID: 19797661                    |
| RPS6KA6            | Yes                   | Novel   | ✓                                                    | Antagonism*                                  | Antagonism                                            | ✓                                | Aging is associated with increased matrix metalloproteinase-2 activity in the human aorta                                                                                                            | PMID: 19797661,<br>PMID: 22493495,<br>PMID: 15306821 |
| SRC                | Yes                   | HC      | ✓                                                    | Antagonism                                   | Antagonism                                            | ✓                                | MMP2 was considered as classical senescence-associated secretory phenotype (SASP).                                                                                                                   | -                                                    |
| ABL1               | Yes                   | HC      | ✓                                                    | Antagonism                                   | Not suitable for antagonism                           | x                                | MST1R inhibito prevents bone osteolysis.                                                                                                                                                             | PMID: 3201088                                        |
| ADGRE5             | No                    | Novel   | ✓                                                    | Antagonism                                   | Not suitable for antagonism                           | x                                | RAR agonist ameliorated the UV-induced damage to skin collagen fibers, and increased the collagen content in photoaged skin through RAR.                                                             | Reactome                                             |
| ANAPC2             | No                    | Novel   | ✓                                                    | Antagonism                                   | Not suitable for antagonism                           | x                                | RAR agonist ameliorated the UV-induced damage to skin collagen fibers, and increased the collagen content in photoaged skin through RAR.                                                             | PMID: 21191042                                       |
| AURKA              | Yes                   | HC      | ✓                                                    | Antagonism                                   | Not suitable for antagonism                           | x                                | Involved PI3K/AKT/MTOR signaling                                                                                                                                                                     | Reactome                                             |
| AURKB              | Yes                   | HC      | ✓                                                    | Antagonism                                   | Not suitable for antagonism                           | x                                | Depletion of S6k1 resembles gene expression patterns of caloric restriction or prolongs lifespan by pharmacological activation of AMPK in mice.                                                      | Reactome                                             |
| BAZ1B              | No                    | Novel   | ✓                                                    | Antagonism                                   | Not suitable for antagonism                           | x                                | Depletion of S6k1 resembles gene expression patterns of caloric restriction or prolongs lifespan by pharmacological activation of AMPK in mice.                                                      | Reactome                                             |
| BLK                | Yes                   | Novel   | ✓                                                    | Antagonism*                                  | Conditional                                           | x                                | S6K1 regulates glucose metabolism via feedback regulation of insulin receptor substrate 1 to improve glucose tolerance and insulin sensitivity in liver-specific and systematic S6k1-deficient mice. | PMID: 26583757                                       |
| CDC34              | No                    | Novel   | ✓                                                    | Antagonism                                   | Not suitable for antagonism                           | x                                | Dasatinib targeting SRC was considered as senolytic used to remove senescent cell.                                                                                                                   | Reactome                                             |
| CDK6               | Yes                   | HC      | ✓                                                    | Antagonism                                   | Not suitable for antagonism                           | x                                | ABL1 is important for DNA double-strand break repair during healthy aging.                                                                                                                           | Reactome                                             |
| CXCR4              | Yes                   | HC      | ✓                                                    | Antagonism                                   | Conditional                                           | x                                | Senolytic treatment reduces cell senescence. Quercetin, senolytic drug, inhibits multiple kinases including ABL1.                                                                                    | PMID: 26848769,<br>PMID: 32418119                    |
|                    |                       |         |                                                      |                                              | (Agonism for young, Antagonism for old)               |                                  | Imatinib mesylate inhibiting ABL1 reduced lifespan in <i>C. elegans</i> .                                                                                                                            |                                                      |
|                    |                       |         |                                                      |                                              |                                                       |                                  | ADGRE5 is involved in innate immune system during healthy aging.                                                                                                                                     |                                                      |
|                    |                       |         |                                                      |                                              |                                                       |                                  | ANAPC2 is involved in cell cycle checkpoint during healthy aging.                                                                                                                                    |                                                      |
|                    |                       |         |                                                      |                                              |                                                       |                                  | The anaphase promoting complex is required for memory function in mice                                                                                                                               |                                                      |
|                    |                       |         |                                                      |                                              |                                                       |                                  | AURKA is involved in cell cycle regulation during healthy aging                                                                                                                                      |                                                      |
|                    |                       |         |                                                      |                                              |                                                       |                                  | AURKA is involved in cell cycle checkpoing during healthy aging                                                                                                                                      |                                                      |
|                    |                       |         |                                                      |                                              |                                                       |                                  | BAZ1B is involved in DNA double-strand break repair during healthy aging.                                                                                                                            |                                                      |
|                    |                       |         |                                                      |                                              |                                                       |                                  | BLK is a pro-senescence kinase.                                                                                                                                                                      |                                                      |
|                    |                       |         |                                                      |                                              |                                                       |                                  | CDC34 is involved in adaptive immune system during healthy aging.                                                                                                                                    |                                                      |
|                    |                       |         |                                                      |                                              |                                                       |                                  | CDK6 is involved in cell cycle regulation during healthy aging                                                                                                                                       |                                                      |
|                    |                       |         |                                                      |                                              |                                                       |                                  | CXCR4 gene deletion in young mesenchymal stem cells accelerates an aging phenotype including increased production of reactive oxygen species, DNA damage, senescence, and reduced proliferation.     |                                                      |
|                    |                       |         |                                                      |                                              |                                                       |                                  | In contrast, CXCL12/CXCR4 promotes inflammation. Targeting CXCR4 for antiaging may be suitable for aged adults only.                                                                                 |                                                      |

|          |     |       |   |             |                             |   |                                                                                                                                                                                                                                                                                                                                                                                                                                                                               |                                                      |
|----------|-----|-------|---|-------------|-----------------------------|---|-------------------------------------------------------------------------------------------------------------------------------------------------------------------------------------------------------------------------------------------------------------------------------------------------------------------------------------------------------------------------------------------------------------------------------------------------------------------------------|------------------------------------------------------|
| DNM2     | No  | HC    | ✓ | Antagonism  | Not suitable for antagonism | x | Tumor suppressor gene                                                                                                                                                                                                                                                                                                                                                                                                                                                         | -                                                    |
| DNMT1    | Yes | HC    | ✓ | Antagonism  | Agonism                     | x | DNMT1 maintains genomic methylation stability and insufficient DNA methylation affects healthy aging and promotes age-related health problems                                                                                                                                                                                                                                                                                                                                 | PMID: 22704347,<br>PMID: 16510855                    |
| DNMT3A   | Yes | HC    | ✓ | Antagonism  | Agonism                     | x | No difference in longevity was observed between Dnmt1-deficient mice and normal controls.                                                                                                                                                                                                                                                                                                                                                                                     | PMID: 35635747                                       |
| DNMT3B   | No  | HC    | ✓ | Antagonism  | Agonism                     | x | Constitutive loss of DNMT3A causes morbid obesity through misregulation of adipogenesis                                                                                                                                                                                                                                                                                                                                                                                       | PMID: 33221743,<br>PMID: 33277576                    |
| FES      | No  | Novel | ✓ | Antagonism* | Not suitable for antagonism | x | DNMT3B plays a protective role against hepatocarcinogenesis caused by chronic inflammation via maintaining mitochondrial homeostasis.                                                                                                                                                                                                                                                                                                                                         | PMID:<br>322556211,<br>PMID: 10523632                |
| FGF2     | Yes | HC    | ✓ | Antagonism* | Not suitable for antagonism | x | FGF2 (or bFGF) is neuroprotective for healthy aging. It can improve motor function recovery, increase tyrosine hydroxylase positive neuron survival, and upregulate the levels of neurotransmitters in the brain of a rat model of Parkinson's disease.                                                                                                                                                                                                                       | PMID: 30274251                                       |
| FGFR1    | Yes | HC    | ✓ | Antagonism* | Not suitable for antagonism | x | Mice with an attenuation of FGFR1 signalling develop diabetes with age and exhibit a decreased number of beta-cells, and lower levels of FGFR1 in mice have also been related to craniofacial defects.                                                                                                                                                                                                                                                                        | PMID: 12514106,<br>PMID: 11130726                    |
| FGFR2    | Yes | HC    | ✓ | Antagonism* | Not suitable for antagonism | x | FGFR2 is important for cell division, cell maturation, formation of new blood vessels, wound healing, and bone growth and development                                                                                                                                                                                                                                                                                                                                         | -                                                    |
| FRK      | Yes | Novel | ✓ | Antagonism  | Not suitable for antagonism | x | FRK is involved in innate immune system during healthy aging.                                                                                                                                                                                                                                                                                                                                                                                                                 | Reactome                                             |
| HLTF     | No  | Novel | ✓ | Antagonism  | Not suitable for antagonism | x | Loss of HLTF function promotes intestinal carcinogenesis                                                                                                                                                                                                                                                                                                                                                                                                                      | PMID: 22452792                                       |
| ITK      | Yes | Novel | ✓ | Antagonism  | Not suitable for antagonism | x | ITK is important for adaptive immune system during healthy aging. btk29a ficP null mutation decreased lifespan in <i>Drosophila</i> . Btk29A is the sole Tec family member in <i>Drosophila</i> , including itk.                                                                                                                                                                                                                                                              | PMID: 23672610,<br>PMID: 16023106                    |
| KAT6A    | No  | Novel | ✓ | Antagonism  | Agonism                     | x | KAT6A belongs to histone acetyltransferase (HAT). Stability of HATs and histone deacetylases activities is necessary to maintain normal cellular functions or otherwise leads to aging. KAT6A was found to regulate Nrf2/ARE signaling pathway and inhibit ROS accumulation in bone marrow-derived mesenchymal stem cells from the old, thus promoting proliferation, colony formation, and osteogenic differentiation of OBMSCs. KAT6A could promote osteogenesis of OBMSCs. | PMID: 19818845,<br>PMID: 33541408,<br>PMID: 34808502 |
| KDR      | Yes | HC    | ✓ | Antagonism* | Not suitable for antagonism | x | KDR antagonists such as Ramucirumab, Cabozantinib approved for cancer treatment but our data showed KDR downregulation in cancers. KDR may be needed for normal angiogenesis, to ensure developing or healing tissues receive an adequate supply of nutrients.                                                                                                                                                                                                                | -                                                    |
| KIT      | Yes | HC    | ✓ | Antagonism* | Agonism                     | x | Adult myocardium relies on c-kit expression to regenerate after injury and to counteract aging effects on cardiac structure and function. Imatinib mesylate inhibiting PDGFRB, ABL1, KIT, BCR reduced lifespan in <i>C. elegans</i> .                                                                                                                                                                                                                                         | PMID: 31275242,<br>PMID: 32010883                    |
| KSR1     | No  | Novel | ✓ | Antagonism* | Agonism                     | x | KSP1 is positively regulate MAPK signaling in the context of constitutively active RAS. Genetic inhibition of Ras was found to extend lifespan. RasV12 failed to induce p53, p19ARF, p16INK4a, and p15INK4b expression in KSR1 <sup>-/-</sup> primary mouse embryo fibroblasts and increased proliferation instead of causing growth arrest. Reintroduction of wild-type KSR1 rescued RasV12-induced senescence.                                                              | PMID: 29596465,<br>PMID: 12874031,<br>PMID: 16507997 |
| MAPKAPK3 | No  | Novel | ✓ | Antagonism  | Agonism                     | x | JNK1/2/3 are the upstream of MK3. While the role of MAPKAPK3/MK3 in aging is unknown, overexpression of MAPK8/JNK in roundworms also increases lifespan.                                                                                                                                                                                                                                                                                                                      | -                                                    |
| MAPKAPK5 | Yes | Novel | ✓ | Antagonism  | Not suitable for antagonism | x | MAPKAPK5 is considered as tumor suppressor serine/threonine-protein kinase involved in mTORC1 signaling.                                                                                                                                                                                                                                                                                                                                                                      | -                                                    |
| MCM8     | No  | Novel | ✓ | Antagonism  | Not suitable for antagonism | x | MCM8 is involved in cell cycle checkpoint and DNA replication during healthy aging.                                                                                                                                                                                                                                                                                                                                                                                           | Reactome                                             |
| MDM2     | Yes | HC    | ✓ | Antagonism  | Not suitable for antagonism | x | MDM2 is a negative regulator of p53, a tumor-suppressor gene. Dominant-negative versions of <i>Drosophila melanogaster</i> p53 in adult neurons extends lifespan. Taken together, antagonizing MDM2 may result in increased p53 activities, which in turn contribute to accelerated aging. However, small-molecule MDM2 antagonists attenuate the senescence-associated secretory phenotype.                                                                                  | -                                                    |
| NCOA1    | No  | HC    | ✓ | Antagonism* | Agonism                     | x | Aging or ER antagonists were shown to downregulate NCOA1 in the hippocampus of female mice. 17β-estradiol treatment can upregulate NCOA1. Beta-Estradiol was shown to increase lifespan in <i>C. elegans</i> . Taken together, NCOA1 agonist may delay aging. NCOA1 is required for the anti-obesogenic effects of 17β-estradiol.                                                                                                                                             | PMID: 26287601,<br>PMID: 24134630                    |
| NCOA3    | No  | HC    | ✓ | Antagonism  | Agonism                     | x | NCOA3 overexpression is required in order to maintain the telomerase activity. NCOA3 is an inhibitor of senescence whose downregulation in aged individuals could be probably a tumor suppressor mechanism, preventing the clonal expansion of risky old cells from having damaged DNA.                                                                                                                                                                                       | PMID: 26469953                                       |
| NR3C1    | Yes | HC    | ✓ | Agonism     | Antagonism                  | x | Cyproterone acetate inhibiting AR, PGR & NR3C1 (approved for human use) extended lifespan in <i>C. elegans</i> .                                                                                                                                                                                                                                                                                                                                                              | PMID: 24134630                                       |
| PDGFRB   | Yes | HC    | ✓ | Antagonism  | Not suitable for antagonism | x | PDGFR-β signaling in the cardiomyocyte may regulate angiogenesis in the heart in response to load-induced stress through several different mechanisms. Imatinib mesylate inhibiting PDGFRB, ABL1, KIT, BCR reduced lifespan in <i>C. elegans</i> .                                                                                                                                                                                                                            | PMID: 20071776,<br>PMID: 3201088                     |
| PKM      | No  | HC    | ✓ | Antagonism  | Not suitable for antagonism | x | PKM is involved in innate immune system during healthy aging. In addition, loss of PKM2 impairs angiogenic sprouting and loss of endothelial PKM2 alters mitochondrial metabolism.                                                                                                                                                                                                                                                                                            | PMID: 30301887                                       |
| PLK1     | Yes | HC    | ✓ | Antagonism  | Not suitable for antagonism | x | PLK1 is involved in cell cycle regulation and DNA checkpoint during healthy aging; PLK1 promotes autophagy.                                                                                                                                                                                                                                                                                                                                                                   | PMID: 28102733,<br>PMID: 26597721                    |
| POLE     | Yes | Novel | ✓ | Antagonism  | Not suitable for antagonism | x | Tumor suppressor gene                                                                                                                                                                                                                                                                                                                                                                                                                                                         | -                                                    |
| PPP5C    | No  | Novel | ✓ | Antagonism  | Not suitable for antagonism | x | PPP5C is involved in DNA double-strand break repair during healthy aging.                                                                                                                                                                                                                                                                                                                                                                                                     | Reactome                                             |

|         |     |       |   |             |                                  |   |                                                                                                                                                                                                                                                                                                                                                                                                                                                                                                                                                                                                                          |                                                                                                     |
|---------|-----|-------|---|-------------|----------------------------------|---|--------------------------------------------------------------------------------------------------------------------------------------------------------------------------------------------------------------------------------------------------------------------------------------------------------------------------------------------------------------------------------------------------------------------------------------------------------------------------------------------------------------------------------------------------------------------------------------------------------------------------|-----------------------------------------------------------------------------------------------------|
| PTK2    | Yes | HC    | ✓ | Antagonism  | Not suitable for antagonism      | x | PTK2 is involved in innate immune system during healthy aging.                                                                                                                                                                                                                                                                                                                                                                                                                                                                                                                                                           | Reactome                                                                                            |
| RAC1    | No  | HC    | ✓ | Antagonism  | Not suitable for antagonism      | x | RAC1 is involved in adaptive immune system and innate immune system during healthy aging.                                                                                                                                                                                                                                                                                                                                                                                                                                                                                                                                | -                                                                                                   |
| RBCK1   | No  | Novel | ✓ | Antagonism  | Not suitable for antagonism      | x | RBCK1 depletion increases p53 protein levels and p53 target genes, and RBCK1 interacts with PTEN (tumor suppressor gene) and promotes PTEN degradation in K48-linked ubiquitination. Dominant-negative versions of Drosophila melanogaster p53 in adult neurons extends lifespan.                                                                                                                                                                                                                                                                                                                                        | PMID: 30874541, PMID: 35174471                                                                      |
| RHOA    | No  | HC    | ✓ | Antagonism  | Agonism                          | x | RHOA is involved in protecting against the progression of cardiac aging.                                                                                                                                                                                                                                                                                                                                                                                                                                                                                                                                                 | <a href="https://escholarship.org/uc/item/14g0843j">https://escholarship.org/uc/item/14g0843j</a>   |
| RHOH    | No  | Novel | ✓ | Antagonism  | Not suitable for antagonism      | x | Tumor suppressor gene                                                                                                                                                                                                                                                                                                                                                                                                                                                                                                                                                                                                    | -                                                                                                   |
| SMARCA4 | No  | HC    | ✓ | Antagonism  | Not suitable for antagonism      | x | Tumor suppressor gene                                                                                                                                                                                                                                                                                                                                                                                                                                                                                                                                                                                                    | -                                                                                                   |
| SMO     | Yes | Novel | ✓ | Antagonism  | Not suitable for antagonism      | x | SMO inhibition promotes aging. SMO has shown to be critical for the hedgehog signal transduction on the cell membrane. Hedgehog signaling is dysregulated in old hepatocytes, and this accelerates aging. Deleting SMO in young hepatocytes before partial hepatectomy prevented hedgehog pathway activation after partial hepatectomy and inhibited regeneration. In addition, hedgehog inhibition promoted telomere shortening and mitochondrial dysfunction in hepatocytes.                                                                                                                                           | PMID: 34984806                                                                                      |
| STK26   | No  | Novel | ✓ | Antagonism  | Not suitable for antagonism      | x | Depletion of STK24 (or MST4) in mice promoted gastric tumorigenesis.                                                                                                                                                                                                                                                                                                                                                                                                                                                                                                                                                     | PMID: 32271880                                                                                      |
| TAOK1   | No  | Novel | ✓ | Antagonism  | Not suitable for antagonism      | x | TAOK1 is involved for cell cycle checkpoints during healthy aging                                                                                                                                                                                                                                                                                                                                                                                                                                                                                                                                                        | Reactome                                                                                            |
| TLR4    | Yes | HC    | ✓ | Antagonism* | Conditional                      | x | TLR4 is an important Pattern Recognition Receptor (PRR), which activates both innate and adaptive immune cells. Its activation leads to inflammatory cytokine production which is responsible for activating the innate immune system. Additional cytokine production (agonist) may not necessary for the healthy but reduced production (antagonist) may alter immune response. The Toll-like receptor 4 (TLR4) signaling pathway is involved in many aspects of biological functions of AML cells, including the regulation of pro-inflammatory cytokine products, myeloid differentiation, and survival of AML cells. | PMID: 32508811, PMID: 30336978                                                                      |
| TNF     | Yes | HC    | ✓ | Antagonism  | Conditional (Antagonism for old) | x | TNF- $\alpha$ antagonism rescues the effect of ageing on stroke; TNF- $\alpha$ /IFN- $\gamma$ synergy amplifies senescence-associated inflammation. TNF-deficient mice develop normally but are more susceptible to some infectious agents.                                                                                                                                                                                                                                                                                                                                                                              | PMID: 34076259, PMID: 35645319                                                                      |
| TOP2A   | Yes | HC    | ✓ | Antagonism  | Not suitable for antagonism      | x | TOP2A is involved in cell cycle regulation during healthy aging. Topoisomerases regulate the topological states of DNA and important for neuron proliferation.                                                                                                                                                                                                                                                                                                                                                                                                                                                           | PMID: 7980433                                                                                       |
| TRAF7   | No  | Novel | ✓ | Antagonism  | Not suitable for antagonism      | x | Tumor suppressor gene                                                                                                                                                                                                                                                                                                                                                                                                                                                                                                                                                                                                    | -                                                                                                   |
| TRIM37  | No  | Novel | ✓ | Antagonism  | Not suitable for antagonism      | x | TRIM37 is involved in adaptive immune system during healthy aging.                                                                                                                                                                                                                                                                                                                                                                                                                                                                                                                                                       | Reactome                                                                                            |
| TTK     | No  | Novel | ✓ | Antagonism  | Agonism                          | x | Using bone-targeting recombinant adeno-associated virus 9 (rAAV9) to enhance Bmal1 or Ttk might have a therapeutic effect on senile osteoporosis and delays bone repair in aging mice.                                                                                                                                                                                                                                                                                                                                                                                                                                   | <a href="https://doi.org/10.1016/j.omtn.2023.02.014">https://doi.org/10.1016/j.omtn.2023.02.014</a> |
| UBE2C   | No  | HC    | ✓ | Antagonism  | Not suitable for antagonism      | x | UBE2C is involved in cell cycle checkpoints during healthy aging                                                                                                                                                                                                                                                                                                                                                                                                                                                                                                                                                         | Reactome                                                                                            |
| UBE2L6  | No  | Novel | ✓ | Antagonism  | Not suitable for antagonism      | x | UBE2L6 is involved in adaptive immune system during healthy aging.                                                                                                                                                                                                                                                                                                                                                                                                                                                                                                                                                       | Reactome                                                                                            |
| UBE2M   | No  | Novel | ✓ | Antagonism  | Not suitable for antagonism      | x | UBE2M is involved in adaptive immune system during healthy aging.                                                                                                                                                                                                                                                                                                                                                                                                                                                                                                                                                        | Reactome                                                                                            |
| VEGFA   | Yes | HC    | ✓ | Antagonism  | Not suitable for antagonism      | x | Counteracting age-related VEGF signaling insufficiency promotes healthy aging and extends lifespan.                                                                                                                                                                                                                                                                                                                                                                                                                                                                                                                      | PMID:34326210                                                                                       |
| ARL2    | No  | Novel | - | Antagonism  | -                                | - | -                                                                                                                                                                                                                                                                                                                                                                                                                                                                                                                                                                                                                        | -                                                                                                   |
| CTSB    | No  | HC    | - | Antagonism  | -                                | - | -                                                                                                                                                                                                                                                                                                                                                                                                                                                                                                                                                                                                                        | -                                                                                                   |
| CTSV    | No  | Novel | - | Antagonism  | -                                | - | -                                                                                                                                                                                                                                                                                                                                                                                                                                                                                                                                                                                                                        | -                                                                                                   |
| HDAC10  | Yes | Novel | - | Antagonism  | -                                | - | -                                                                                                                                                                                                                                                                                                                                                                                                                                                                                                                                                                                                                        | -                                                                                                   |
| HERC5   | No  | Novel | - | Antagonism* | -                                | - | -                                                                                                                                                                                                                                                                                                                                                                                                                                                                                                                                                                                                                        | -                                                                                                   |
| ITGA9   | No  | Novel | - | Agonism     | -                                | - | -                                                                                                                                                                                                                                                                                                                                                                                                                                                                                                                                                                                                                        | -                                                                                                   |
| PIP5K1A | No  | Novel | - | Antagonism  | -                                | - | -                                                                                                                                                                                                                                                                                                                                                                                                                                                                                                                                                                                                                        | -                                                                                                   |
| PIP5K1C | No  | Novel | - | Antagonism* | -                                | - | -                                                                                                                                                                                                                                                                                                                                                                                                                                                                                                                                                                                                                        | -                                                                                                   |
| PRIM1   | Yes | Novel | - | Antagonism  | -                                | - | -                                                                                                                                                                                                                                                                                                                                                                                                                                                                                                                                                                                                                        | -                                                                                                   |
| PSMA2   | Yes | Novel | - | Antagonism  | -                                | - | -                                                                                                                                                                                                                                                                                                                                                                                                                                                                                                                                                                                                                        | -                                                                                                   |
| PSMA3   | Yes | Novel | - | Antagonism  | -                                | - | -                                                                                                                                                                                                                                                                                                                                                                                                                                                                                                                                                                                                                        | -                                                                                                   |
| PSMA4   | Yes | Novel | - | Antagonism  | -                                | - | -                                                                                                                                                                                                                                                                                                                                                                                                                                                                                                                                                                                                                        | -                                                                                                   |
| PSMB1   | Yes | Novel | - | Antagonism  | -                                | - | -                                                                                                                                                                                                                                                                                                                                                                                                                                                                                                                                                                                                                        | -                                                                                                   |
| PSMB6   | Yes | Novel | - | Antagonism  | -                                | - | -                                                                                                                                                                                                                                                                                                                                                                                                                                                                                                                                                                                                                        | -                                                                                                   |
| PSMC1   | Yes | Novel | - | Antagonism  | -                                | - | -                                                                                                                                                                                                                                                                                                                                                                                                                                                                                                                                                                                                                        | -                                                                                                   |
| PSMC4   | Yes | Novel | - | Antagonism  | -                                | - | -                                                                                                                                                                                                                                                                                                                                                                                                                                                                                                                                                                                                                        | -                                                                                                   |
| PTPRF   | No  | Novel | - | Antagonism  | -                                | - | -                                                                                                                                                                                                                                                                                                                                                                                                                                                                                                                                                                                                                        | -                                                                                                   |
| RAB1B   | No  | Novel | - | Antagonism  | -                                | - | -                                                                                                                                                                                                                                                                                                                                                                                                                                                                                                                                                                                                                        | -                                                                                                   |
| TOP2B   | Yes | Novel | - | Antagonism* | -                                | - | -                                                                                                                                                                                                                                                                                                                                                                                                                                                                                                                                                                                                                        | -                                                                                                   |
| UBA2    | No  | Novel | - | Antagonism  | -                                | - | -                                                                                                                                                                                                                                                                                                                                                                                                                                                                                                                                                                                                                        | -                                                                                                   |
| UBE2T   | No  | Novel | - | Antagonism  | -                                | - | -                                                                                                                                                                                                                                                                                                                                                                                                                                                                                                                                                                                                                        | -                                                                                                   |
| USP11   | No  | Novel | - | Antagonism  | -                                | - | -                                                                                                                                                                                                                                                                                                                                                                                                                                                                                                                                                                                                                        | -                                                                                                   |

[1] Common cancer targets from group 4 (Figure 5; Table S6)

[2] Any occurrence in the 90 overlapped biological processes enriched with 51 targets (group 1 and group 2) contributed to lifespan extension

[3] Generally, upregulation in expression leads to proposed antagonist for cancer; downregulation in expression leads to proposed agonist for cancer. \* The therapeutic approach is proposed based on target's mechanism of action (see Table S6 for details)

Table S8. Gene Ontology terms commonly enriched by lifespan-extending (Group 1 and Group 2) and Group 4 targets

| ID         | Description                                                                 | GeneRatio | pvalue   | p.adjust | geneID                                                                                                 |
|------------|-----------------------------------------------------------------------------|-----------|----------|----------|--------------------------------------------------------------------------------------------------------|
| GO:0046777 | protein autophosphorylation                                                 | 19/101    | 5.32E-19 | 2.96E-16 | LYN/SRC/ABL1/PTK2/KDR/AURKA/KIT/PDGFRB/AURKB/FGFR1/FGR/FGFR2/HCK/MAPKAPK5/TAOK1/FES/MAPKAPK3/STK26/TTK |
| GO:0007169 | transmembrane receptor protein tyrosine kinase signaling pathway            | 15/101    | 1.52E-15 | 5.64E-13 | LYN/SRC/PTK2/KDR/BLK/KIT/PDGFRB/FGFR1/FGR/FGFR2/HCK/MET/MST1R/FRK/FES                                  |
| GO:0014068 | positive regulation of phosphatidylinositol 3-kinase signaling              | 10/101    | 3.51E-11 | 7.79E-09 | SRC/TNF/PTK2/KDR/VEGFA/FGF2/KIT/PDGFRB/FGFR1/FGR                                                       |
| GO:0043410 | positive regulation of MAPK cascade                                         | 12/101    | 2.95E-10 | 5.45E-08 | TNF/KDR/VEGFA/FGF2/HMGB1/KIT/PDGFRB/FGFR1/FGFR2/ADRA2C/TRAF7/KSR1                                      |
| GO:0030335 | positive regulation of cell migration                                       | 13/101    | 1.45E-09 | 1.61E-07 | LYN/PTK2/IL1B/KDR/VEGFA/ITGAV/KIT/MMP2/PDGFRB/CXCR4/FGR/SMO/RHOA                                       |
| GO:0016570 | histone modification                                                        | 9/101     | 2.55E-08 | 2.06E-06 | AURKA/KDM1A/AURKB/NCOA1/PKM/RPS6KA4/KAT6A/BAZ1B/NCOA3                                                  |
| GO:0043536 | positive regulation of blood vessel endothelial cell migration              | 6/101     | 5.85E-08 | 3.82E-06 | KDR/VEGFA/FGF2/HMGB1/FGFR1/AKT3                                                                        |
| GO:0018105 | peptidyl-serine phosphorylation                                             | 10/101    | 9.05E-08 | 5.02E-06 | SRC/AURKA/MAPKAPK5/PLK1/RPS6KA6/AKT3/RPS6KA2/RPS6KA4/MAPKAPK3/TTK                                      |
| GO:0043065 | positive regulation of apoptotic process                                    | 12/101    | 1.77E-07 | 8.55E-06 | SRC/TNF/ABL1/HMGB1/MMP2/PDGFRB/TOP2A/RPS6KA2/RAR/DNM2/NCOA1/RBCK1                                      |
| GO:0033674 | positive regulation of kinase activity                                      | 7/101     | 1.87E-07 | 8.63E-06 | KDR/KIT/PDGFRB/FGFR1/FGFR2/MET/MST1R                                                                   |
| GO:0035556 | intracellular signal transduction                                           | 14/101    | 2.23E-07 | 9.65E-06 | LYN/SRC/BLK/KIT/PDGFRB/MAPKAPK5/RPS6KA6/AKT3/RPS6KA2/ITK/RAC1/RPS6KA4/TAOK1/MAPKAPK3                   |
| GO:0051897 | positive regulation of protein kinase B signaling                           | 8/101     | 3.00E-07 | 1.23E-05 | SRC/TNF/PTK2/VEGFA/FGF2/FGFR1/MET/MST1R                                                                |
| GO:0043525 | positive regulation of neuron apoptotic process                             | 6/101     | 3.95E-07 | 1.56E-05 | TNF/ABL1/NR3C1/RHOA/CDC34/UBE2M                                                                        |
| GO:0048661 | positive regulation of smooth muscle cell proliferation                     | 6/101     | 7.95E-07 | 2.76E-05 | TNF/TLR4/FGF2/MMP2/PDGFRB/FGFR2                                                                        |
| GO:1904707 | positive regulation of vascular associated smooth muscle cell proliferation | 5/101     | 2.03E-06 | 6.45E-05 | SRC/TNF/FGF2/MMP2/DNMT1                                                                                |
| GO:0006954 | inflammatory response                                                       | 12/101    | 6.86E-06 | 1.76E-04 | LYN/TNF/IL1B/TLR4/HMGB1/KIT/CXCR4/HCK/FASN/RAC1/RPS6KA4/ADGRE5                                         |
| GO:0071222 | cellular response to lipopolysaccharide                                     | 8/101     | 6.98E-06 | 1.76E-04 | SRC/TNF/ABL1/IL1B/TLR4/HMGB1/RARA/RHOA                                                                 |
| GO:0042127 | regulation of cell population proliferation                                 | 8/101     | 1.51E-05 | 3.36E-04 | TNF/ABL1/PTK2/KIT/CDK6/DNMT1/FES/KSR1                                                                  |
| GO:0070372 | regulation of ERK1 and ERK2 cascade                                         | 4/101     | 1.75E-05 | 3.73E-04 | LYN/IL1B/FGFR2/TRAF7                                                                                   |
| GO:0010629 | negative regulation of gene expression                                      | 9/101     | 2.11E-05 | 4.34E-04 | TNF/KDR/VEGFA/FGF2/AURKA/RARA/SMO/DNMT1/ANAPC2                                                         |
| GO:0045785 | positive regulation of cell adhesion                                        | 5/101     | 3.09E-05 | 5.56E-04 | SRC/TNF/VEGFA/ITGAV/RHOA                                                                               |
| GO:1901224 | positive regulation of NK/NF-kappaB signaling                               | 5/101     | 4.19E-05 | 7.15E-04 | TNF/IL1B/TLR4/RHOA/RBCK1                                                                               |
| GO:0071300 | cellular response to retinoic acid                                          | 5/101     | 4.84E-05 | 8.14E-04 | LYN/TNF/HDAC2/RARA/FGFR2                                                                               |
| GO:0032496 | response to lipopolysaccharide                                              | 7/101     | 5.01E-05 | 8.22E-04 | TNF/IL1B/TLR4/HDAC2/FGFR2/CSF2RB/MAPKAPK3                                                              |
| GO:0043687 | post-translational protein modification                                     | 4/101     | 5.04E-05 | 8.22E-04 | AURKB/RPS6KA4/BAZ1B/UBE2M                                                                              |
| GO:0071560 | cellular response to transforming growth factor beta stimulus               | 5/101     | 5.19E-05 | 8.35E-04 | SRC/ABL1/HDAC2/FGFR2/NR3C1                                                                             |
| GO:0051091 | positive regulation of DNA-binding transcription factor activity            | 6/101     | 6.72E-05 | 1.07E-03 | TNF/IL1B/KDM1A/KIT/SMARCA4/TRIM37                                                                      |
| GO:0045429 | positive regulation of nitric oxide biosynthetic process                    | 4/101     | 9.48E-05 | 1.37E-03 | TNF/IL1B/TLR4/DNM2                                                                                     |
| GO:1901796 | regulation of signal transduction by p53 class mediator                     | 4/101     | 9.48E-05 | 1.37E-03 | AURKA/AURKB/MAPKAPK5/KAT6A                                                                             |
| GO:0050679 | positive regulation of epithelial cell proliferation                        | 5/101     | 9.94E-05 | 1.41E-03 | KDR/VEGFA/FGF2/FGFR2/SMO                                                                               |
| GO:0042542 | response to hydrogen peroxide                                               | 4/101     | 1.49E-04 | 1.82E-03 | SRC/MMP2/PDGFRB/STK26                                                                                  |
| GO:0009410 | response to xenobiotic stimulus                                             | 8/101     | 1.60E-04 | 1.93E-03 | LYN/SRC/TNF/ABL1/HDAC2/MMP2/DNMT3A/RHOA                                                                |
| GO:0001525 | angiogenesis                                                                | 8/101     | 1.82E-04 | 2.12E-03 | PTK2/KDR/VEGFA/FGF2/ITGAV/MMP2/PDGFRB/FGFR2                                                            |
| GO:0043491 | protein kinase B signaling                                                  | 4/101     | 2.24E-04 | 2.51E-03 | TNF/IL1B/KDR/FGF2                                                                                      |
| GO:1902895 | positive regulation of miRNA transcription                                  | 4/101     | 2.24E-04 | 2.51E-03 | TNF/FGF2/NR3C1/SMARCA4                                                                                 |
| GO:0051092 | positive regulation of NF-kappaB transcription factor activity              | 6/101     | 2.99E-04 | 3.10E-03 | TNF/IL1B/TLR4/TRIM37/RBCK1/RPS6KA4                                                                     |
| GO:0071230 | cellular response to amino acid stimulus                                    | 4/101     | 3.68E-04 | 3.65E-03 | TNF/MMP2/DNMT3A/DNMT1                                                                                  |
| GO:0009612 | response to mechanical stimulus                                             | 4/101     | 4.47E-04 | 4.33E-03 | SRC/TNF/MMP2/RHOA                                                                                      |
| GO:0045471 | response to ethanol                                                         | 5/101     | 4.49E-04 | 4.33E-03 | TNF/RARA/FGFR2/DNMT3A/RHOA                                                                             |
| GO:0001570 | vasculogenesis                                                              | 4/101     | 5.37E-04 | 5.01E-03 | KDR/VEGFA/ITGAV/SMO                                                                                    |
| GO:0042531 | positive regulation of tyrosine phosphorylation of STAT protein             | 4/101     | 5.37E-04 | 5.01E-03 | LYN/TNF/HDAC2/KIT                                                                                      |
| GO:0030155 | regulation of cell adhesion                                                 | 4/101     | 5.69E-04 | 5.22E-03 | ABL1/PTK2/CXCR4/FES                                                                                    |
| GO:0008283 | cell population proliferation                                               | 7/101     | 6.98E-04 | 6.16E-03 | SRC/FGF2/KIT/AURKB/KRAS/SMO/RAR                                                                        |
| GO:0007094 | mitotic spindle assembly checkpoint signaling                               | 3/101     | 7.04E-04 | 6.16E-03 | AURKB/PLK1/TTK                                                                                         |
| GO:0050673 | epithelial cell proliferation                                               | 4/101     | 7.14E-04 | 6.19E-03 | KDR/FGF2/KIT/SMO                                                                                       |
| GO:0051301 | cell division                                                               | 9/101     | 7.20E-04 | 6.19E-03 | AURKA/AURKB/CDK6/NR3C1/PLK1/RHOA/CDC34/ANAPC2/UBE2C                                                    |
| GO:0048565 | digestive tract development                                                 | 3/101     | 8.53E-04 | 7.12E-03 | KIT/FGFR2/SMO                                                                                          |
| GO:0042327 | positive regulation of phosphorylation                                      | 3/101     | 1.11E-03 | 8.57E-03 | LYN/KDR/VEGFA                                                                                          |
| GO:0009314 | response to radiation                                                       | 3/101     | 1.31E-03 | 9.95E-03 | TNF/KIT/MMP2                                                                                           |
| GO:0014070 | response to organic cyclic compound                                         | 5/101     | 1.35E-03 | 1.02E-02 | LYN/TNF/KDM1A/PDGFRB/CXCR4                                                                             |
| GO:0007568 | aging                                                                       | 5/101     | 2.05E-03 | 1.36E-02 | FGF2/MMP2/PDGFRB/AURKB/DNMT3A                                                                          |
| GO:0014823 | response to activity                                                        | 3/101     | 2.46E-03 | 1.51E-02 | TNF/MMP2/CXCR4                                                                                         |
| GO:0033628 | regulation of cell adhesion mediated by integrin                            | 2/101     | 2.54E-03 | 1.51E-02 | LYN/PTK2                                                                                               |
| GO:0051239 | regulation of multicellular organismal process                              | 2/101     | 2.54E-03 | 1.51E-02 | TNF/PTK2                                                                                               |
| GO:0001666 | response to hypoxia                                                         | 5/101     | 2.63E-03 | 1.54E-02 | TNF/VEGFA/MMP2/CXCR4/RHOA                                                                              |
| GO:0007173 | epidermal growth factor receptor signaling pathway                          | 3/101     | 2.78E-03 | 1.60E-02 | SRC/ABL1/PTK2                                                                                          |
| GO:0042789 | mRNA transcription by RNA polymerase II                                     | 3/101     | 2.78E-03 | 1.60E-02 | RARA/NCOA1/HLTF                                                                                        |
| GO:0043124 | negative regulation of I-kappaB kinase/NF-kappaB signaling                  | 3/101     | 2.78E-03 | 1.60E-02 | ABL1/RHOA/RHOH                                                                                         |

|            |                                                                                   |       |          |          |                                           |
|------------|-----------------------------------------------------------------------------------|-------|----------|----------|-------------------------------------------|
| GO:0030324 | lung development                                                                  | 4/101 | 2.82E-03 | 1.61E-02 | KDR/VEGFA/FGF2/FGFR2                      |
| GO:0060644 | mammary gland epithelial cell differentiation                                     | 2/101 | 2.95E-03 | 1.64E-02 | FGF2/SMO                                  |
| GO:0010718 | positive regulation of epithelial to mesenchymal transition                       | 3/101 | 2.95E-03 | 1.64E-02 | PTK2/IL1B/HDAC2                           |
| GO:0031648 | protein destabilization                                                           | 3/101 | 3.12E-03 | 1.71E-02 | SRC/PLK1/MDM2                             |
| GO:0006351 | DNA-templated transcription                                                       | 7/101 | 3.15E-03 | 1.71E-02 | RARA/NR3C1/DNMT1/RARB/PPP5C/KAT6A/KDM2A   |
| GO:0071168 | protein localization to chromatin                                                 | 2/101 | 3.39E-03 | 1.77E-02 | PLK1/MCM8                                 |
| GO:0048146 | positive regulation of fibroblast proliferation                                   | 3/101 | 3.49E-03 | 1.81E-02 | ABL1/PDGFRB/CDK6                          |
| GO:0050727 | regulation of inflammatory response                                               | 4/101 | 3.60E-03 | 1.86E-02 | LYN/TNF/TLR4/HCK                          |
| GO:0090398 | cellular senescence                                                               | 3/101 | 3.89E-03 | 1.94E-02 | ABL1/MAPKAPK5/KAT6A                       |
| GO:0000086 | G2/M transition of mitotic cell cycle                                             | 3/101 | 4.10E-03 | 2.02E-02 | AURKA/PLK1/DNM2                           |
| GO:0034097 | response to cytokine                                                              | 3/101 | 4.31E-03 | 2.08E-02 | MMP2/RARA/MAPKAPK3                        |
| GO:0071456 | cellular response to hypoxia                                                      | 4/101 | 4.80E-03 | 2.21E-02 | SRC/VEGFA/DNMT3A/MDM2                     |
| GO:0030889 | negative regulation of B cell proliferation                                       | 2/101 | 4.88E-03 | 2.21E-02 | LYN/BLK                                   |
| GO:0036211 | protein modification process                                                      | 4/101 | 5.10E-03 | 2.30E-02 | ABL1/CDC34/UBE2M/UBE2L6                   |
| GO:0033189 | response to vitamin A                                                             | 2/101 | 5.44E-03 | 2.38E-02 | RARA/DNMT3A                               |
| GO:2000811 | negative regulation of anoikis                                                    | 2/101 | 5.44E-03 | 2.38E-02 | SRC/PTK2                                  |
| GO:0010468 | regulation of gene expression                                                     | 7/101 | 5.54E-03 | 2.39E-02 | CDK6/DNMT3A/MDM2/SMO/DNMT1/SMARCA4/DNMT3B |
| GO:0070301 | cellular response to hydrogen peroxide                                            | 3/101 | 5.99E-03 | 2.53E-02 | SRC/ABL1/HDAC2                            |
| GO:0043154 | negative regulation of cysteine-type endopeptidase activity involved in apoptosis | 3/101 | 6.54E-03 | 2.73E-02 | SRC/TNF/VEGFA                             |
| GO:0002223 | stimulatory C-type lectin receptor signaling pathway                              | 2/101 | 6.63E-03 | 2.74E-02 | LYN/SRC                                   |
| GO:0000082 | G1/S transition of mitotic cell cycle                                             | 3/101 | 6.82E-03 | 2.81E-02 | CDK6/POLE/CDC34                           |
| GO:0001932 | regulation of protein phosphorylation                                             | 3/101 | 7.71E-03 | 3.16E-02 | LYN/TNF/PTK2                              |
| GO:0060045 | positive regulation of cardiac muscle cell proliferation                          | 2/101 | 7.92E-03 | 3.21E-02 | FGF2/FGFR2                                |
| GO:0032091 | negative regulation of protein binding                                            | 3/101 | 1.00E-02 | 3.85E-02 | AURKA/KDM1A/AURKB                         |
| GO:0048714 | positive regulation of oligodendrocyte differentiation                            | 2/101 | 1.01E-02 | 3.85E-02 | HDAC2/CXCR4                               |
| GO:0008285 | negative regulation of cell population proliferation                              | 7/101 | 1.09E-02 | 4.11E-02 | LYN/TNF/IL1B/FGF2/RARA/CDK6/RPS6KA2       |
| GO:0032148 | activation of protein kinase B activity                                           | 2/101 | 1.24E-02 | 4.43E-02 | SRC/ADRA2C                                |
| GO:0035924 | cellular response to vascular endothelial growth factor stimulus                  | 2/101 | 1.24E-02 | 4.43E-02 | KDR/VEGFA                                 |
| GO:0043200 | response to amino acid                                                            | 2/101 | 1.24E-02 | 4.43E-02 | LYN/RHOA                                  |
| GO:0071480 | cellular response to gamma radiation                                              | 2/101 | 1.24E-02 | 4.43E-02 | KDM1A/MDM2                                |
| GO:0010592 | positive regulation of lamellipodium assembly                                     | 2/101 | 1.33E-02 | 4.70E-02 | RAC1/DNM2                                 |
| GO:0097421 | liver regeneration                                                                | 2/101 | 1.41E-02 | 4.88E-02 | TNF/AURKA                                 |



**Table S9. Description for scores and filters on PandaOmics.**

| <b>Category</b> | <b>Score/ Filter</b>  | <b>Description</b>                                                                                                                                                                                                                                                                                                                                                                                                                                                                                                                                                                                                                         |
|-----------------|-----------------------|--------------------------------------------------------------------------------------------------------------------------------------------------------------------------------------------------------------------------------------------------------------------------------------------------------------------------------------------------------------------------------------------------------------------------------------------------------------------------------------------------------------------------------------------------------------------------------------------------------------------------------------------|
| Omics AI scores | Network Neighbors     | This score utilizes several graph-based methods applied to the protein-protein interaction network enriched with differentially expressed/methylated genes. The score explores direct network neighbors interacting with a given gene. A target will be scored higher if there are more network neighbors with significant differences in expression or methylation levels.                                                                                                                                                                                                                                                                |
|                 | Casual Inference      | This score is based on the causal inference of transcription factors. It estimates the number of genes associated with the disease progression/treatment, controlled by a similar set of transcription factors to a given gene. It uses a manually curated regulatory network and known drug targets to predict potential disease-modifying transcription factors.                                                                                                                                                                                                                                                                         |
|                 | Pathways              | The score combines several approaches to pathway analysis. First, iPANDA algorithm is used to examine the involvement of a given gene in pathway activation patterns based on a collection of gene expression datasets of interest (activation/inhibition of each pathway is examined separately). Next, all the pathways from the library are merged into a single network, which is examined from the perspective of signal propagation by a number of methods. The final score indicates how a given gene affects individual pathways' activation/inhibition, and whether it possesses the ability to affect multiple pathways at once. |
|                 | Interactome Community | This score utilizes several graph-based methods applied to the protein-protein interaction network enriched with active drug targets, GWAS hits and differentially expressed/methylated genes.                                                                                                                                                                                                                                                                                                                                                                                                                                             |
|                 | Relevance             | This score is based on open data from the OpenTargets resource, in particular, Drugs score. Drugs score aggregates general information about all drugs and their stages of clinical trials that are associated with a specific gene (protein, molecular target) for a disease of interest. The more drugs that have a specific gene as a molecular target, especially in the late phases of clinical trials, the higher the Drugs score for that gene.                                                                                                                                                                                     |
|                 | Expression            | This score takes into account differential gene expression, protein abundance or methylation level defined by a collection of datasets of interest. Machine learning-based models are used to normalize available omics data across multiple samples from various datasets.                                                                                                                                                                                                                                                                                                                                                                |

|                      |                          |                                                                                                                                                                                                                                                                                                                                                                                                                                                                                                                                                                                                                                                                                                                                                                                                |
|----------------------|--------------------------|------------------------------------------------------------------------------------------------------------------------------------------------------------------------------------------------------------------------------------------------------------------------------------------------------------------------------------------------------------------------------------------------------------------------------------------------------------------------------------------------------------------------------------------------------------------------------------------------------------------------------------------------------------------------------------------------------------------------------------------------------------------------------------------------|
|                      | Heterogeneous Graph Walk | This score is a guided random walk-based approach that is applied to a heterogeneous graph (i.e., a graph containing different types of nodes). The model learns node representations and then finds the gene nodes similar to the reference disease node. First, the "walks" are sampled with a predefined meta-path, i.e., the fixed sequence of node types in a walk, e.g. 'gene'-'disease'-'gene.' The node degree controls the probability of transition between the nodes while sampling. Following that, the AI model learns the representation of each node based on the resulting corpus of walks. The similarity between the specific disease and all available genes produces a ranked list of genes. The top genes from this list are predicted to be promising target hypotheses. |
|                      | Matrix Factorization     | This score is based on a collaborative filtering algorithm, which is widely used in recommender systems. First, well-known gene-disease associations from the PandaOmics database are converted to a sparse binary matrix. This matrix is then decomposed into two low-rank matrices that consist of latent factors for genes and diseases. The algorithm uses graph regularization based on a fast kNN search to account for the intraclass similarity between the nodes of a similar type. Recomputing the original interaction matrix from latent factors provides the scores for unobserved interactions; thus, gene ranking is obtained.                                                                                                                                                  |
| Text-based AI scores | Evidence                 | This score is calculated as the weighted average of Trend and Attention score. Higher values indicate both attention growth and a high volume of research.                                                                                                                                                                                                                                                                                                                                                                                                                                                                                                                                                                                                                                     |
|                      | Attention Score          | This score measures the overall attention to the target at all times. PandaOmics calculates the total number of mentions of a gene in various texts across all time periods. Both disease-agnostic and disease-specific mentions are counted. Text corpus used for analysis includes scientific publications, grants, patents and clinical trials.                                                                                                                                                                                                                                                                                                                                                                                                                                             |
| Financial Scores     | Grant Funding            | Total grant funding to investigate the given gene at all times. Please note, that the distribution of total funding is skewed with mean value approx. \$8.9 million, but the median value is only \$1.7 million. Also 5% of entries have funding above \$30 million.                                                                                                                                                                                                                                                                                                                                                                                                                                                                                                                           |
| KOL Scores           | Credible Attention Index | This score represents the total number of publications devoted to the target gene in journals with an impact factor more than 10. This corresponds to the top 3% of all scientific journals.                                                                                                                                                                                                                                                                                                                                                                                                                                                                                                                                                                                                   |
|                      | Impact factor            | This score measures the average impact factor of the journals where particular gene-disease association is published. The Impact Factor of each journal is weighted to the number of publications mentioning gene-disease association published in this journal.                                                                                                                                                                                                                                                                                                                                                                                                                                                                                                                               |

|                     |                 |                                                                                                                                                                                                                                                                                                                                                                                                   |
|---------------------|-----------------|---------------------------------------------------------------------------------------------------------------------------------------------------------------------------------------------------------------------------------------------------------------------------------------------------------------------------------------------------------------------------------------------------|
| Druggability Filter | Small Molecules | Indicates accessibility of a protein by small molecules<br><br>Red - A protein does not belong to a druggable class and does not have small molecules associated<br>Yellow - A protein belongs to a druggable class and does not have small molecules associated<br>Green - A protein is associated with small molecules according to public sources and the PandaOmics manually curated database |
|                     | Antibodies      | Indicates the ability to use antibodies to hit the target<br><br>Red - It is not membrane secreted protein (Protein atlas database)<br>Yellow - A membrane secreted protein (Protein atlas database)<br>Green - A membrane secreted protein (Protein atlas database) with associated antibodies in TCRD database                                                                                  |
|                     | Safety          | Potential safety of a target and potential adverse effect<br><br>Red - A protein is an essential gene and did not pass any clinical trials (Clinical trials and TTD)<br>Yellow - Default status<br>Green - A protein is a conditional essential gene or is not essential and has clinical trials going on or passed (Clinical trials and TTD)                                                     |
|                     | Novelty         | Indicates the overall scientific community interest to the target, based on the volume of related publications proposed by the proprietary AI engine<br><br>Red - More than 168 publications on pharmacognitive<br>Yellow - Between 50 and 168 publications on pharmacognitive<br>Green - Less than 49 publications on pharmacognitive                                                            |
|                     | Target Families | <p>Enzyme Druggable</p> <p>Epigenetic enzyme Druggable</p> <p>Epigenetic nonenzyme Not druggable</p> <p>Generic protein Not druggable</p> <p>Ion channel Druggable</p> <p>Kinase Druggable</p> <p>Nuclear receptor Druggable</p> <p>Receptor Druggable</p> <p>Secretory protein Druggable</p>                                                                                                     |

|                           |               |
|---------------------------|---------------|
| Transcription coregulator | Not druggable |
| Transcription factor      | Not druggable |
| Transporter               | Druggable     |

---
