# Supplementary material for: A comprehensive AI‐driven analysis of large‐scale omic datasets reveals novel dual‐purpose targets for the treatment of cancer and aging
Source: PubMed Central journal article supplement (PMC10726874; doi:10.1111/acel.14017), 2023-10-27

Downregulated age-associated TSGs

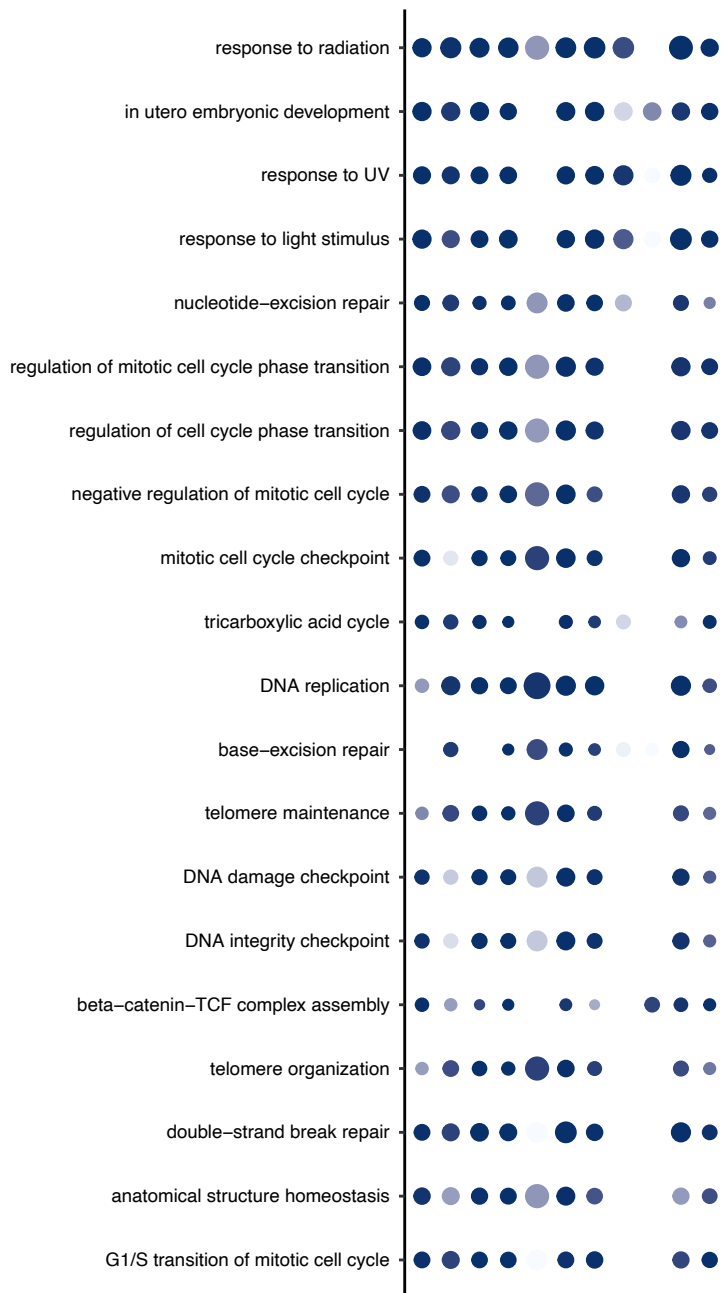

Upregulated age-associated TSGs

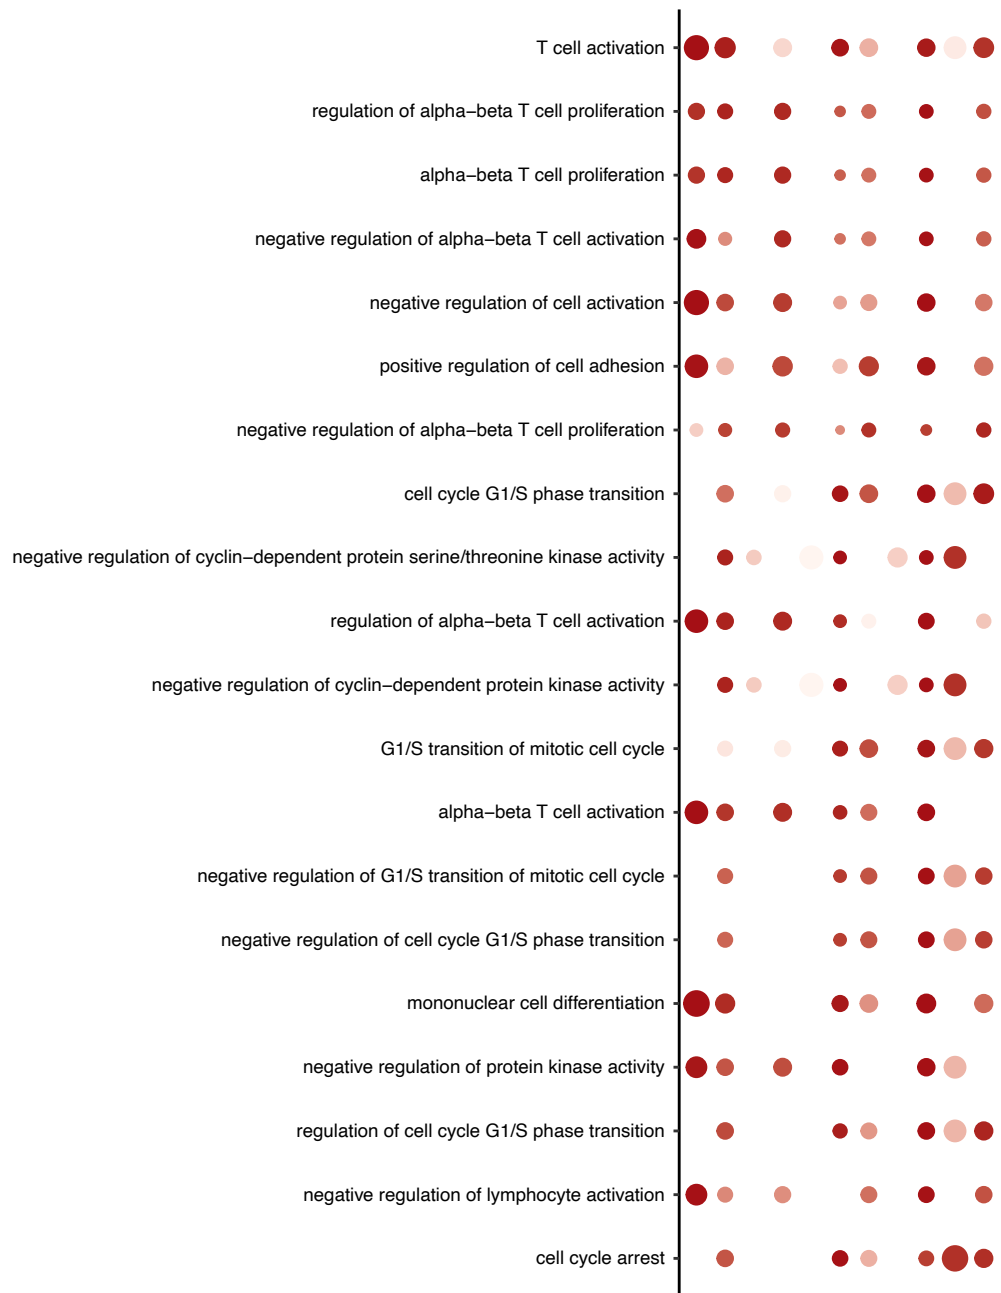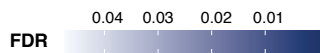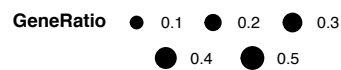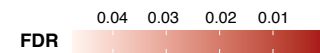

Supplement: ACEL-22-e14017-s005.pdf [file ACEL-22-e14017-s005.pdf]
