# Supplementary material for: A comprehensive AI‐driven analysis of large‐scale omic datasets reveals novel dual‐purpose targets for the treatment of cancer and aging
Source: PubMed Central journal article supplement (PMC10726874; doi:10.1111/acel.14017), 2023-10-27
Supplement: ACEL-22-e14017-s006.pdf [file ACEL-22-e14017-s006.pdf]

Expression

Artery tibial

$R = -0.405$   
 $p = 1.74e-27$

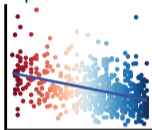

Esophag.  
gastroesophag. junct.

$R = -0.244$   
 $p = 1.86e-06$

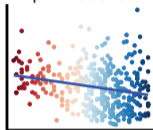

Esophagus  
mucosa

$R = -0.297$   
 $p = 8.92e-13$

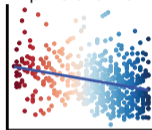

Minor  
salivary gland

$R = -0.456$   
 $p = 1.26e-09$

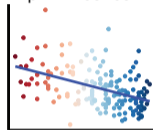

Muscle skeletal

$R = -0.284$   
 $p = 2.15e-16$

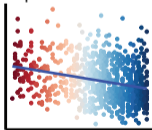

Testis

$R = -0.241$   
 $p = 3.63e-06$

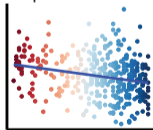

Thyroid

$R = -0.257$   
 $p = 2.71e-11$

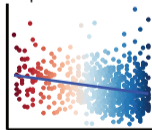

Vagina

$R = -0.329$   
 $p = 2.88e-05$

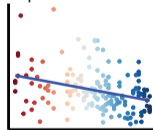

Age

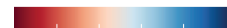

20 30 40 50 60 70
